# Supplementary material for: Electrophilic N-trifluoromethylthiophthalimide as a fluorinated reagent in the synthesis of acyl fluorides
Source: Royal Society of Chemistry journal article supplement (doi:10.1039/d1qo01633d), 2021-11-25

## Supporting Information

# Electrophilic *N*-Trifluoromethylthiophthalimide as a Fluorinated Reagent in the Synthesis of Acyl Fluorides

Chen Zhu<sup>†</sup>, Serik Zhumagazy<sup>†</sup>, Huifeng Yue\*, and Magnus Rueping\*

KAUST Catalysis Center (KCC), King Abdullah University of Science and Technology (KAUST)

<sup>†</sup>These authors contributed equally to this work.

- 1. General Information**
- 2. General Procedure for the Deoxygenative Fluorination of Carboxylic Acids**
- 3. Spectroscopic Data of the Products**
- 4. Gram-Scale Reaction and Synthetic Application**
- 5. References**
- 6. Copies of NMR Spectra**

## 1. General Information

Unless otherwise noted, all commercially available compounds were used as provided without further purification. Solvents for chromatography were HPLC grade. Anhydrous and degassed CH<sub>3</sub>CN used in reactions was purchased from Sigma-Aldrich in Sure/Seal™ bottle. Analytical thin-layer chromatography (TLC) was performed on Merck silica gel aluminium plates with F-254 indicator, visualized by irradiation with UV light. Column chromatography was performed on silica gel (particle size 0.043–0.063 mm) by using Interchim PuriFlash® 430 automatic purification system. <sup>1</sup>H-NMR and <sup>13</sup>C-NMR were recorded on Bruker DRX-500 and AMX-400 instruments in CDCl<sub>3</sub> and are reported relative to the solvent residual peaks. Data are reported in the following order: chemical shift (δ) in ppm; multiplicities are indicated s (singlet), bs (broad singlet), d (doublet), t (triplet), m (multiplet); coupling constants (*J*) are in Hertz (Hz). Mass spectra (EI-MS, 70 eV) were conducted on a Agilent 7890 gas chromatograph equipped with 5975C EI-MSD Triple-Axis Detector using DB5MS and HP5MS columns. HRMS analysis was performed using a Thermo LTQ Velos Orbitrap mass spectrometer (Thermo Scientific, Pittsburgh, PA, USA) equipped with an ESI source.

## 2. General Procedure for the Deoxygenative Fluorination of Carboxylic

### Acids

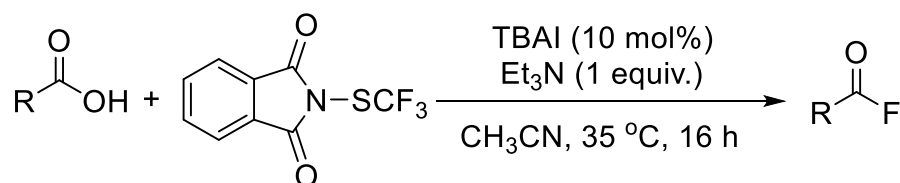

A dry 10 mL vial equipped with a stirring bar was charged with *N*-trifluoromethylthiophthalimide (0.2 mmol, 1 equiv.), carboxylic acid (0.4 mmol, 2 equiv.), TBAI (7.4 mg, 0.02 mmol, 10 mol%) in glovebox. Anhydrous and degassed CH<sub>3</sub>CN (2.0 mL) and Et<sub>3</sub>N (28 μL, 1 equiv.) was added via syringe. The reaction mixture was stirred at 35 °C for 16 h. After the reaction is completed, the mixture was concentrated under vacuum and the product was purified by flash column chromatography on silica gel using hexane/EtOAc as eluent.

### 3. Spectroscopic Data of the Products

#### 4-(*tert*-butyl)benzoyl fluoride (3a)

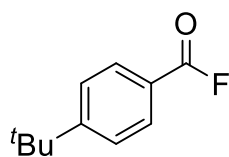

Yield: 89% (32.0 mg);  $^1\text{H}$  NMR (400 MHz,  $\text{CDCl}_3$ )  $\delta$  8.00 (d,  $J = 8.4$  Hz, 2H), 7.56 (d,  $J = 8.1$  Hz, 2H), 1.38 (s, 9H).  $^{13}\text{C}$  NMR (101 MHz,  $\text{CDCl}_3$ )  $\delta$  159.5, 157.5 (d,  $J = 342.9$  Hz), 131.4 (d,  $J = 4.0$  Hz), 126.1, 122.0 (d,  $J = 60.9$  Hz), 35.4, 31.0.  $^{19}\text{F}$  NMR (377 MHz,  $\text{CDCl}_3$ )  $\delta$  17.66. Data in accordance with the literature.<sup>1</sup>

#### 3-methylbenzoyl fluoride (3b)

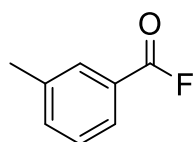

Yield: 83% (22.9 mg);  $^1\text{H}$  NMR (400 MHz,  $\text{CDCl}_3$ )  $\delta$  7.87 (d,  $J = 7.5$  Hz, 2H), 7.53 (d,  $J = 7.7$  Hz, 1H), 7.43 (t,  $J = 7.6$  Hz, 1H), 2.46 (s, 3H).  $^{13}\text{C}$  NMR (101 MHz,  $\text{CDCl}_3$ )  $\delta$  157.6 (d,  $J = 344.4$  Hz), 139.1, 136.1, 131.9, 128.9, 128.6, 124.9 (d,  $J = 60.1$  Hz), 21.2.  $^{19}\text{F}$  NMR (377 MHz,  $\text{CDCl}_3$ )  $\delta$  18.25. Data in accordance with the literature.<sup>1</sup>

#### 3-methoxybenzoyl fluoride (3c)

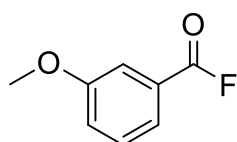

Yield: 97% (29.9 mg);  $^1\text{H}$  NMR (500 MHz,  $\text{CDCl}_3$ )  $\delta$  7.67 (d,  $J = 7.6$  Hz, 1H), 7.55 (s, 1H), 7.45 (t,  $J = 8.0$  Hz, 1H), 7.26 (dd,  $J = 8.3, 2.6$  Hz, 1H), 3.89 (s, 3H).  $^{13}\text{C}$  NMR (126 MHz,  $\text{CDCl}_3$ )  $\delta$  159.9, 157.3 (d,  $J = 344.6$  Hz), 130.1, 126.1 (d,  $J = 60.9$  Hz), 123.9 (d,  $J = 3.4$  Hz), 122.0, 115.5 (d,  $J = 4.3$  Hz), 55.6.  $^{19}\text{F}$  NMR (471 MHz,  $\text{CDCl}_3$ )  $\delta$  18.60. Data in accordance with the literature.<sup>2</sup>

#### 4-(methylthio)benzoyl fluoride (3d)

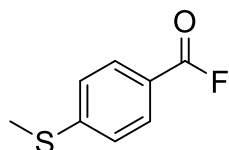

Yield: 91% (30.9 mg);  $^1\text{H}$  NMR (500 MHz,  $\text{CDCl}_3$ )  $\delta$  7.94 (d,  $J = 8.5$  Hz, 2H), 7.33 (d,  $J = 8.3$  Hz, 2H), 2.56 (s, 3H).  $^{13}\text{C}$  NMR (126 MHz,  $\text{CDCl}_3$ )  $\delta$  157.3 (d,  $J = 341.3$  Hz), 149.4, 131.6 (d,  $J = 3.8$  Hz), 125.1,

120.5 (d,  $J = 61.8$  Hz), 14.6.  $^{19}\text{F}$  NMR (471 MHz,  $\text{CDCl}_3$ )  $\delta$  16.63. Data in accordance with the literature.<sup>2</sup>

#### 4-phenoxybenzoyl fluoride (3e)

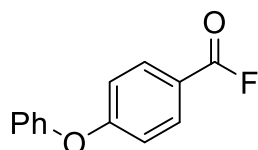

Yield: 92% (39.7 mg);  $^1\text{H}$  NMR (500 MHz,  $\text{CDCl}_3$ )  $\delta$  8.02 (d,  $J = 8.8$  Hz, 2H), 7.46 (t,  $J = 8.0$  Hz, 2H), 7.28 (t,  $J = 7.4$  Hz, 1H), 7.12 (d,  $J = 7.7$  Hz, 2H), 7.05 (d,  $J = 8.7$  Hz, 2H).  $^{13}\text{C}$  NMR (126 MHz,  $\text{CDCl}_3$ )  $\delta$  164.1, 157.0 (d,  $J = 340.9$  Hz), 154.7, 133.8 (d,  $J = 4.0$  Hz), 130.3, 125.3, 120.6, 118.5 (d,  $J = 62.0$  Hz), 117.4.  $^{19}\text{F}$  NMR (377 MHz,  $\text{CDCl}_3$ )  $\delta$  16.79. Data in accordance with the literature.<sup>3</sup>

#### 4-chlorobenzoyl fluoride (3f)

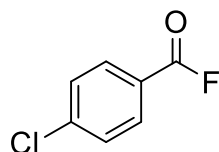

Yield: 44% (14.0 mg);  $^1\text{H}$  NMR (500 MHz,  $\text{CDCl}_3$ )  $\delta$  8.01 (d,  $J = 8.6$  Hz, 2H), 7.54 (d,  $J = 8.6$  Hz, 2H).  $^{13}\text{C}$  NMR (126 MHz,  $\text{CDCl}_3$ )  $\delta$  156.6 (d,  $J = 343.4$  Hz), 142.2, 132.7 (d,  $J = 3.8$  Hz), 129.6, 123.4 (d,  $J = 62.5$  Hz).  $^{19}\text{F}$  NMR (471 MHz,  $\text{CDCl}_3$ )  $\delta$  18.43. Data in accordance with the literature.<sup>4</sup>

#### 4-bromobenzoyl fluoride (3g)

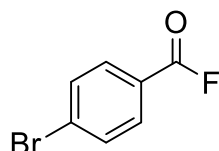

Yield: 62% (25.3 mg);  $^1\text{H}$  NMR (500 MHz,  $\text{CDCl}_3$ )  $\delta$  7.93 (d,  $J = 8.5$  Hz, 2H), 7.71 (d,  $J = 8.6$  Hz, 2H).  $^{13}\text{C}$  NMR (126 MHz,  $\text{CDCl}_3$ )  $\delta$  156.8 (d,  $J = 343.7$  Hz), 132.7 (d,  $J = 3.8$  Hz), 132.6, 131.0, 123.8 (d,  $J = 62.5$  Hz).  $^{19}\text{F}$  NMR (471 MHz,  $\text{CDCl}_3$ )  $\delta$  18.43. Data in accordance with the literature.<sup>1</sup>

#### 4-iodobenzoyl fluoride (3h)

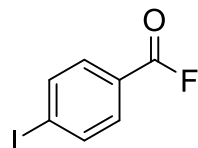

Yield: 50% (25.1 mg);  $^1\text{H}$  NMR (500 MHz,  $\text{CDCl}_3$ )  $\delta$  7.93 (d,  $J = 7.7$  Hz, 8H), 7.76 (d,  $J = 8.5$  Hz, 7H), 7.28 (s, 1H).  $^{13}\text{C}$  NMR (126 MHz,  $\text{CDCl}_3$ )  $\delta$  157.1 (d,  $J = 343.9$  Hz), 138.6, 132.5 (d,  $J = 3.8$  Hz), 124.4 (d,  $J = 62.2$  Hz), 104.0.  $^{19}\text{F}$  NMR (471 MHz,  $\text{CDCl}_3$ )  $\delta$  18.28. Data in accordance with the literature.<sup>5</sup>

### **Tert-butyl (4-(fluorocarbonyl)phenyl)carbamate (3i)**

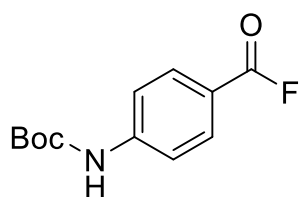

Yield: 99% (47.2 mg);  $^1\text{H NMR}$  (400 MHz,  $\text{CDCl}_3$ )  $\delta$  7.98 (d,  $J = 8.7$  Hz, 2H), 7.54 (d,  $J = 8.5$  Hz, 2H), 1.54 (s, 9H).  $^{13}\text{C NMR}$  (101 MHz,  $\text{CDCl}_3$ )  $\delta$  157.2 (d,  $J = 340.6$  Hz), 152.0, 145.1, 133.0 (d,  $J = 4.0$  Hz), 118.4 (d,  $J = 61.8$  Hz), 117.7, 81.8, 28.2.  $^{19}\text{F NMR}$  (377 MHz,  $\text{CDCl}_3$ )  $\delta$  16.21. HRMS (FDMS) for  $\text{C}_{12}\text{H}_{14}\text{FNO}_3$ : calculated for  $[\text{M}]^+$  239.0952, found 239.0995.

### **[1,1'-biphenyl]-4-carbonyl fluoride (3j)**

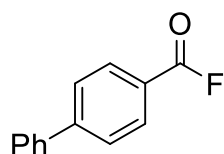

Yield: 52% (20.8 mg);  $^1\text{H NMR}$  (500 MHz,  $\text{CDCl}_3$ )  $\delta$  8.14 (d,  $J = 8.3$  Hz, 2H), 7.77 (d,  $J = 7.9$  Hz, 2H), 7.66 (d,  $J = 7.2$  Hz, 2H), 7.52 (t,  $J = 7.4$  Hz, 2H), 7.47 (t,  $J = 7.3$  Hz, 1H).  $^{13}\text{C NMR}$  (126 MHz,  $\text{CDCl}_3$ )  $\delta$  157.4 (d,  $J = 343.2$  Hz), 148.1, 139.3, 132.0 (d,  $J = 3.9$  Hz), 129.1, 128.8, 127.7, 127.4, 123.5 (d,  $J = 61.2$  Hz).  $^{19}\text{F NMR}$  (471 MHz,  $\text{CDCl}_3$ )  $\delta$  18.14. Data in accordance with the literature.<sup>1</sup>

### **[1,1'-biphenyl]-2-carbonyl fluoride (3k)**

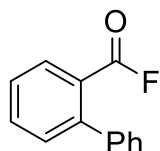

Yield: 91% (36.4 mg);  $^1\text{H NMR}$  (500 MHz,  $\text{CDCl}_3$ )  $\delta$  8.07 (d,  $J = 7.9$  Hz, 1H), 7.71 (t,  $J = 7.6$  Hz, 1H), 7.53 (t,  $J = 7.7$  Hz, 1H), 7.46 (q,  $J = 7.2$ , 6.5 Hz, 4H), 7.38 – 7.35 (m, 2H).  $^{13}\text{C NMR}$  (126 MHz,  $\text{CDCl}_3$ )  $\delta$  157.6 (d,  $J = 348.1$  Hz), 145.5 (d,  $J = 2.5$  Hz), 140.1, 133.9, 132.2 (d,  $J = 2.8$  Hz), 131.8 (d,  $J = 2.8$  Hz), 128.4, 128.3, 127.9, 127.6, 124.2 (d,  $J = 56.9$  Hz).  $^{19}\text{F NMR}$  (471 MHz,  $\text{CDCl}_3$ )  $\delta$  35.04. Data in accordance with the literature.<sup>1</sup>

### **Benzo[d][1,3]dioxole-5-carbonyl fluoride (3l)**

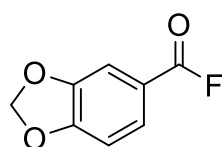

Yield: 98% (33.0 mg);  $^1\text{H NMR}$  (500 MHz,  $\text{CDCl}_3$ )  $\delta$  7.69 (dd,  $J = 8.2$ , 1.6 Hz, 1H), 7.43 (d,  $J = 1.6$  Hz, 1H), 6.92 (d,  $J = 8.2$  Hz, 1H), 6.12 (s, 2H).  $^{13}\text{C NMR}$  (126 MHz,  $\text{CDCl}_3$ )  $\delta$  156.9 (d,  $J = 340.1$  Hz),

153.8, 148.3 (d,  $J = 2.0$  Hz), 128.2 (d,  $J = 3.9$  Hz), 118.4 (d,  $J = 62.5$  Hz), 110.7 (d,  $J = 4.2$  Hz), 108.6, 102.4.  $^{19}\text{F}$  NMR (471 MHz,  $\text{CDCl}_3$ )  $\delta$  16.40. Data in accordance with the literature.<sup>6</sup>

### 2-naphthoyl fluoride (3m)

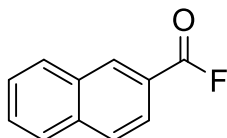

Yield: 95% (33.1 mg);  $^1\text{H}$  NMR (500 MHz,  $\text{CDCl}_3$ )  $\delta$  8.65 (s, 1H), 8.02 (d,  $J = 17.8$  Hz, 2H), 7.99 – 7.92 (m, 2H), 7.71 (t,  $J = 7.5$  Hz, 1H), 7.64 (t,  $J = 7.5$  Hz, 1H).  $^{13}\text{C}$  NMR (126 MHz,  $\text{CDCl}_3$ )  $\delta$  157.7 (d,  $J = 343.6$  Hz), 136.5, 134.0 (d,  $J = 3.2$  Hz), 132.3, 129.71, 129.66, 129.1, 128.0, 127.4, 125.6 (d,  $J = 4.2$  Hz), 122.0 (d,  $J = 60.5$  Hz).  $^{19}\text{F}$  NMR (471 MHz,  $\text{CDCl}_3$ )  $\delta$  18.08. Data in accordance with the literature.<sup>1</sup>

### 1-naphthoyl fluoride (3n)

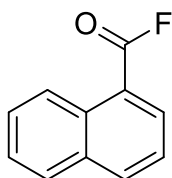

Yield: 92% (32.0 mg);  $^1\text{H}$  NMR (400 MHz,  $\text{CDCl}_3$ )  $\delta$  9.05 (d,  $J = 8.7$  Hz, 1H), 8.38 (d,  $J = 7.4$  Hz, 1H), 8.20 (d,  $J = 8.2$  Hz, 1H), 7.97 (d,  $J = 8.2$  Hz, 1H), 7.75 (t,  $J = 7.2$  Hz, 1H), 7.64 (t,  $J = 7.3$  Hz, 1H), 7.59 (t,  $J = 7.8$  Hz, 1H).  $^{13}\text{C}$  NMR (101 MHz,  $\text{CDCl}_3$ )  $\delta$  156.4 (d,  $J = 344.5$  Hz), 136.7, 133.9 (d,  $J = 4.0$  Hz), 133.7 (d,  $J = 2.0$  Hz), 132.1 (d,  $J = 7.2$  Hz), 129.2, 129.0, 127.0, 125.2, 124.5, 120.3 (d,  $J = 55.8$  Hz).  $^{19}\text{F}$  NMR (377 MHz,  $\text{CDCl}_3$ )  $\delta$  29.91. Data in accordance with the literature.<sup>1</sup>

### Cinnamoyl fluoride (5a)

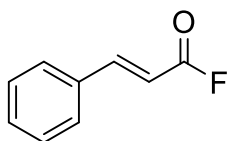

Yield: 72% (21.6 mg);  $^1\text{H}$  NMR (400 MHz,  $\text{CDCl}_3$ )  $\delta$  7.87 (d,  $J = 16.0$  Hz, 1H), 7.59 (dd,  $J = 7.9, 1.7$  Hz, 2H), 7.54 – 7.43 (m, 3H), 6.40 (dd,  $J = 16.0, 7.3$  Hz, 1H).  $^{13}\text{C}$  NMR (101 MHz,  $\text{CDCl}_3$ )  $\delta$  157.1 (d,  $J = 338.5$  Hz), 151.4 (d,  $J = 6.1$  Hz), 133.1, 131.9, 129.2, 128.8, 112.1 (d,  $J = 67.2$  Hz).  $^{19}\text{F}$  NMR (377 MHz,  $\text{CDCl}_3$ )  $\delta$  25.61. Data in accordance with the literature.<sup>7</sup>

### (*E*)-3-(4-methoxyphenyl)acryloyl fluoride (5b)

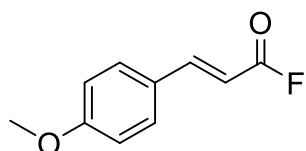

Yield: 97% (34.8 mg);  $^1\text{H}$  NMR (400 MHz,  $\text{CDCl}_3$ )  $\delta$  7.80 (d,  $J = 15.8$  Hz, 1H), 7.54 (d,  $J = 8.8$  Hz, 2H), 6.96 (d,  $J = 8.8$  Hz, 2H), 6.23 (dd,  $J = 15.9, 7.3$  Hz, 1H), 3.88 (s, 3H).  $^{13}\text{C}$  NMR (101 MHz,  $\text{CDCl}_3$ )  $\delta$  162.7, 157.6 (d,  $J = 336.6$  Hz), 151.1 (d,  $J = 6.3$  Hz), 130.7, 125.9, 114.6, 109.1 (d,  $J = 67.1$  Hz), 55.5.  $^{19}\text{F}$  NMR (377 MHz,  $\text{CDCl}_3$ )  $\delta$  24.39. Data in accordance with the literature.<sup>7</sup>

**(E)-3-(3,4-dimethoxyphenyl)acryloyl fluoride (5c)**

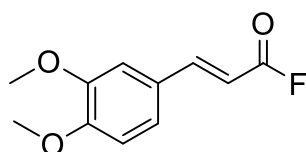

Yield: 93% (39.1 mg);  $^1\text{H}$  NMR (400 MHz,  $\text{CDCl}_3$ )  $\delta$  7.78 (d,  $J = 15.8$  Hz, 1H), 7.17 (dd,  $J = 8.3, 1.8$  Hz, 1H), 7.07 (d,  $J = 1.7$  Hz, 1H), 6.91 (d,  $J = 8.3$  Hz, 1H), 6.23 (dd,  $J = 15.8, 7.3$  Hz, 1H), 3.94 (d,  $J = 3.5$  Hz, 6H).  $^{13}\text{C}$  NMR (101 MHz,  $\text{CDCl}_3$ )  $\delta$  157.5 (d,  $J = 336.5$  Hz), 152.5, 151.4 (d,  $J = 6.2$  Hz), 149.4, 126.1, 124.0, 111.1, 109.9, 109.3 (d,  $J = 67.2$  Hz), 56.1, 56.0.  $^{19}\text{F}$  NMR (377 MHz,  $\text{CDCl}_3$ )  $\delta$  24.49. Data in accordance with the literature.<sup>8</sup>

**(E)-3-(4-fluorophenyl)acryloyl fluoride (5d)**

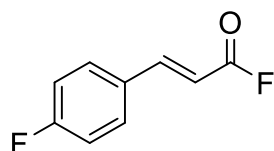

Yield: 60% (20.2 mg);  $^1\text{H}$  NMR (500 MHz,  $\text{CDCl}_3$ )  $\delta$  7.83 (d,  $J = 16.0$  Hz, 1H), 7.60 (dd,  $J = 8.7, 5.3$  Hz, 2H), 7.16 (t,  $J = 8.6$  Hz, 2H), 6.32 (d,  $J = 23.0$  Hz, 1H).  $^{13}\text{C}$  NMR (126 MHz,  $\text{CDCl}_3$ )  $\delta$  164.8 (d,  $J = 254.1$  Hz), 157.0 (d,  $J = 338.3$  Hz), 150.0 (d,  $J = 6.1$  Hz), 130.8 (d,  $J = 8.8$  Hz), 129.5 (d,  $J = 3.3$  Hz), 116.5 (d,  $J = 22.1$  Hz), 111.9 (dd,  $J = 67.8, 2.5$  Hz).  $^{19}\text{F}$  NMR (471 MHz,  $\text{CDCl}_3$ )  $\delta$  25.61, -106.62. GC-MS (EI):  $m/z = 168.2$  ( $\text{M}^+$ ).

**(E)-3-(benzo[d][1,3]dioxol-5-yl)acryloyl fluoride (5e)**

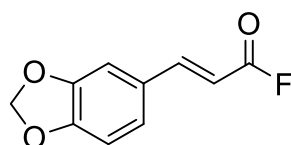

Yield: 90% (35.0 mg);  $^1\text{H}$  NMR (400 MHz,  $\text{CDCl}_3$ )  $\delta$  7.75 (d,  $J = 15.8$  Hz, 1H), 7.11 – 7.04 (m, 2H),

6.87 (d,  $J = 8.2$  Hz, 1H), 6.18 (dd,  $J = 15.8, 7.2$  Hz, 1H), 6.07 (s, 2H).  $^{13}\text{C}$  NMR (101 MHz,  $\text{CDCl}_3$ )  $\delta$  157.4 (d,  $J = 336.9$  Hz), 151.1, 151.0, 148.7, 127.6, 126.1, 109.7 (d,  $J = 67.3$  Hz), 108.8, 106.7, 102.0.  $^{19}\text{F}$  NMR (377 MHz,  $\text{CDCl}_3$ )  $\delta$  24.77. Data in accordance with the literature.<sup>9</sup>

**(E)-3-(naphthalen-1-yl)acryloyl fluoride (5f)**

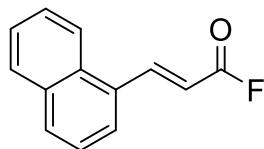

Yield: 75% (30.1 mg);  $^1\text{H}$  NMR (400 MHz,  $\text{CDCl}_3$ )  $\delta$  8.72 (d,  $J = 15.7$  Hz, 1H), 8.18 (d,  $J = 8.5$  Hz, 1H), 8.01 (d,  $J = 8.2$  Hz, 1H), 7.94 (d,  $J = 7.5$  Hz, 1H), 7.84 (d,  $J = 7.2$  Hz, 1H), 7.68 – 7.52 (m, 3H), 6.50 (dd,  $J = 15.7, 7.0$  Hz, 1H).  $^{13}\text{C}$  NMR (101 MHz,  $\text{CDCl}_3$ )  $\delta$  157.0 (d,  $J = 339.0$  Hz), 148.3 (d,  $J = 6.3$  Hz), 133.7, 132.2, 131.3, 130.2, 129.0, 127.6, 126.6, 125.9, 125.4, 122.9, 114.3 (d,  $J = 66.8$  Hz).  $^{19}\text{F}$  NMR (377 MHz,  $\text{CDCl}_3$ )  $\delta$  25.96. Data in accordance with the literature.<sup>10</sup>

**(E)-3-(furan-3-yl)acryloyl fluoride (5g)**

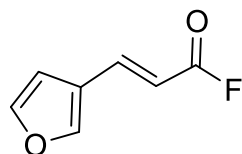

Yield: 60% (16.9 mg);  $^1\text{H}$  NMR (400 MHz,  $\text{CDCl}_3$ )  $\delta$  7.76 (d,  $J = 15.3$  Hz, 2H), 7.51 (s, 1H), 6.65 (s, 1H), 6.10 (dd,  $J = 15.8, 7.8$  Hz, 1H).  $^{13}\text{C}$  NMR (101 MHz,  $\text{CDCl}_3$ )  $\delta$  157.1 (d,  $J = 337.3$  Hz), 146.3, 145.1, 141.4 (d,  $J = 6.3$  Hz), 122.2, 111.7 (d,  $J = 67.6$  Hz), 107.2.  $^{19}\text{F}$  NMR (377 MHz,  $\text{CDCl}_3$ )  $\delta$  24.17. Data in accordance with the literature.<sup>11</sup>

**(E)-3-(thiophen-2-yl)acryloyl fluoride (5h)**

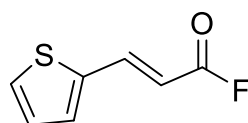

Yield: 70% (21.9 mg);  $^1\text{H}$  NMR (400 MHz,  $\text{CDCl}_3$ )  $\delta$  7.95 (d,  $J = 15.6$  Hz, 1H), 7.55 (d,  $J = 5.0$  Hz, 1H), 7.40 (d,  $J = 3.6$  Hz, 1H), 7.18 – 7.11 (m, 1H), 6.16 (dd,  $J = 15.6, 7.3$  Hz, 1H).  $^{13}\text{C}$  NMR (101 MHz,  $\text{CDCl}_3$ )  $\delta$  157.1 (d,  $J = 336.4$  Hz), 143.4 (d,  $J = 6.5$  Hz), 138.3, 133.3, 131.1, 128.6, 110.3 (d,  $J = 68.5$  Hz).  $^{19}\text{F}$  NMR (377 MHz,  $\text{CDCl}_3$ )  $\delta$  24.30. Data in accordance with the literature.<sup>12</sup>

**(E)-3-(thiophen-3-yl)acryloyl fluoride (5i)**



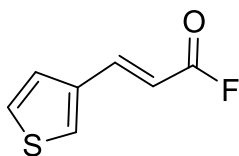

Yield: 64% (20.1 mg);  $^1\text{H}$  NMR (400 MHz,  $\text{CDCl}_3$ )  $\delta$  7.84 (d,  $J = 15.8$  Hz, 1H), 7.68 (d,  $J = 2.5$  Hz, 1H), 7.42 (dd,  $J = 5.0, 3.0$  Hz, 1H), 7.35 (d,  $J = 5.1$  Hz, 1H), 6.20 (dd,  $J = 15.8, 7.6$  Hz, 1H).  $^{13}\text{C}$  NMR (101 MHz,  $\text{CDCl}_3$ )  $\delta$  157.5 (d,  $J = 337.6$  Hz), 144.5 (d,  $J = 6.2$  Hz), 136.6, 131.0, 127.8, 125.1, 111.5 (d,  $J = 67.3$  Hz).  $^{19}\text{F}$  NMR (377 MHz,  $\text{CDCl}_3$ )  $\delta$  24.70. Data in accordance with the literature.<sup>12</sup>

#### (2E,4E)-5-phenylpenta-2,4-dienoyl fluoride (5j)

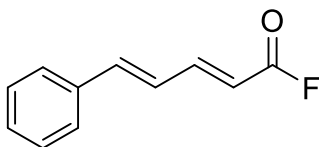

Yield: 64% (22.4 mg);  $^1\text{H}$  NMR (400 MHz,  $\text{CDCl}_3$ )  $\delta$  7.62 (dd,  $J = 15.2, 10.9$  Hz, 1H), 7.56 – 7.50 (m, 2H), 7.42 (q,  $J = 5.3$  Hz, 3H), 7.07 (d,  $J = 15.6$  Hz, 1H), 6.95 (dd,  $J = 15.5, 10.9$  Hz, 1H), 5.94 (dd,  $J = 15.2, 8.1$  Hz, 1H).  $^{13}\text{C}$  NMR (101 MHz,  $\text{CDCl}_3$ )  $\delta$  157.2 (d,  $J = 337.2$  Hz), 151.2 (d,  $J = 6.0$  Hz), 144.2, 135.3, 130.1, 129.0, 127.7, 125.2, 114.6 (d,  $J = 67.0$  Hz).  $^{19}\text{F}$  NMR (377 MHz,  $\text{CDCl}_3$ )  $\delta$  24.46. Data in accordance with the literature.<sup>13</sup>

## 4. Gram-Scale Reaction and Synthetic Application

### 4.1 Gram-Scale Reaction

A dry 100 mL flask equipped with a stirring bar was charged with N-trifluoromethylthiophthalimide (5.0 mmol, 1.23 g, 1 equiv.), carboxylic acid **1i** (10 mmol, 2.37 g, 2 equiv.), TBAI (185.0 mg, 0.5 mmol, 10 mol%) in glovebox. Anhydrous and degassed  $\text{CH}_3\text{CN}$  (50 mL) and  $\text{Et}_3\text{N}$  (0.7 mL, 1 equiv.) was added via syringe. The reaction mixture was stirred at 35 °C for 16 h. After the reaction is completed, the mixture was concentrated under vacuum and the product was purified by flash column chromatography on silica gel using hexane/EtOAc as eluent to give the product **3i** in 98% yield.

### 4.2 Synthetic Application

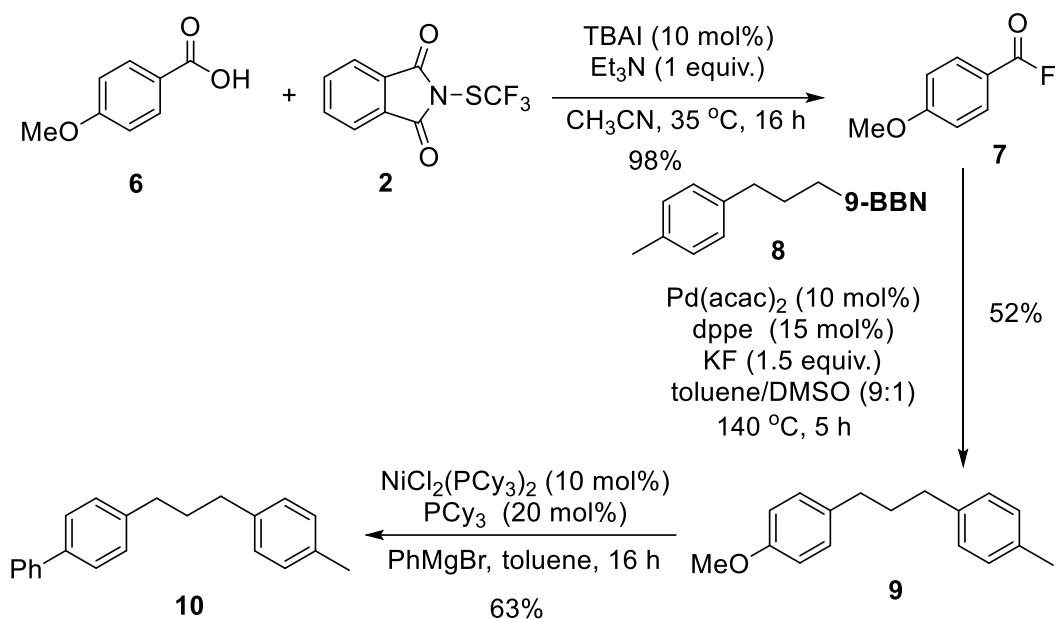

#### 4-methoxybenzoyl fluoride (7)

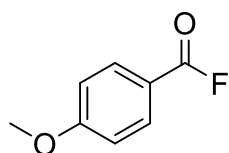

Acyl fluoride was synthesized according to the general procedure for the deoxygenative fluorination of carboxylic acids.  $^1\text{H NMR}$  (400 MHz,  $\text{CDCl}_3$ )  $\delta$  8.02 (d,  $J = 8.9$  Hz, 2H), 7.01 (d,  $J = 8.4$  Hz, 2H), 3.92 (s, 3H).  $^{13}\text{C NMR}$  (101 MHz,  $\text{CDCl}_3$ )  $\delta$  165.2, 157.3 (d,  $J = 339.8$  Hz), 133.8 (d,  $J = 4.0$  Hz), 116.9 (d,  $J = 61.8$  Hz), 114.4, 55.7.  $^{19}\text{F NMR}$  (377 MHz,  $\text{CDCl}_3$ )  $\delta$  15.98. Data in accordance with the literature.<sup>1</sup>

#### 1-methoxy-4-(3-(p-tolyl)propyl)benzene (9)

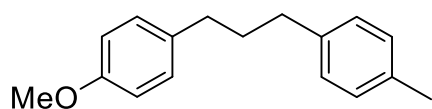

A dry 20 mL high pressure tube equipped with a stirring bar was charged with  $\text{Pd(acac)}_2$  (6.1 mg, 0.02 mmol, 10 mol %), dppe (12.0 mg, 0.03 mmol, 15 mol %), KF (17.4 mg, 0.3 mmol, 1.5 equiv.), toluene (0.8 mL), and DMSO (0.2 mL) in glovebox and the reaction mixture was stirred for 2 min at room temperature. Then alkyl 9-BBN **8** (0.32 mmol in 1 mL toluene, 1.6 equiv., generated from the reaction of 0.16 mmol 9-BBN-dimer and 0.32 mmol alkene in dry toluene at 80 °C for 3 h) and acyl fluoride **7** (30.8 mg, 0.2 mmol, 1.0 equiv.) were added sequentially. The reaction mixture was stirred at 140 °C for 5 h. After the mixture was cooled to room temperature, quenched with saturated  $\text{NH}_4\text{Cl}$ , and extracted with EtOAc. The combined organic extracts were dried over anhydrous  $\text{Na}_2\text{SO}_4$ , and

evaporated under vacuum to obtain the crude product which was purified by column chromatography (EtOAc:hexane) on silica gel to afford the desired products **9** in 52% yield (25.1 mg).<sup>14</sup> <sup>1</sup>H NMR (400 MHz, CDCl<sub>3</sub>) δ 7.19 – 7.09 (m, 6H), 6.88 (d, *J* = 8.5 Hz, 2H), 3.84 (s, 3H), 2.64 (td, *J* = 7.7, 4.5 Hz, 4H), 2.37 (s, 3H), 1.96 (p, *J* = 7.7 Hz, 2H). <sup>13</sup>C NMR (101 MHz, CDCl<sub>3</sub>) δ 157.7, 139.3, 135.1, 134.5, 129.3, 129.0, 128.4, 113.7, 55.3, 35.0, 34.5, 33.3, 21.0. HRMS (APPI FT-ICR MS) for C<sub>17</sub>H<sub>20</sub>O: calculated for [M]<sup>+</sup> 240.15087, found 240.15090.

#### 4-(3-(*p*-tolyl)propyl)-1,1'-biphenyl (**10**)

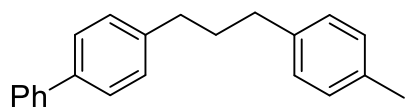

A dry 20 mL high pressure tube equipped with a stirring bar was charged with NiCl<sub>2</sub>(PCy<sub>3</sub>)<sub>2</sub> (13.8 mg, 0.02 mmol, 10 mol %), PCy<sub>3</sub> (11.2 mg, 0.04 mmol, 20 mol %), aryl methyl ether **9** (48.0 mg, 0.2 mmol, 1 equiv.), and toluene (1.4 mL) in glovebox. Then PhMgBr (0.6 ml, 0.6 mmol, 3 equiv., 1 M in THF) was added and the reaction mixture was stirred at 100 °C for 16 h. After the mixture was cooled to room temperature, quenched with saturated NH<sub>4</sub>Cl, and extracted with EtOAc. The combined organic extracts were dried over anhydrous Na<sub>2</sub>SO<sub>4</sub>, and evaporated under vacuum to obtain the crude product which was purified by column chromatography (EtOAc:hexane) on silica gel to afford the desired products **10** in 63% yield (36.2 mg).<sup>15</sup> <sup>1</sup>H NMR (400 MHz, CDCl<sub>3</sub>) δ 7.65 (d, *J* = 7.6 Hz, 2H), 7.58 (d, *J* = 8.0 Hz, 2H), 7.49 (t, *J* = 7.7 Hz, 2H), 7.38 (t, *J* = 7.3 Hz, 1H), 7.32 (d, *J* = 8.0 Hz, 2H), 7.16 (s, 4H), 2.73 (dt, *J* = 15.5, 7.7 Hz, 4H), 2.39 (s, 3H), 2.04 (p, *J* = 7.7 Hz, 2H). <sup>13</sup>C NMR (101 MHz, CDCl<sub>3</sub>) δ 141.6, 141.2, 139.2, 138.7, 135.2, 129.1, 128.92, 128.86, 128.76, 128.4, 127.1, 127.0, 35.1, 33.1, 21.6, 21.1. HRMS (APPI FT-ICR MS) for C<sub>22</sub>H<sub>22</sub>: calculated for [M]<sup>+</sup> 286.1716, found 286.1717.

## 5. References

1. Y. Liang, Z. Zhao, A. Taya and N. Shibata, Acyl Fluorides from Carboxylic Acids, Aldehydes, or Alcohols under Oxidative Fluorination, *Org. Lett.*, 2021, **23**, 847-852.
2. Y. Ogiwara, Y. Sakurai, H. Hattori and N. Sakai, Palladium-catalyzed reductive conversion of acyl fluorides via ligand-controlled decarbonylation, *Org. Lett.*, 2018, **20**, 4204-4208.
3. S. T. Keaveney and F. Schoenebeck, Palladium-Catalyzed Decarbonylative Trifluoromethylation of Acid Fluorides, *Angew. Chem. Int. Ed.*, 2018, **57**, 4073-4077.
4. T. Scattolin, K. Deckers and F. Schoenebeck, Direct synthesis of acyl fluorides from carboxylic acids with the bench-stable solid reagent (Me<sub>4</sub>N) SCF<sub>3</sub>, *Org. Lett.*, 2017, **19**, 5740-5743.
5. Q. Y. Meng, N. Döben and A. Studer, Cooperative NHC and Photoredox Catalysis for the Synthesis of  $\beta$ -Trifluoromethylated Alkyl Aryl Ketones, *Angew. Chem. Int. Ed.*, 2020, **59**, 19956-19960.
6. Z. Wang, X. Wang and Y. Nishihara, Nickel-catalysed decarbonylative borylation of acyl fluorides, *Chem. Commun.*, 2018, **54**, 13969-13972.
7. C. J. Smedley, A. S. Barrow, C. Spiteri, M. C. Giel, P. Sharma and J. E. Moses, Sulfur–Fluoride Exchange (SuFEx)-Mediated Synthesis of Sterically Hindered and Electron-Deficient Secondary and Tertiary Amides via Acyl Fluoride Intermediates, *Chem. Eur. J.*, 2017, **23**, 9990-9995.
8. A. Levens, C. Zhang, L. Candish, C. M. Forsyth and D. W. Lupton, Enantioselective N-heterocyclic carbene catalyzed diene regenerative (4+ 2) annulation, *Org. Lett.*, 2015, **17**, 5332-5335.
9. D. Hadjipavlou-Litina, G. E. Magoulas, M. Krokidis and D. Papaioannou, Syntheses and evaluation of the antioxidant activity of acitretin analogs with amide bond (s) in the polyene spacer, *European journal of medicinal chemistry*, 2010, **45**, 298-310.
10. X. Wang, F. Wang, F. Huang, C. Ni and J. Hu, Deoxyfluorination of Carboxylic Acids with CpFluor: Access to Acyl Fluorides and Amides, *Org. Lett.*, 2021, **23**, 1764-1768.
11. E. Bappert, P. Müller and G. C. Fu, Asymmetric [3+ 2] annulations catalyzed by a planar-chiral derivative of DMAP, *Chem. Commun.*, 2006, 2604-2606.
12. F. Tellier and R. Sauvêtre, Stereoselective synthesis of 1-bromo-(or 1-chloro-) 1, 1-difluoro-2-alkenes, *J. Fluorine Chem.*, 1996, **76**, 79-82.
13. L. Candish, C. M. Forsyth and D. W. Lupton, N-tert-Butyl Triazolylidenes: Catalysts for the Enantioselective (3+ 2) Annulation of  $\alpha$ ,  $\beta$ -Unsaturated Acyl Azoliums, *Angew. Chem. Int. Ed.*, 2013, **52**, 9149-9152.
14. L. Fu, Q. Chen, Z. Wang and Y. Nishihara, Palladium-Catalyzed Decarbonylative Alkylation of Acyl Fluorides, *Org. Lett.*, 2020, **22**, 2350-2353.
15. J. W. Dankwardt, Nickel-Catalyzed Cross-Coupling of Aryl Grignard Reagents with Aromatic Alkyl Ethers: An Efficient Synthesis of Unsymmetrical Biaryls, *Angew. Chem. Int. Ed.*, 2004, **43**, 2428-2432.

## 6. Copies of NMR Spectra

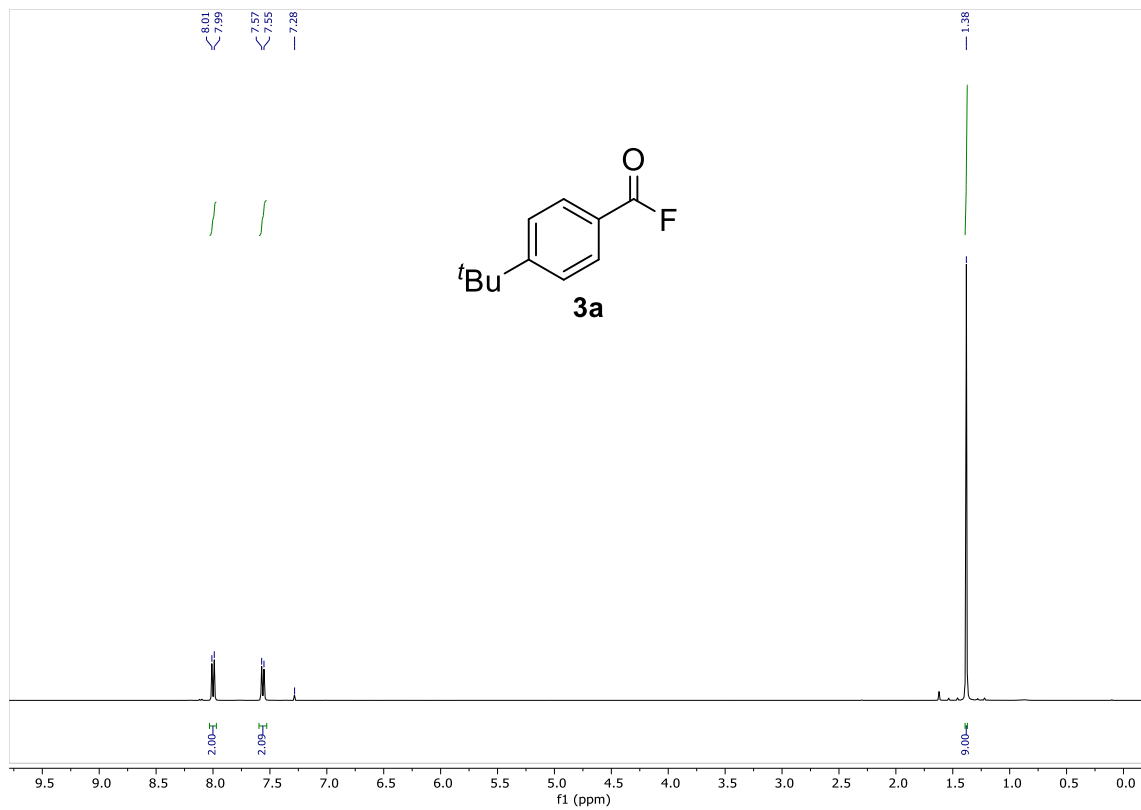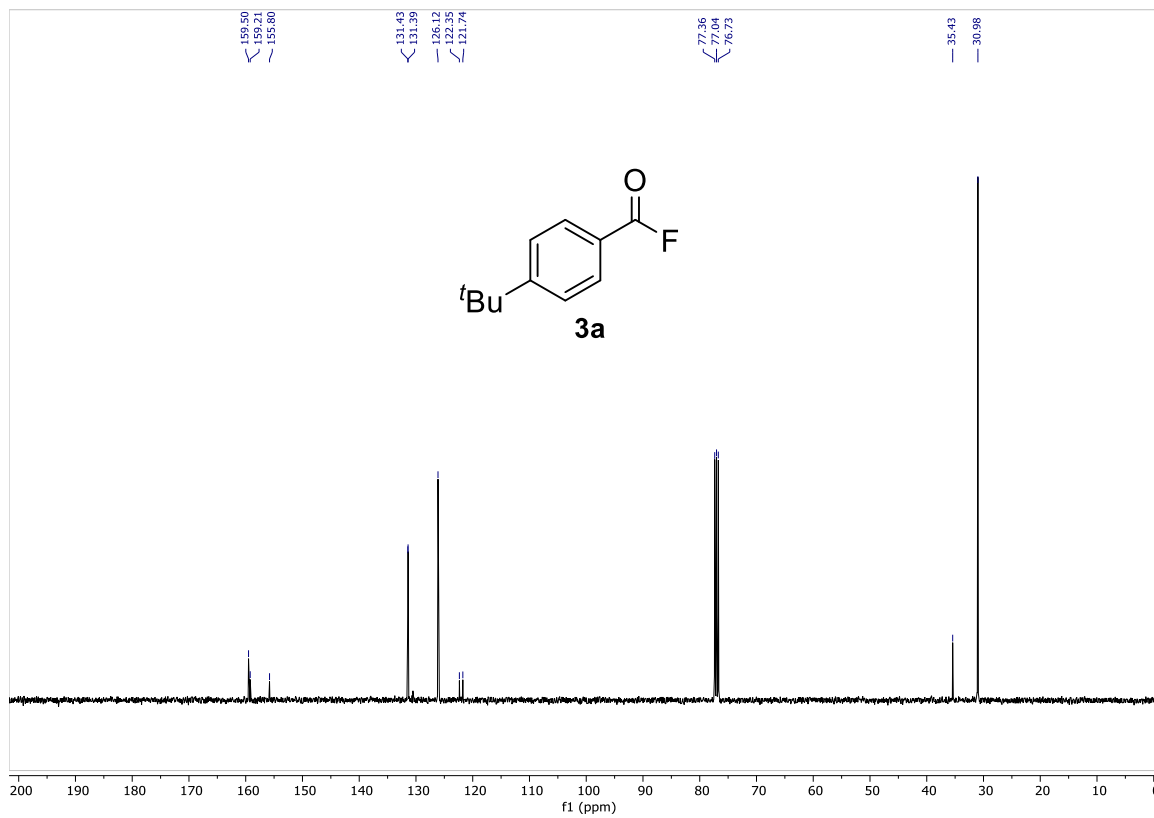

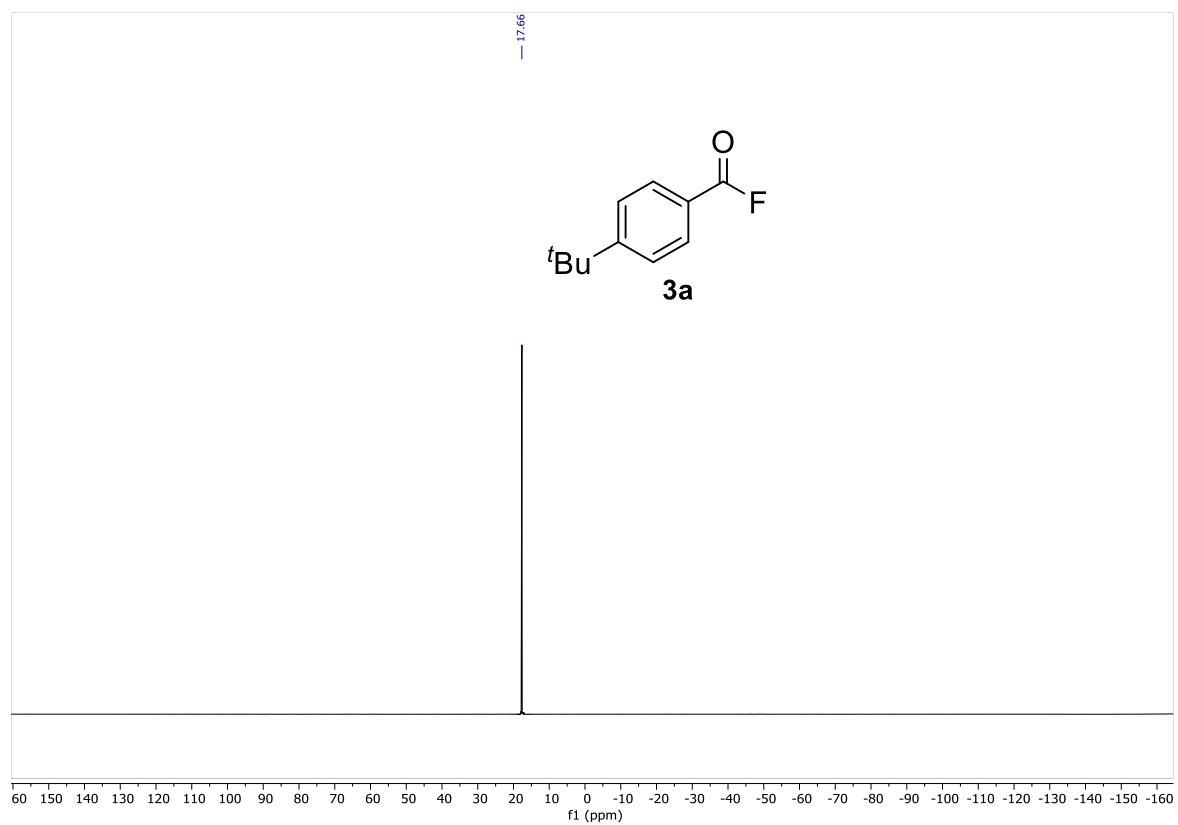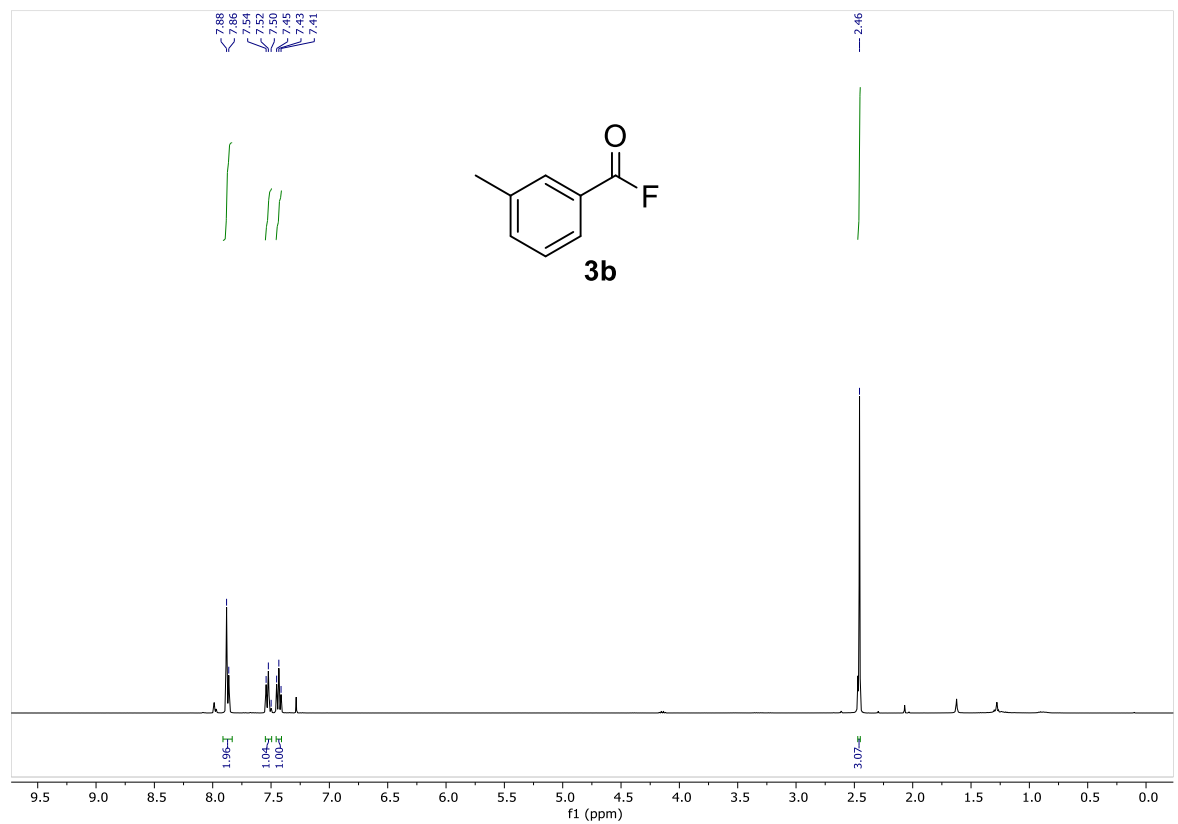

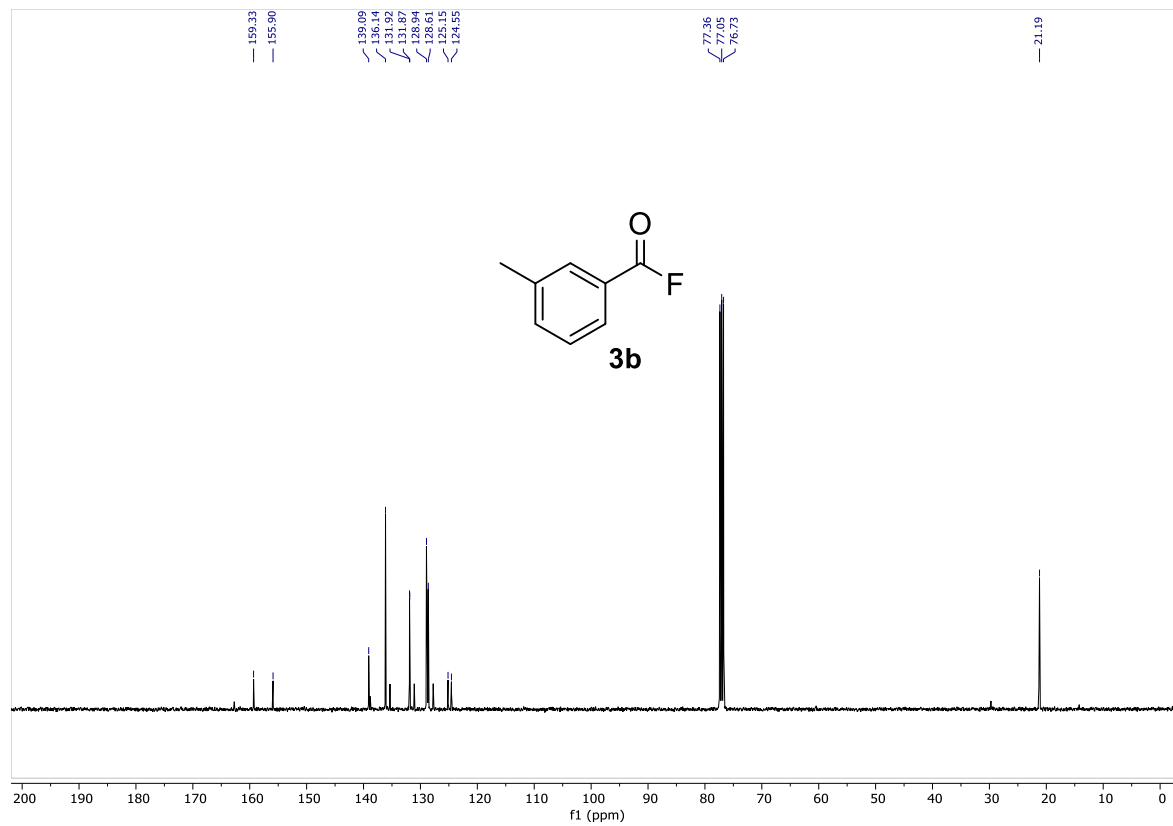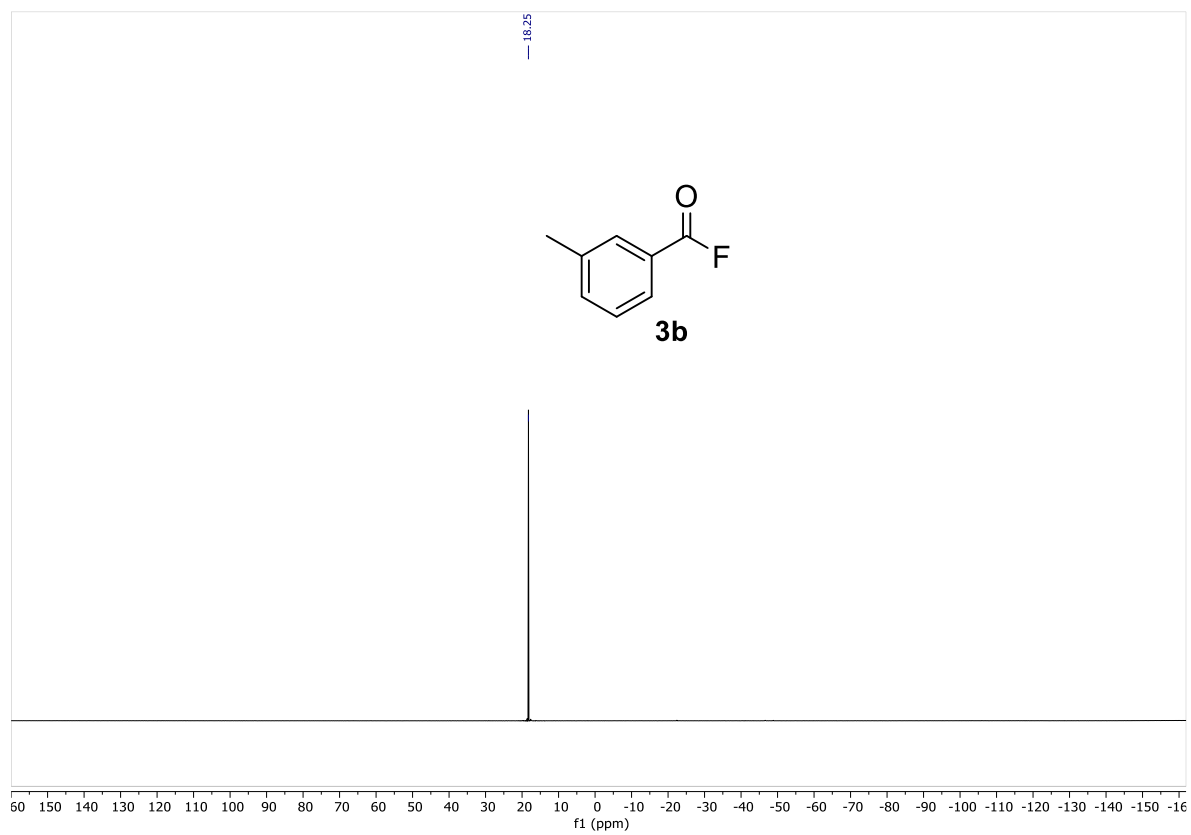

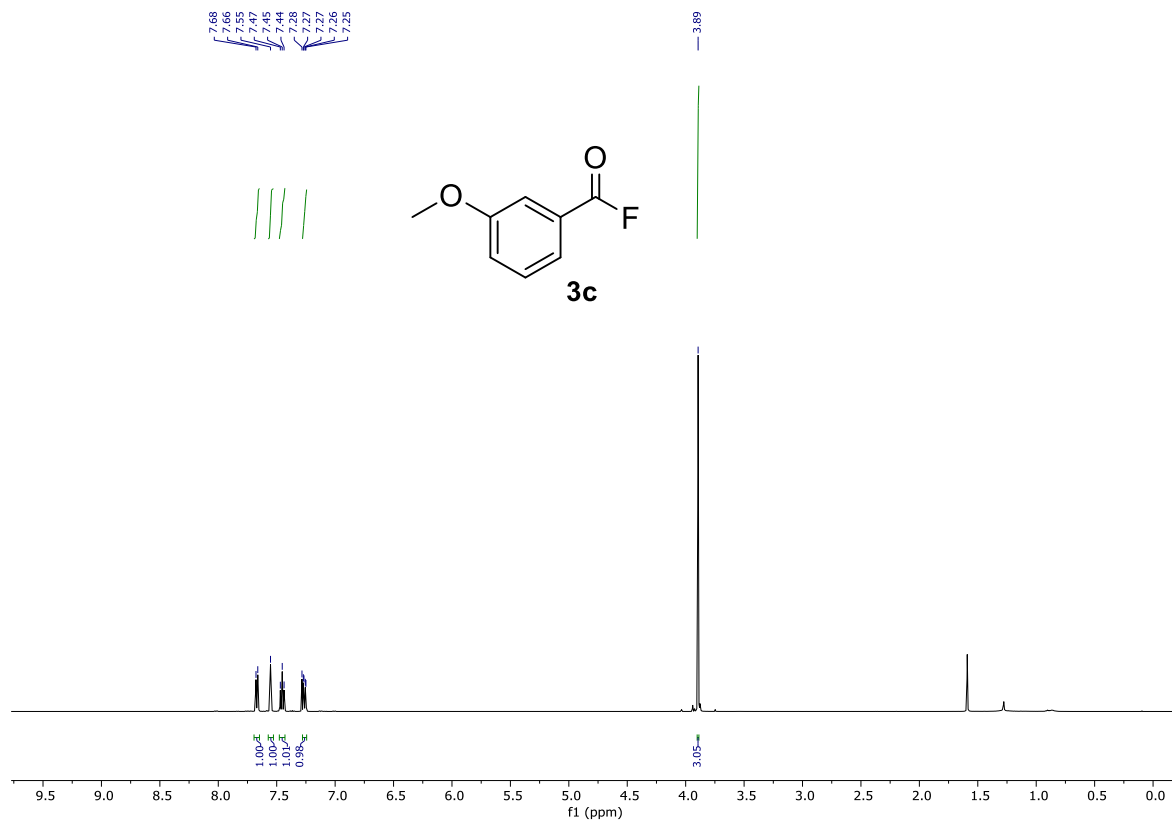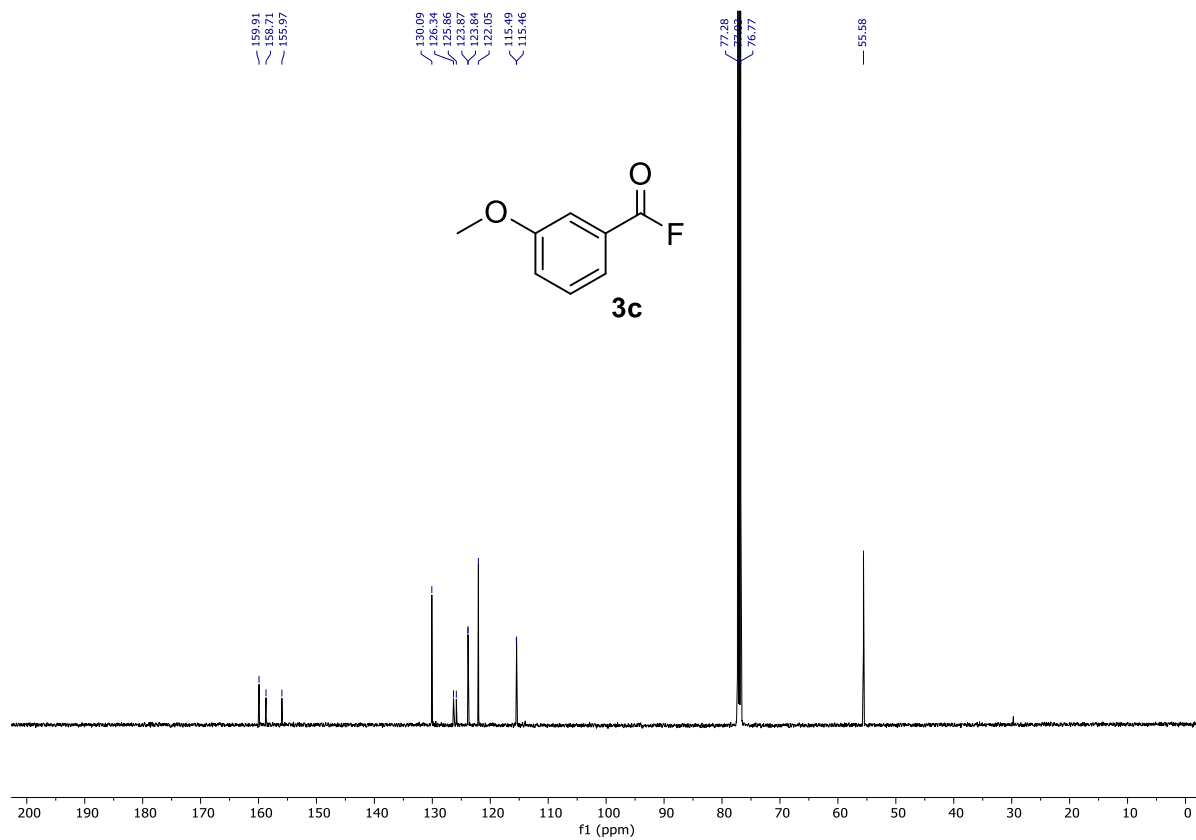



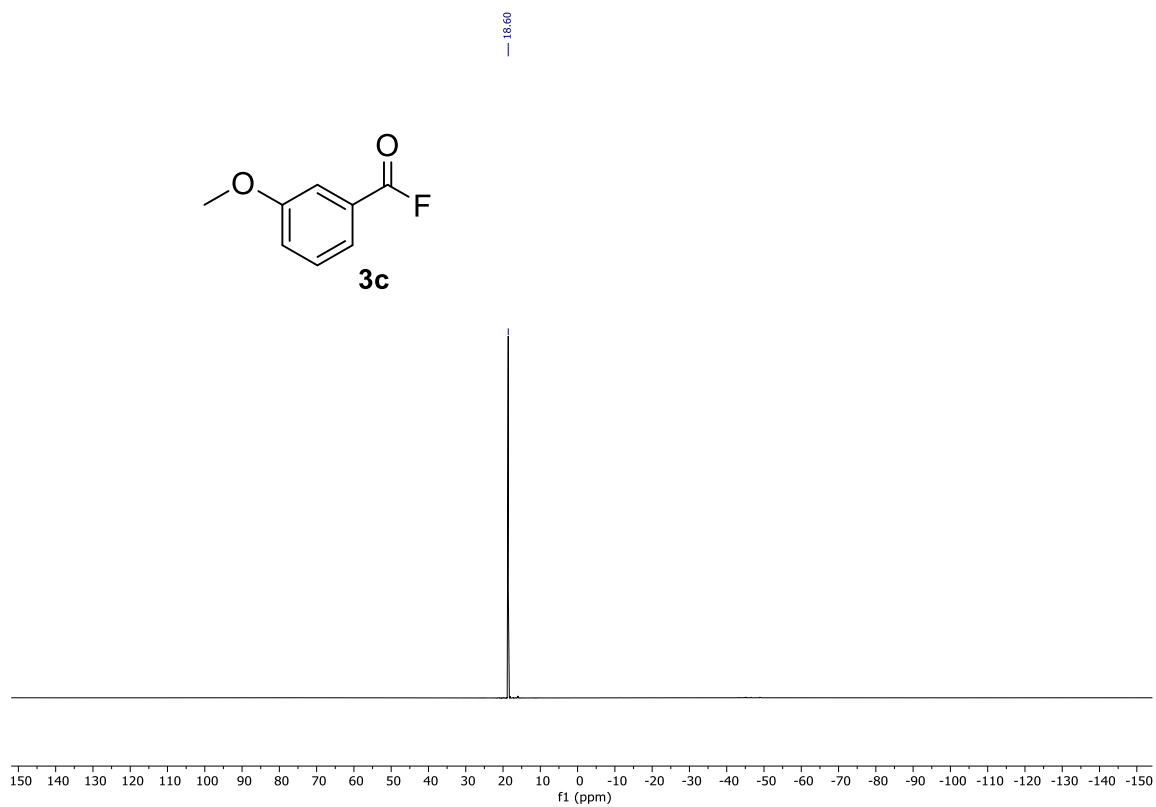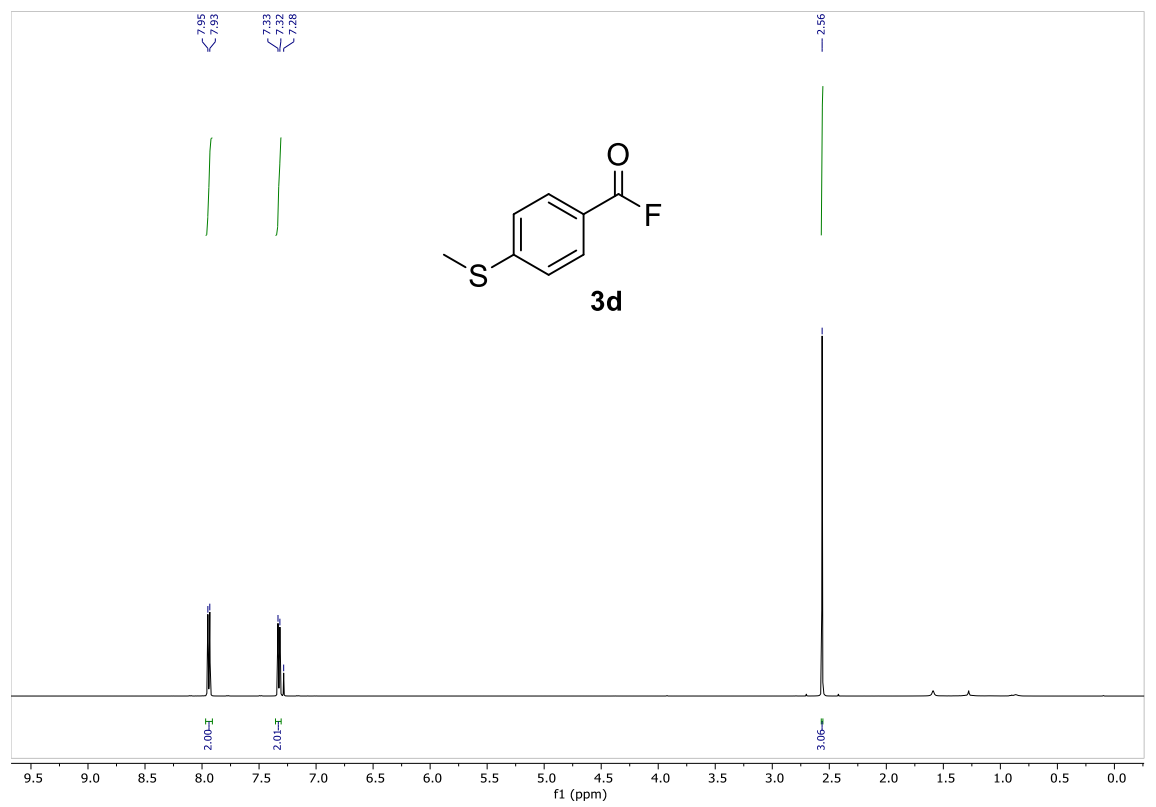

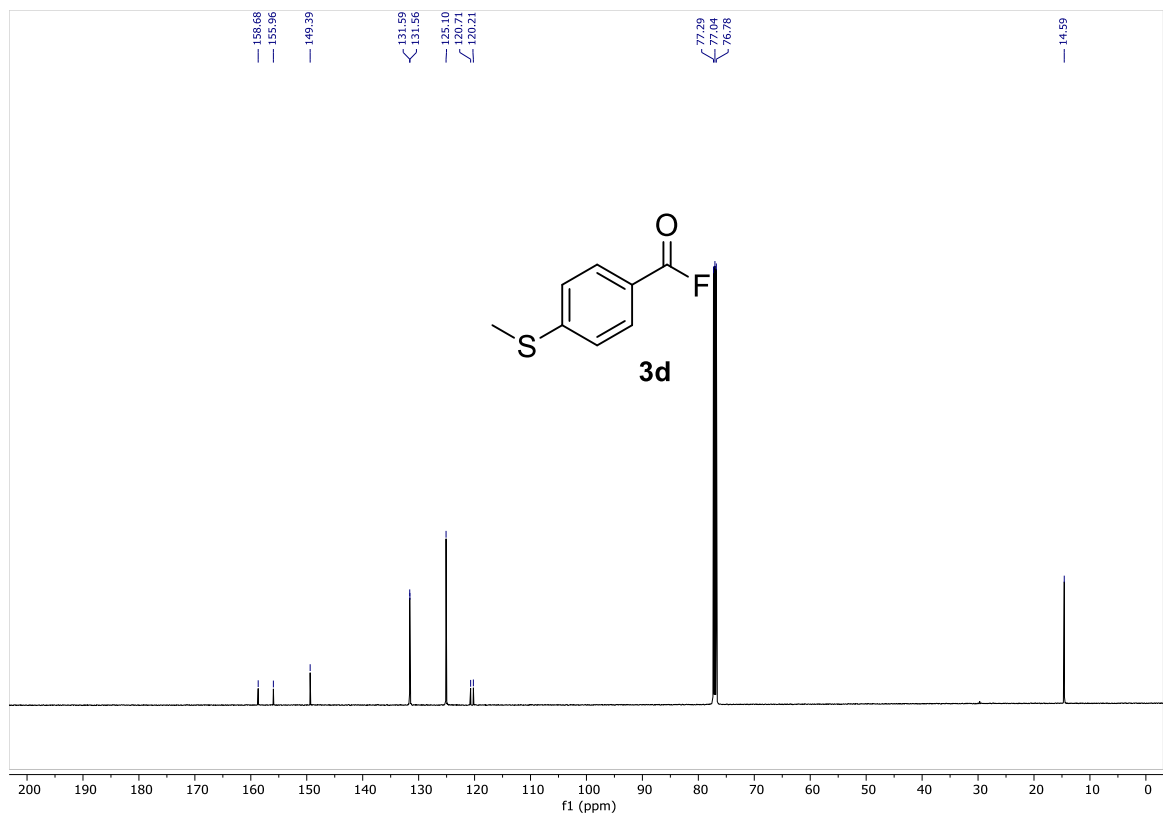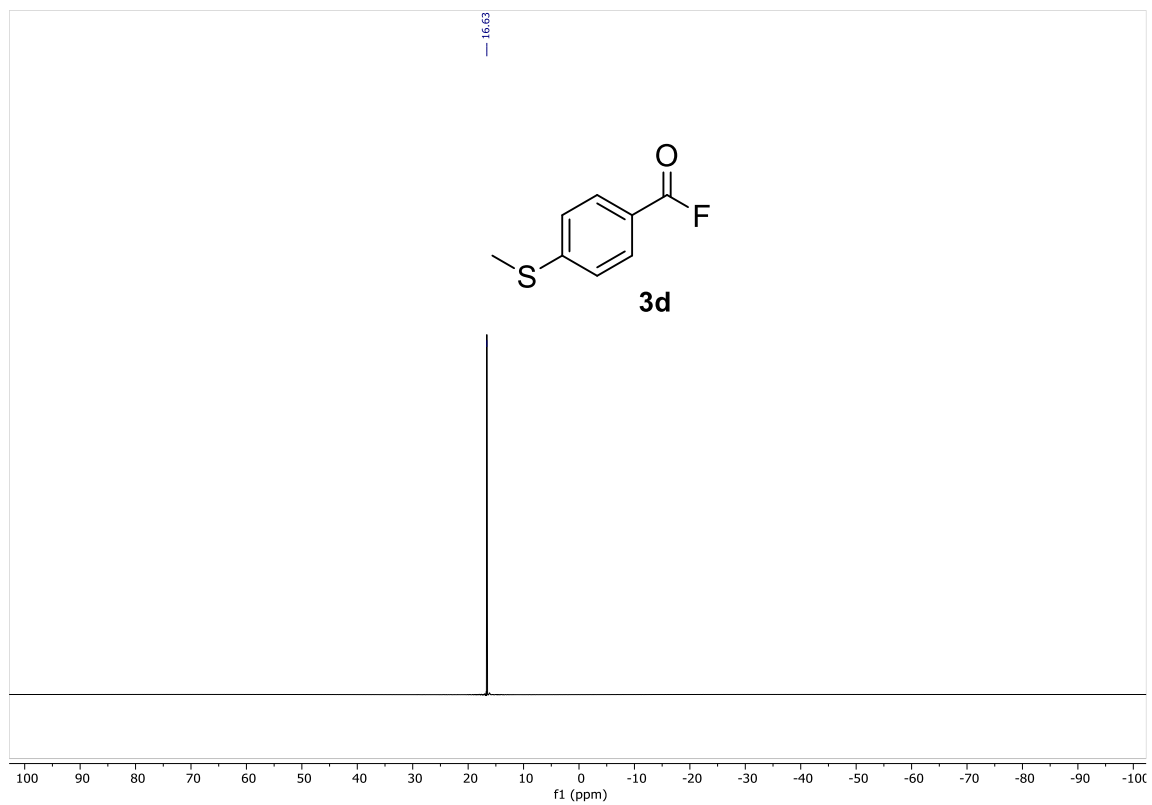

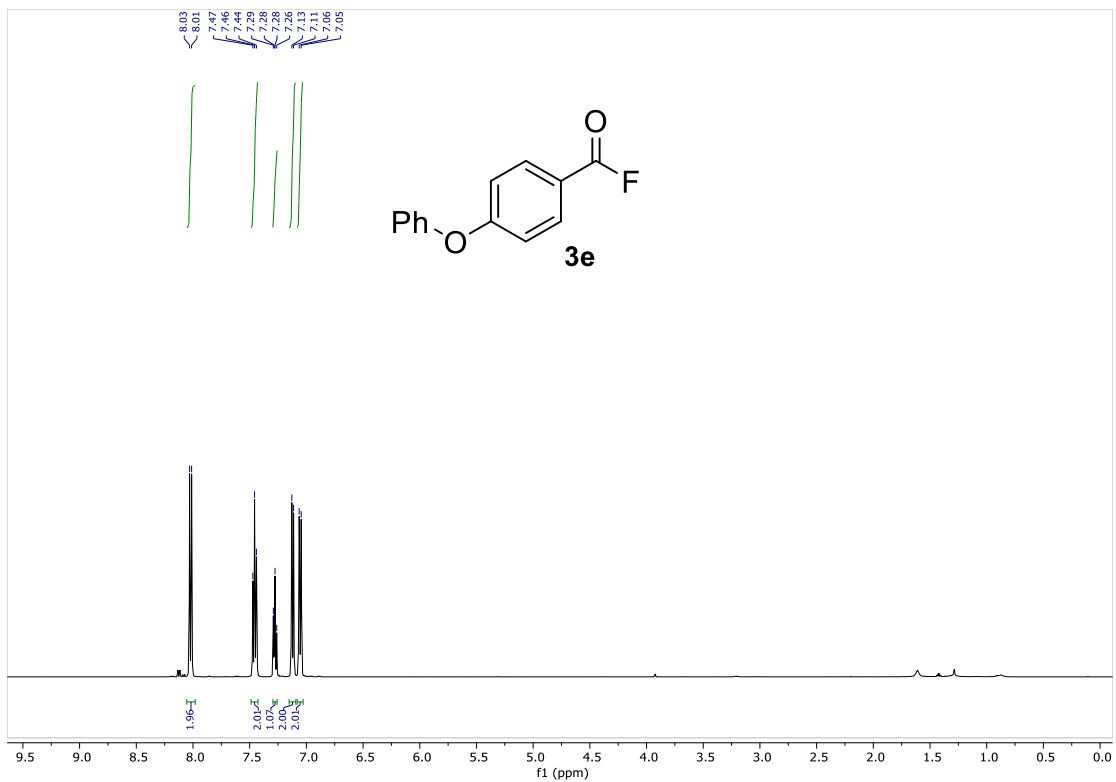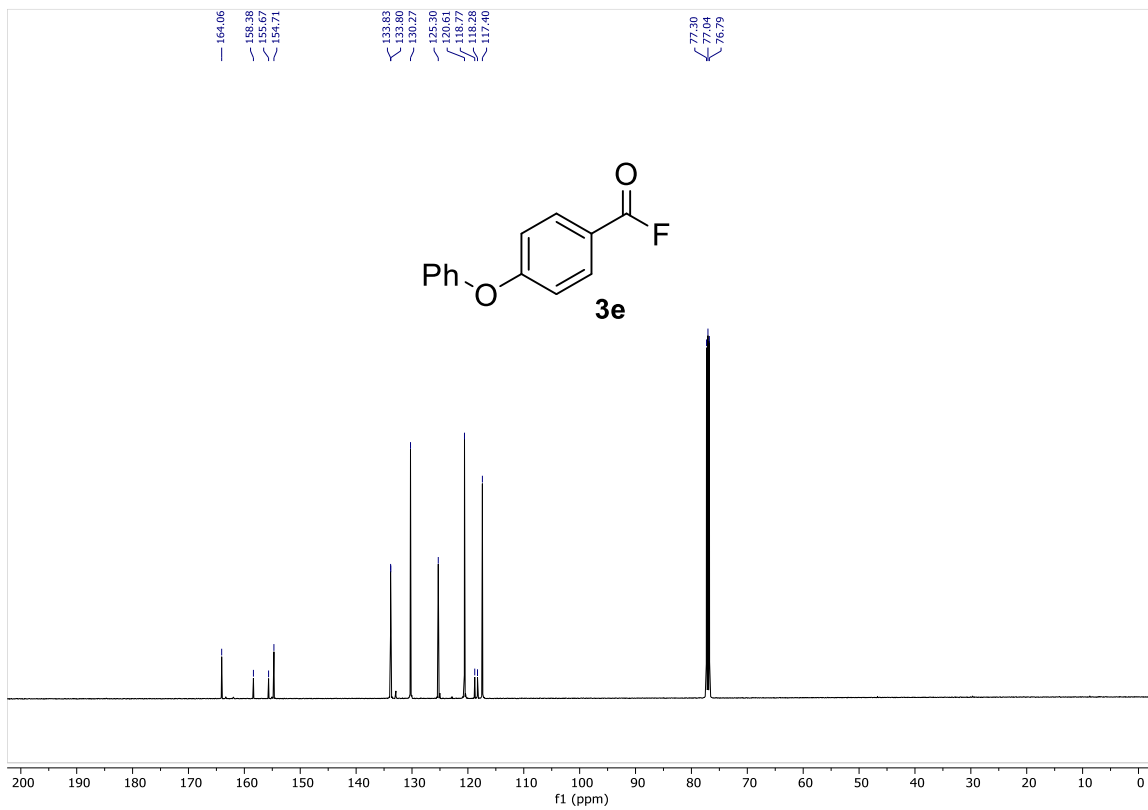

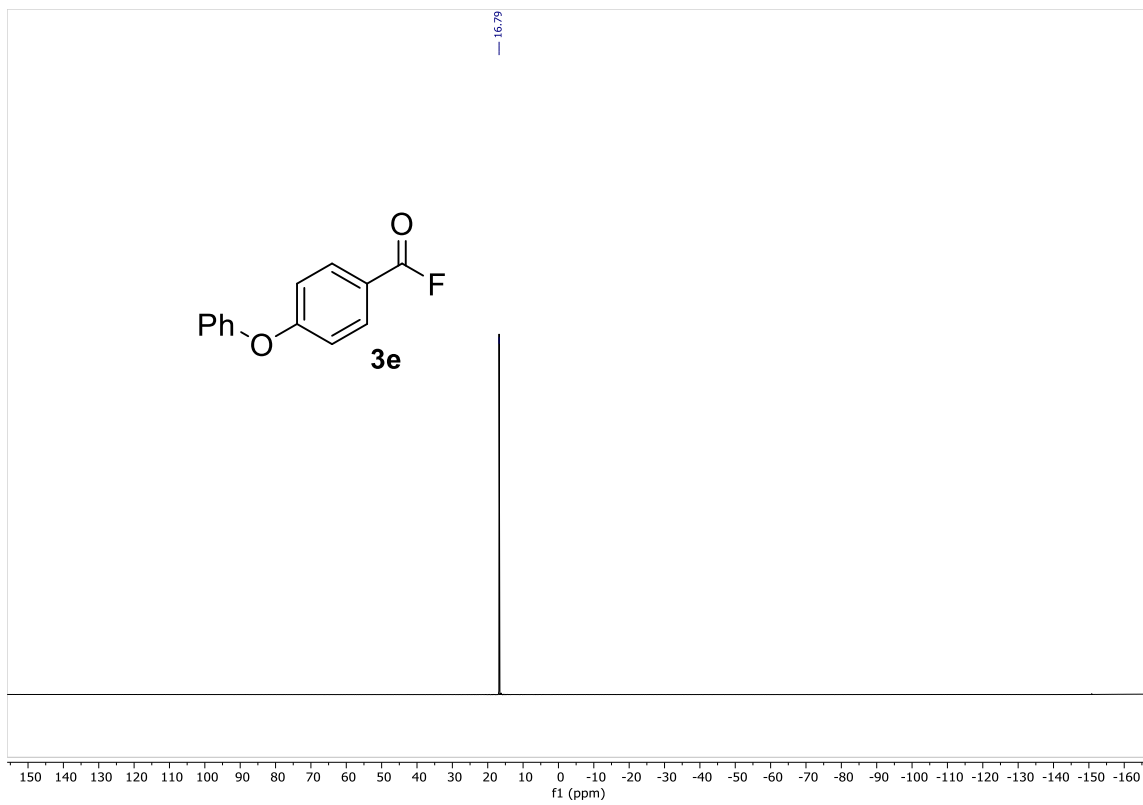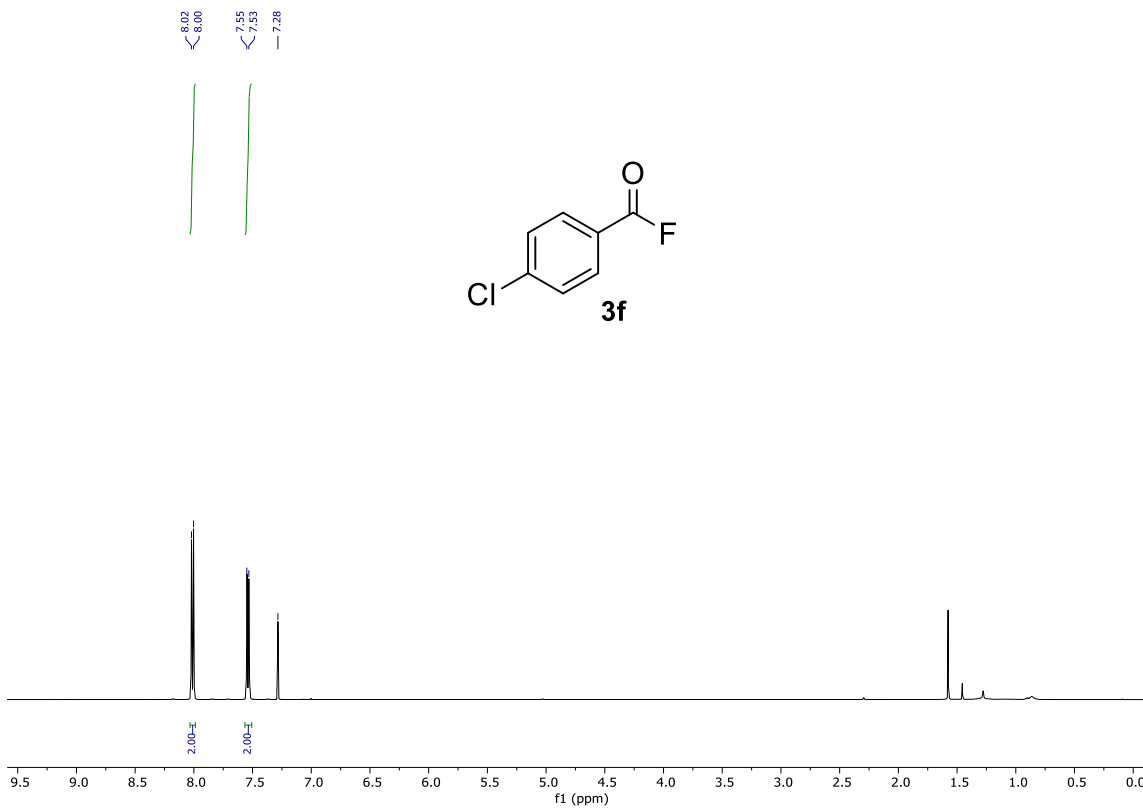

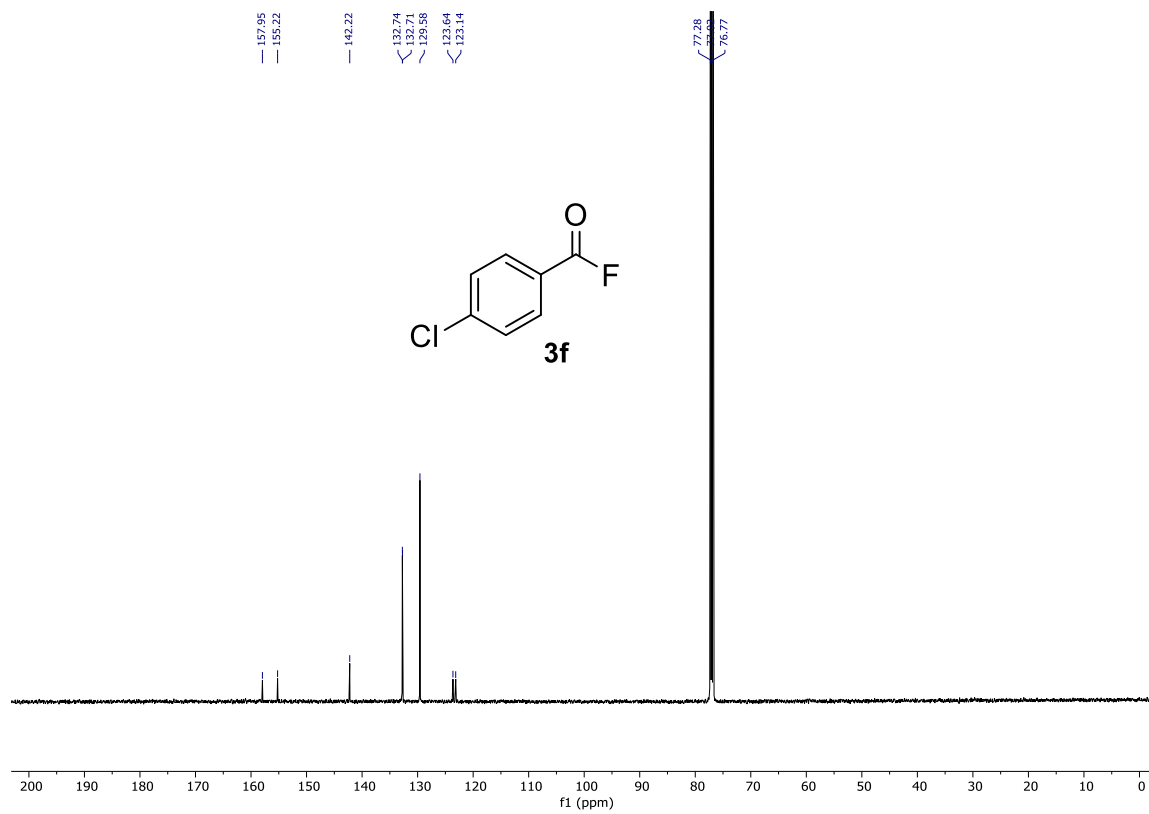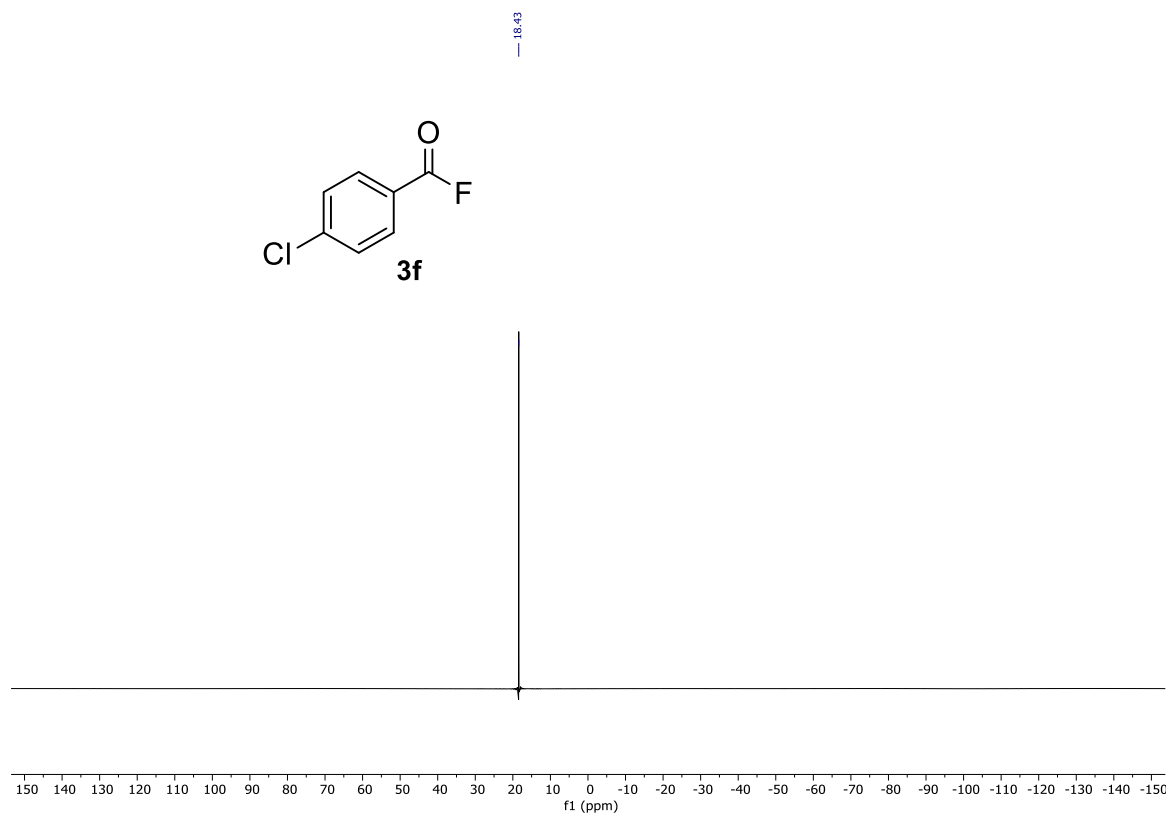

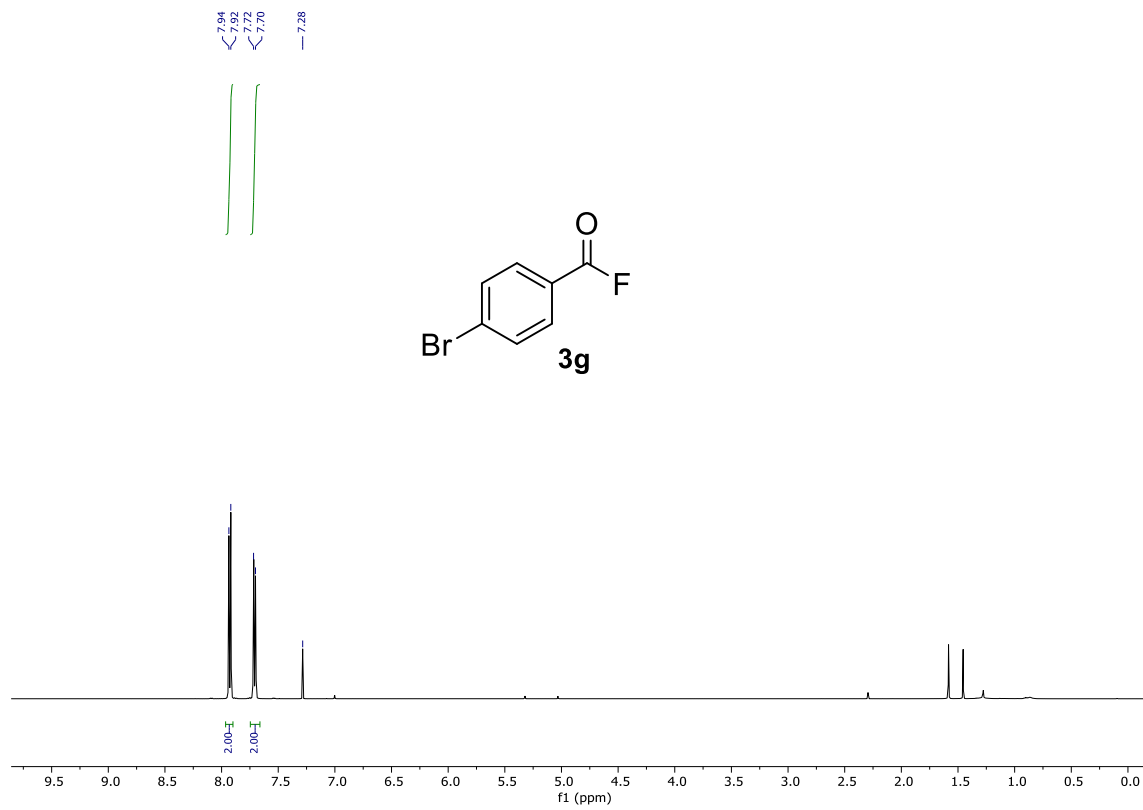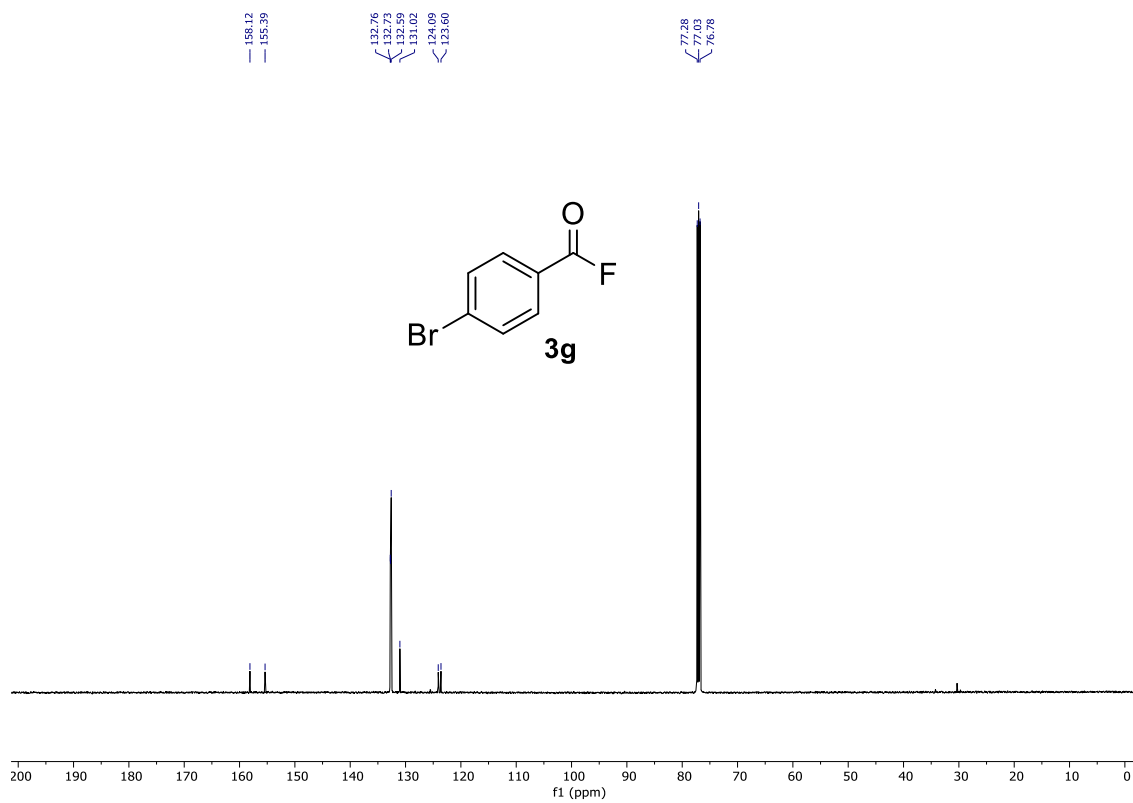

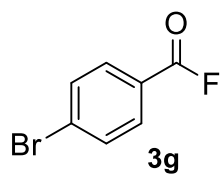

— 18.43

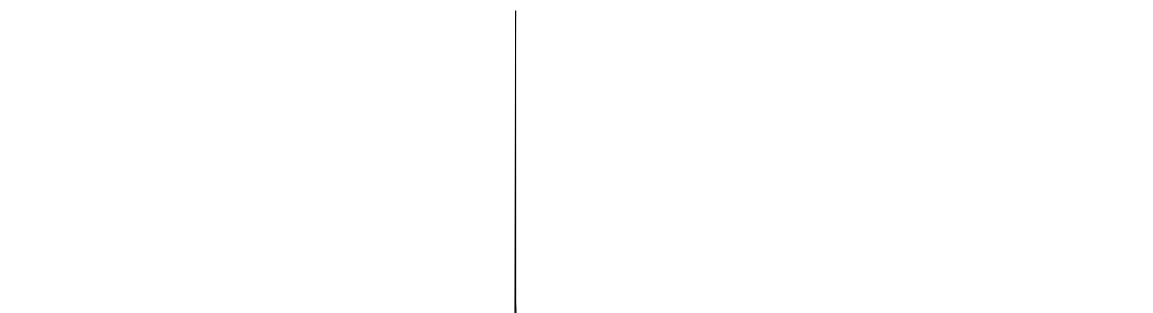

150 140 130 120 110 100 90 80 70 60 50 40 30 20 10 0 -10 -20 -30 -40 -50 -60 -70 -80 -90 -100 -110 -120 -130 -140 -150  
f1 (ppm)

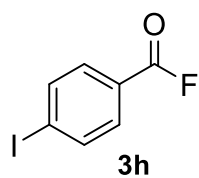

7.94  
7.77  
7.75  
— 7.28

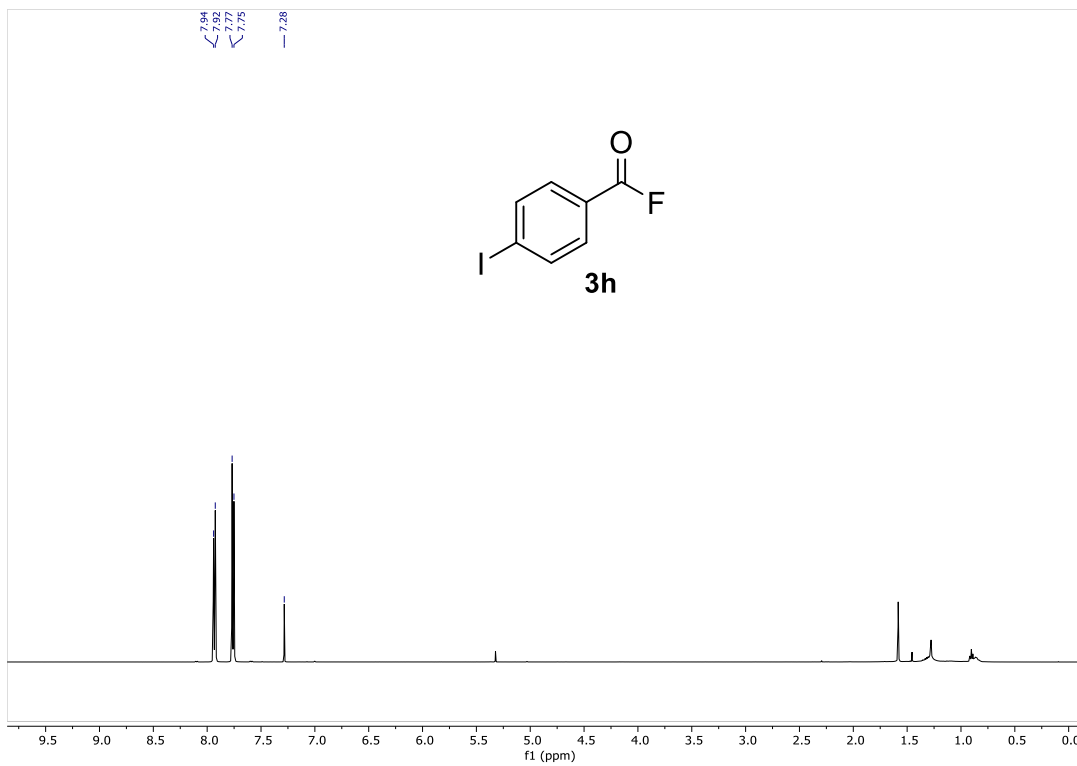

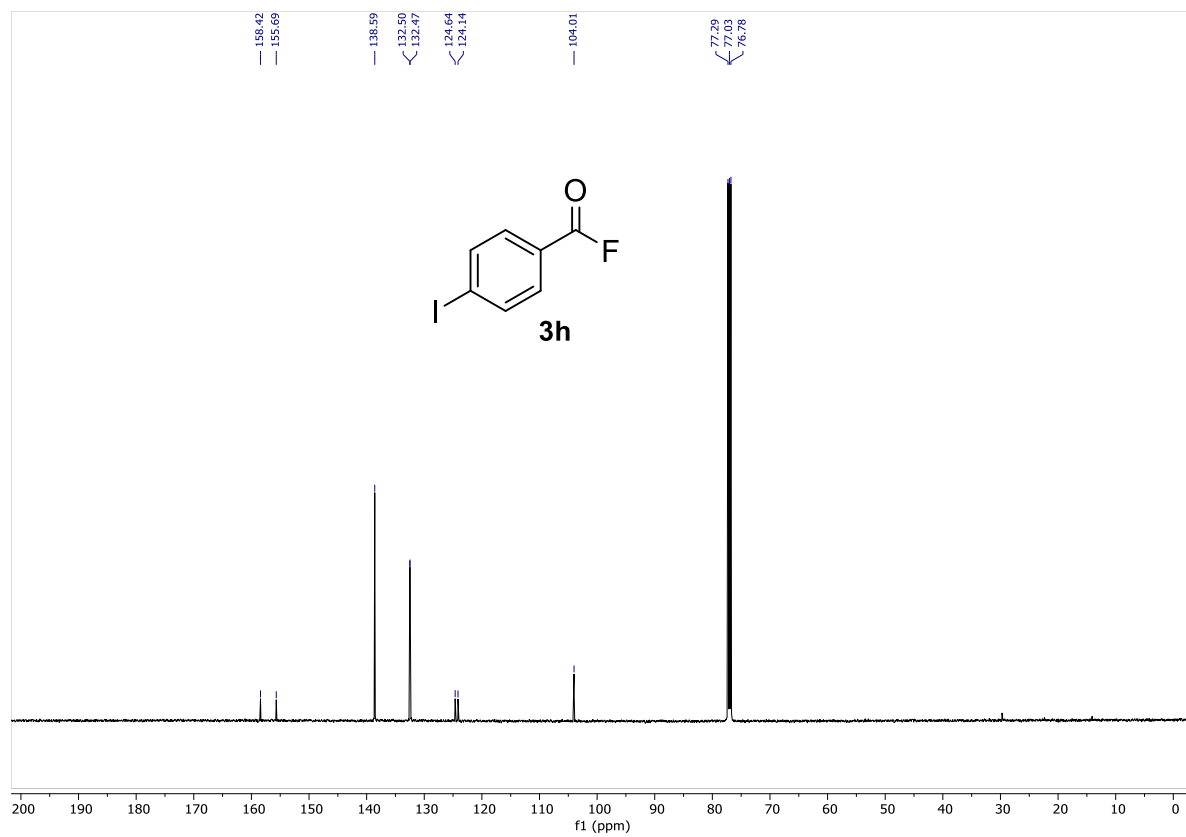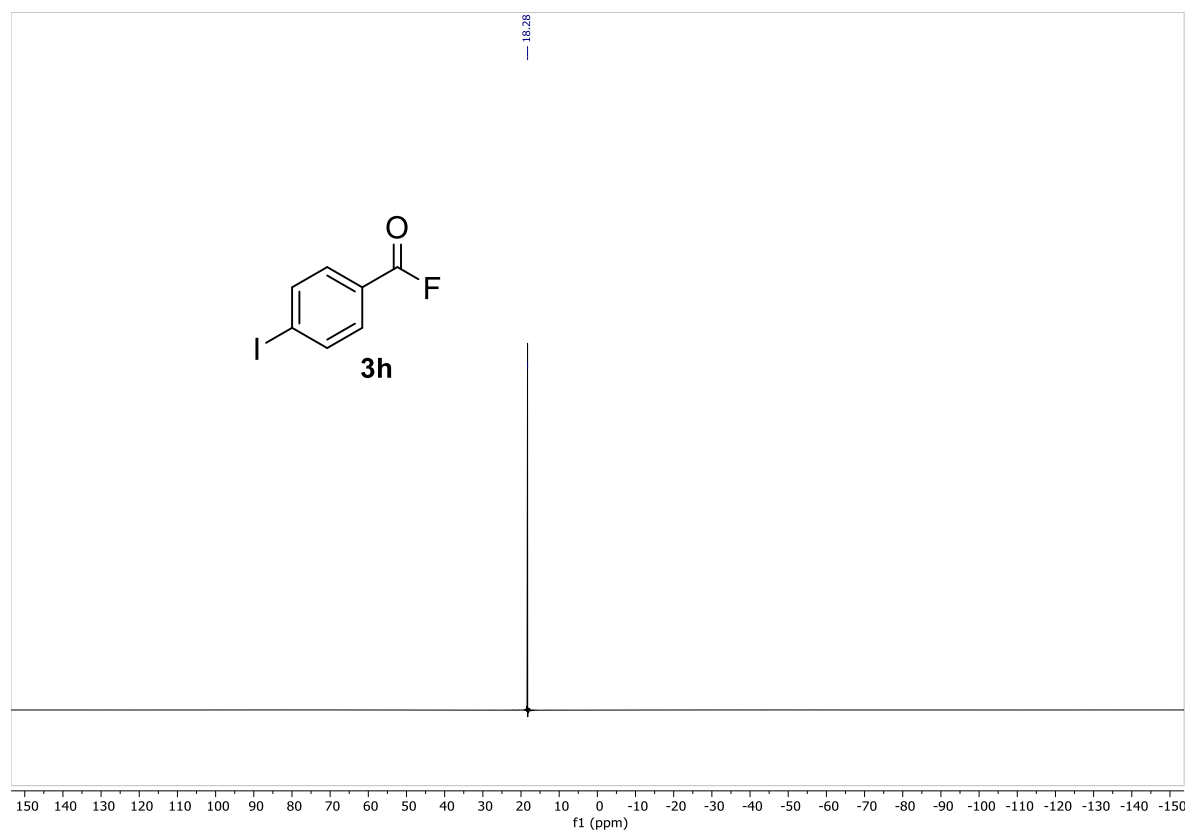



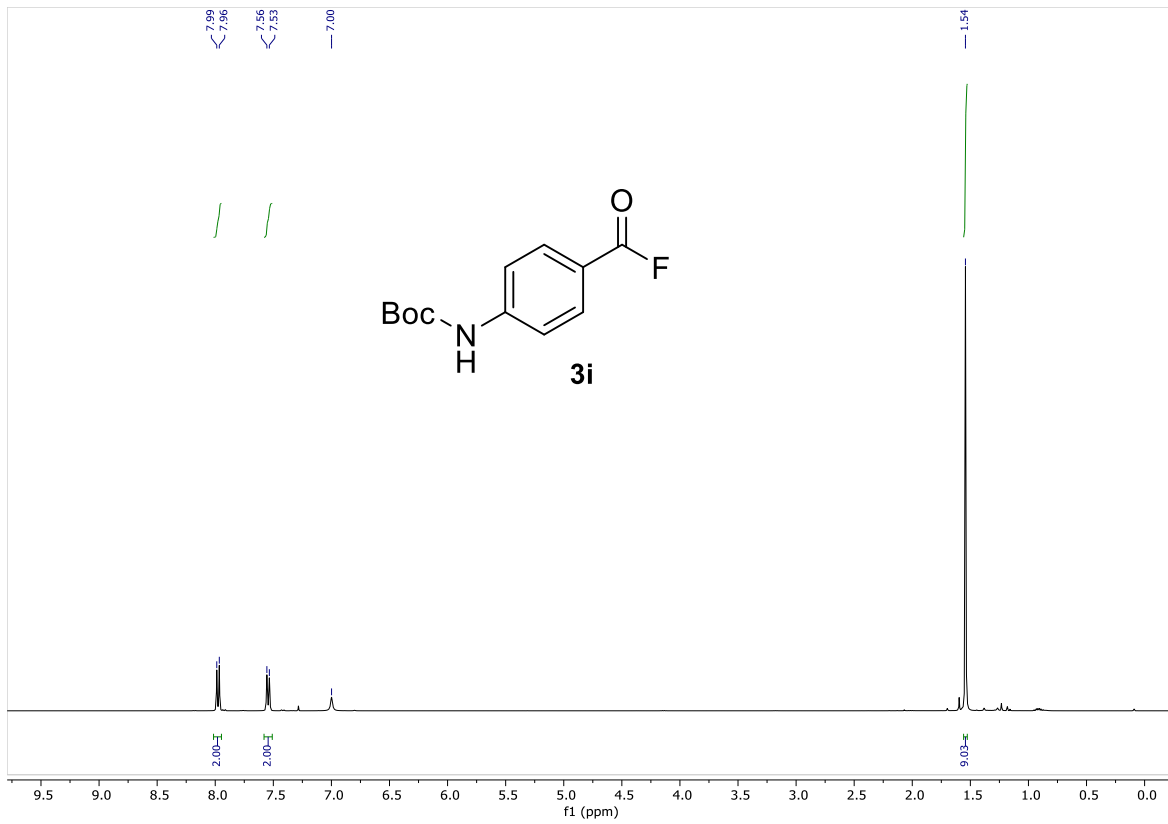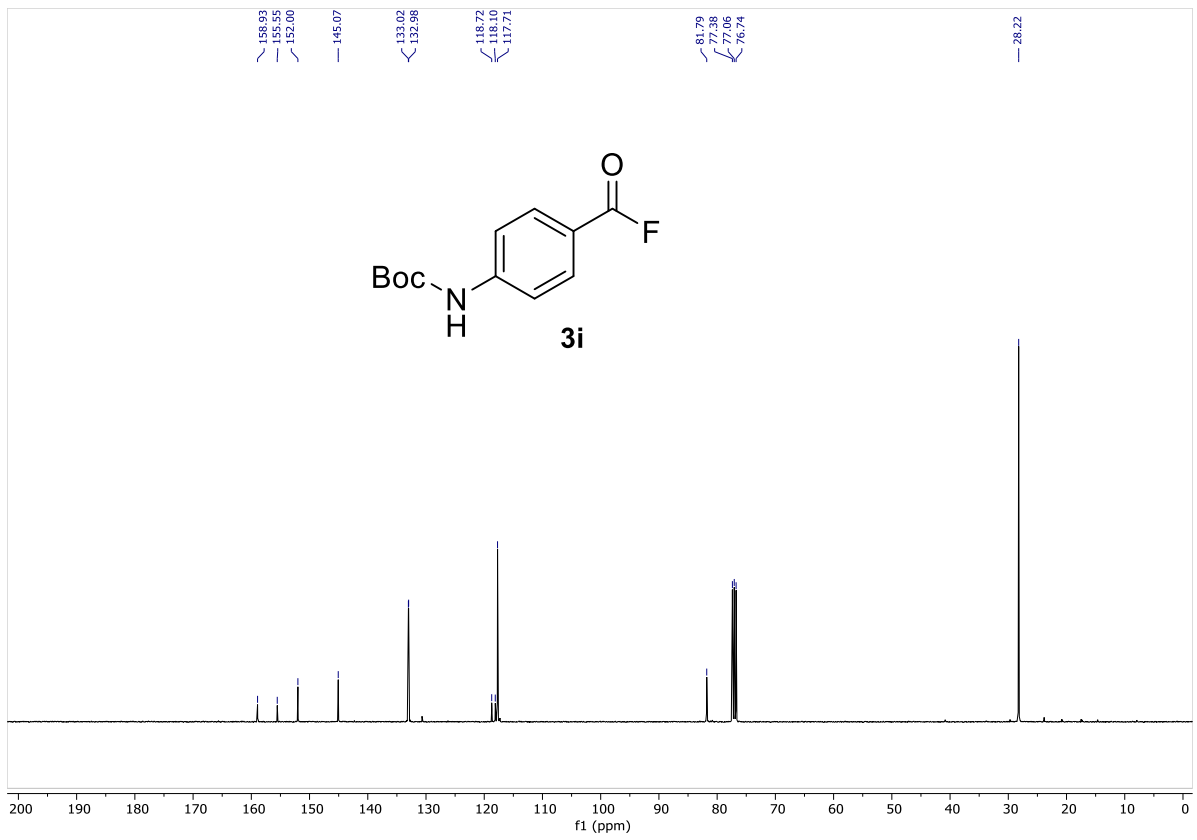

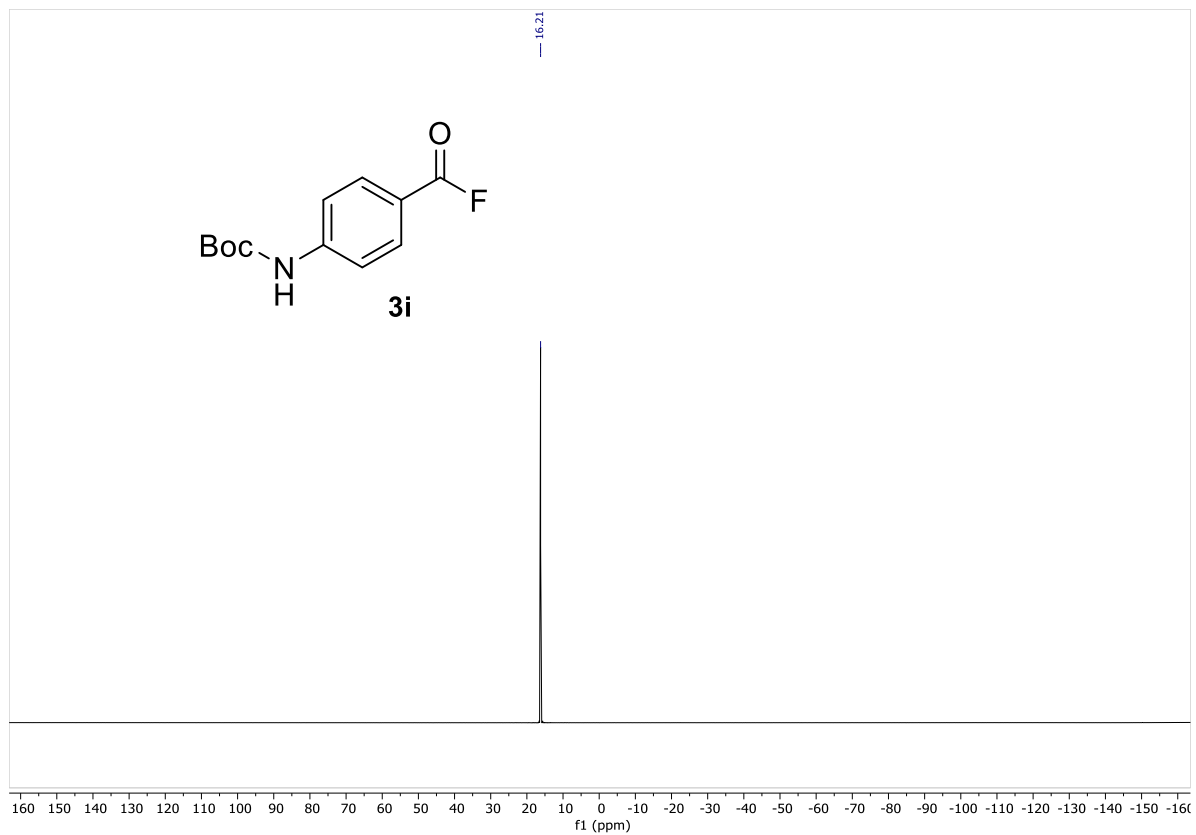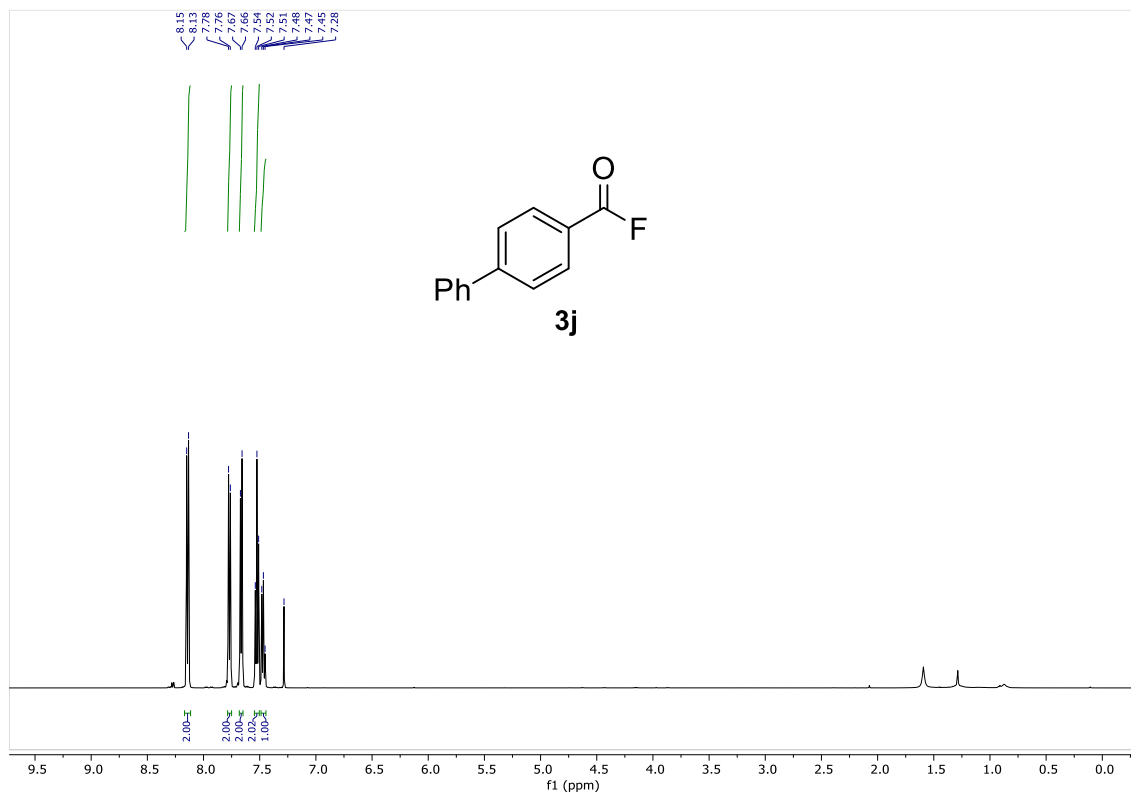

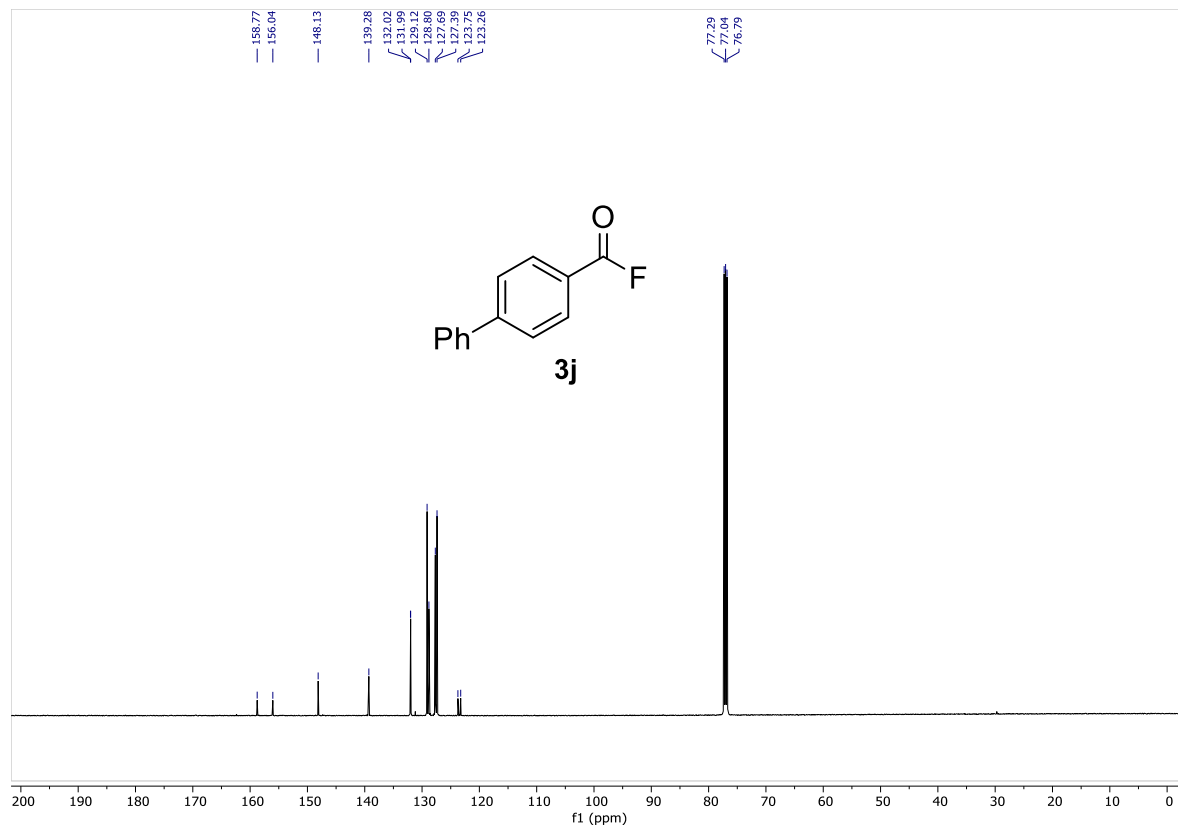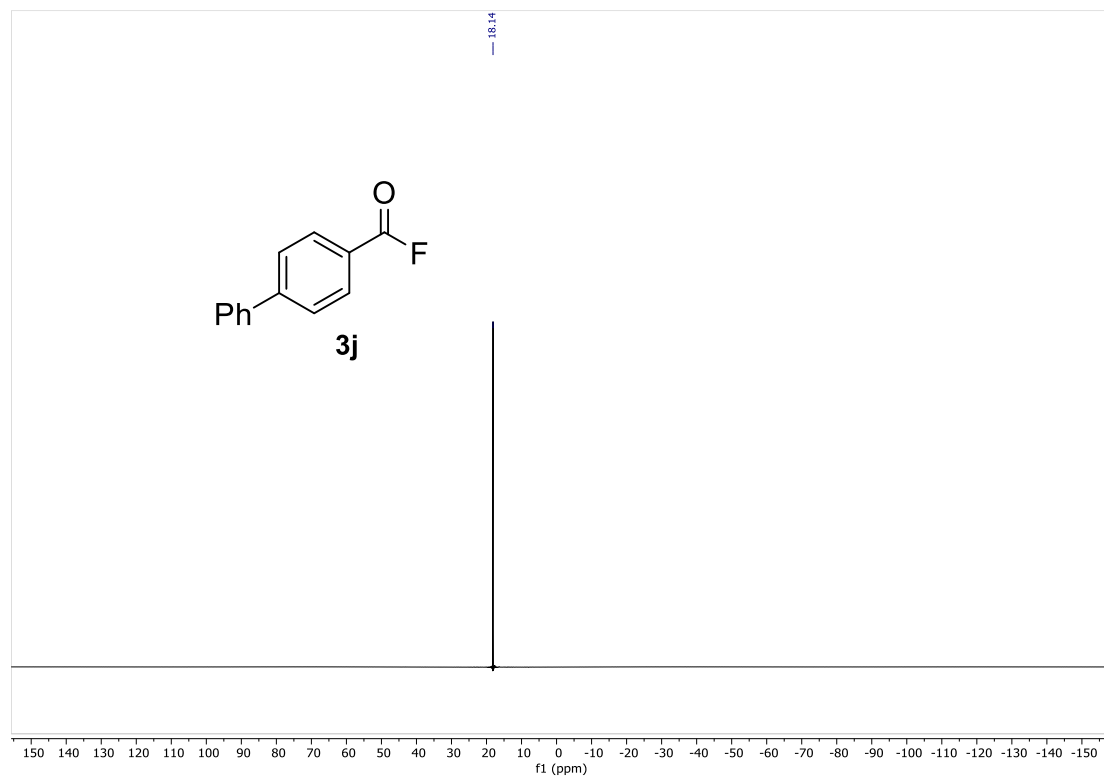

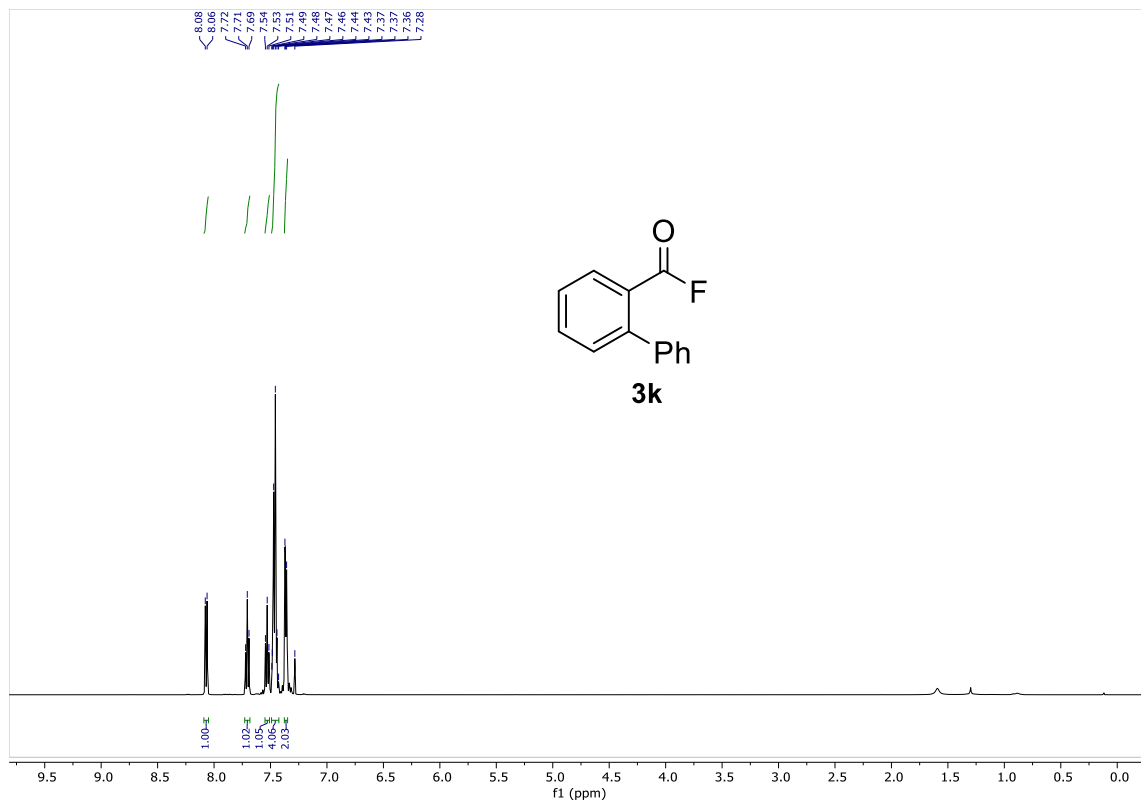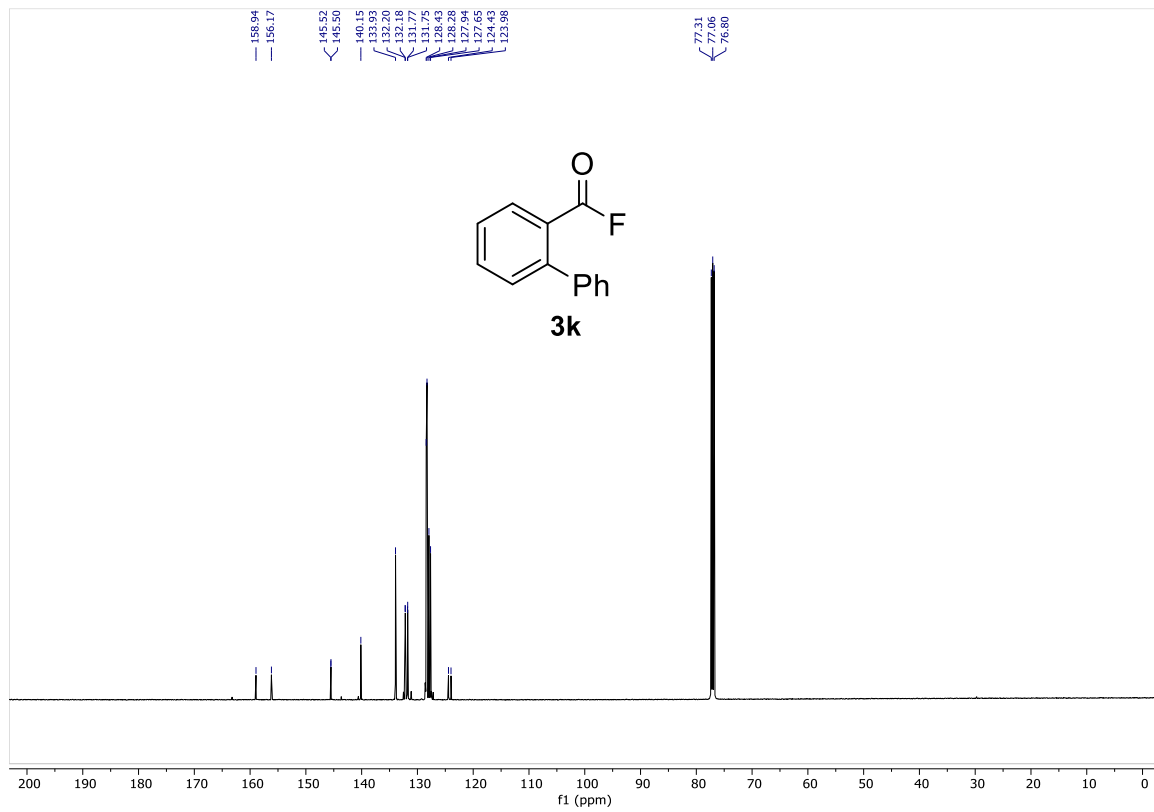

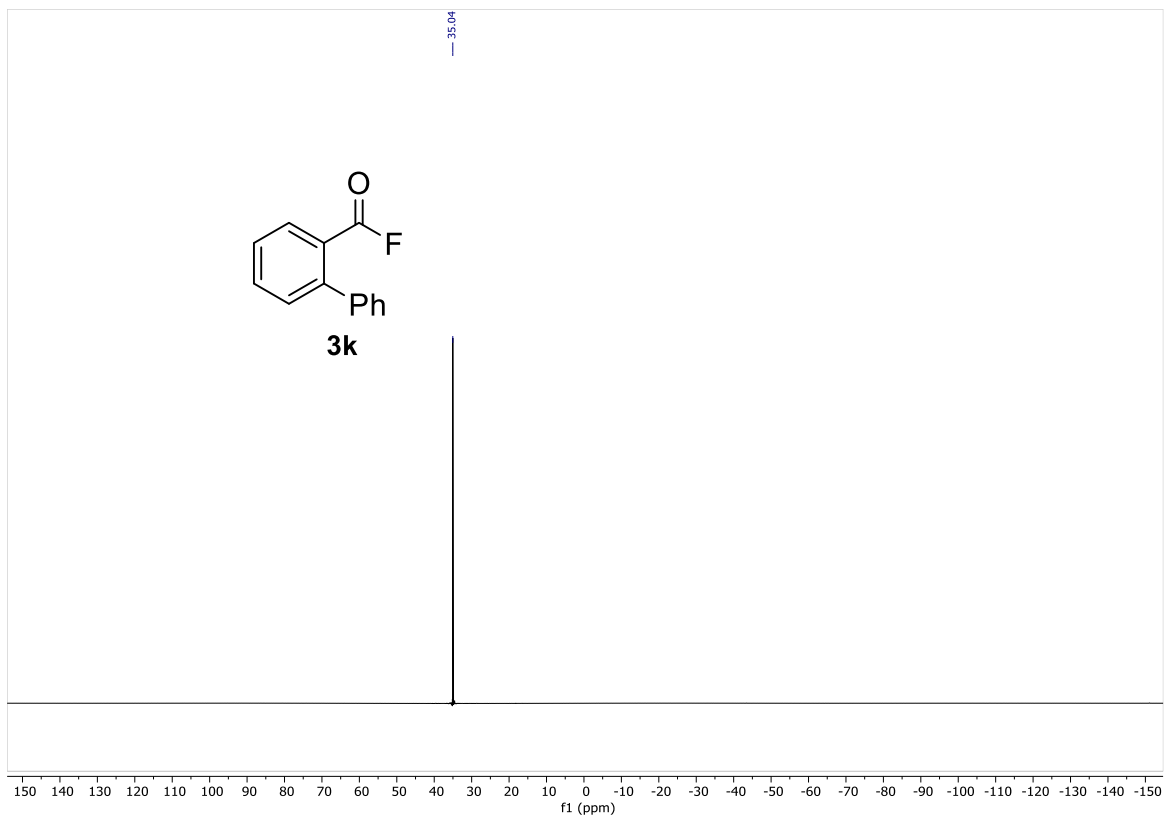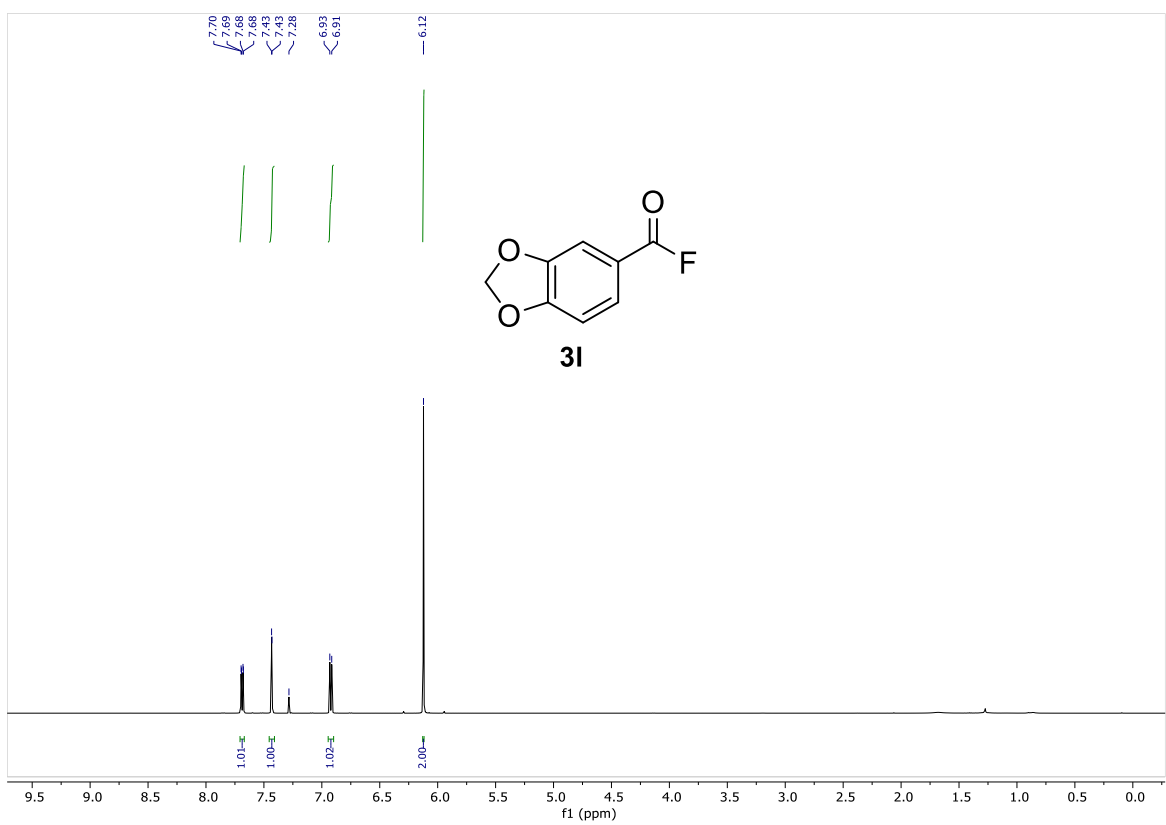

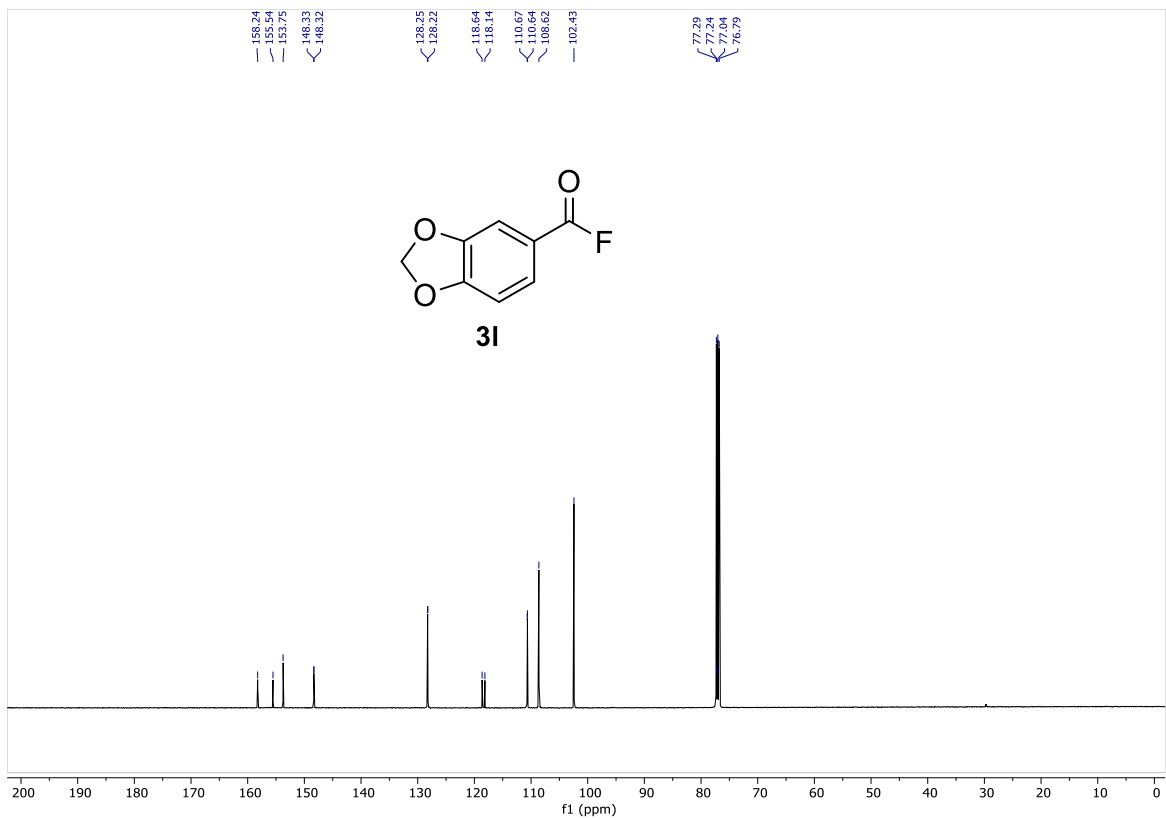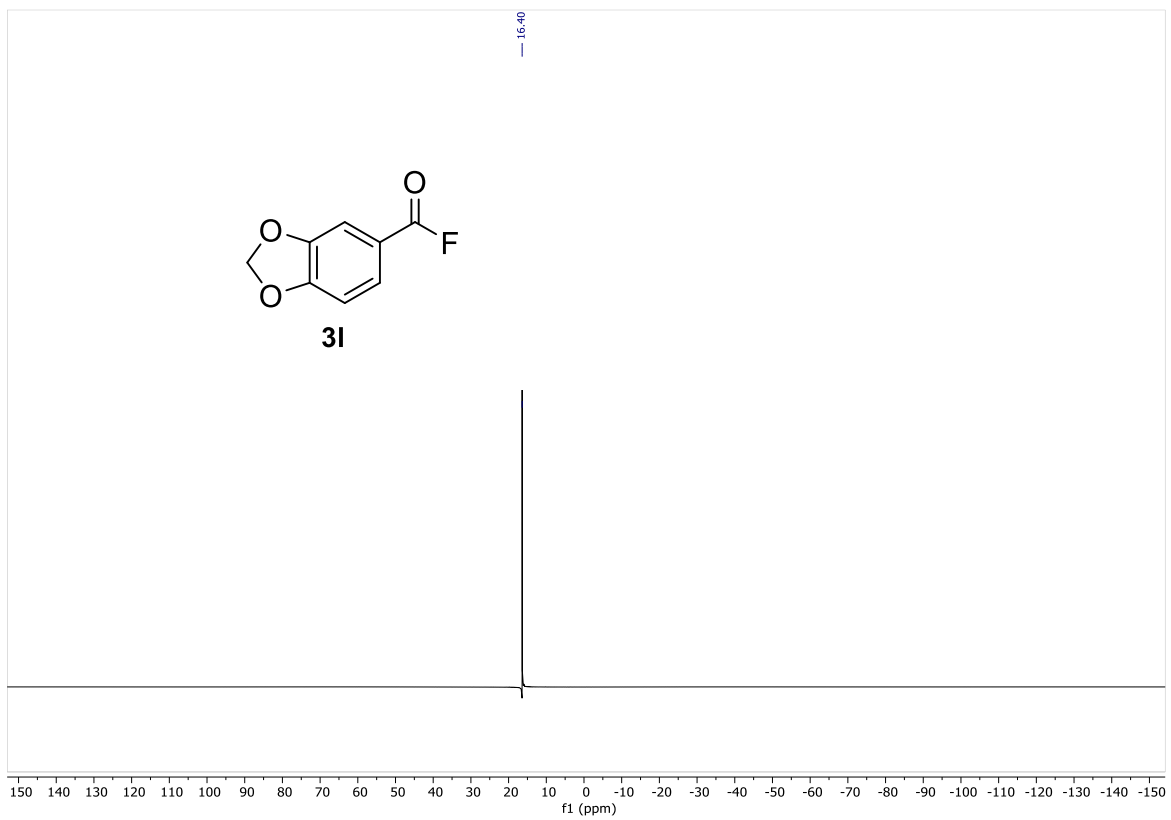

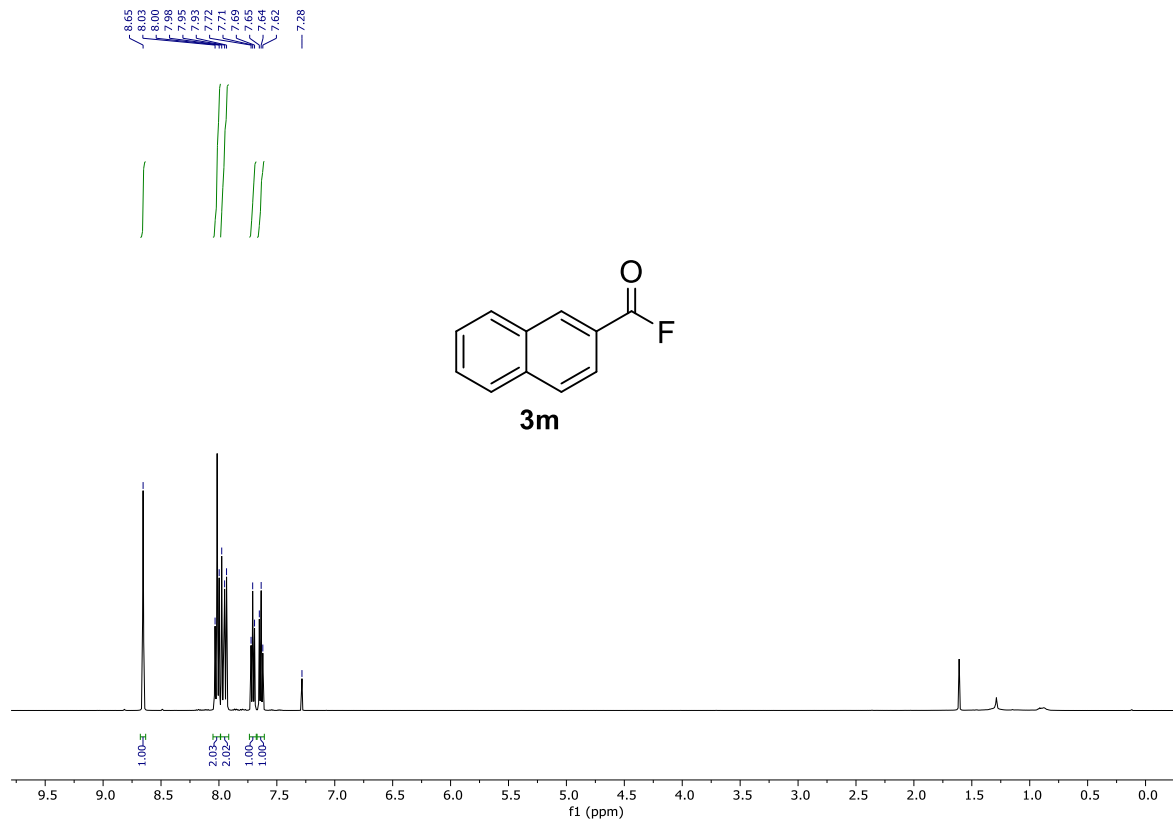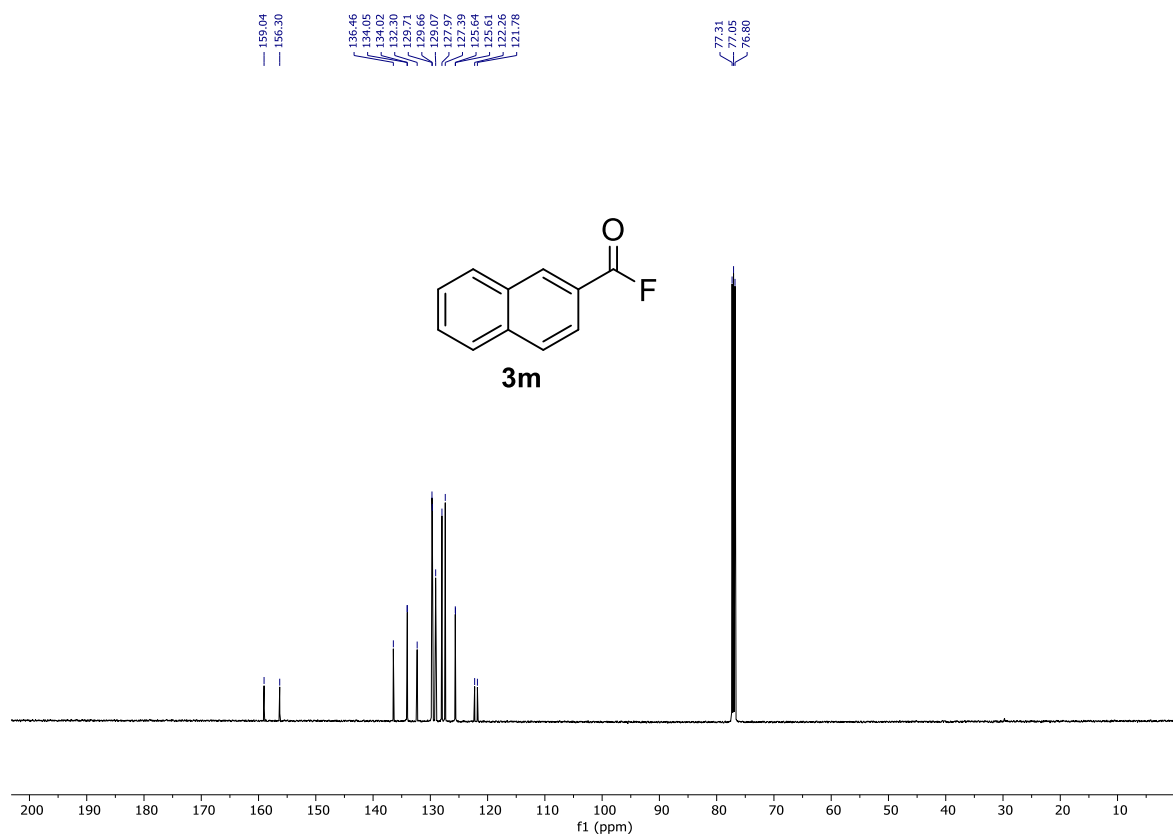

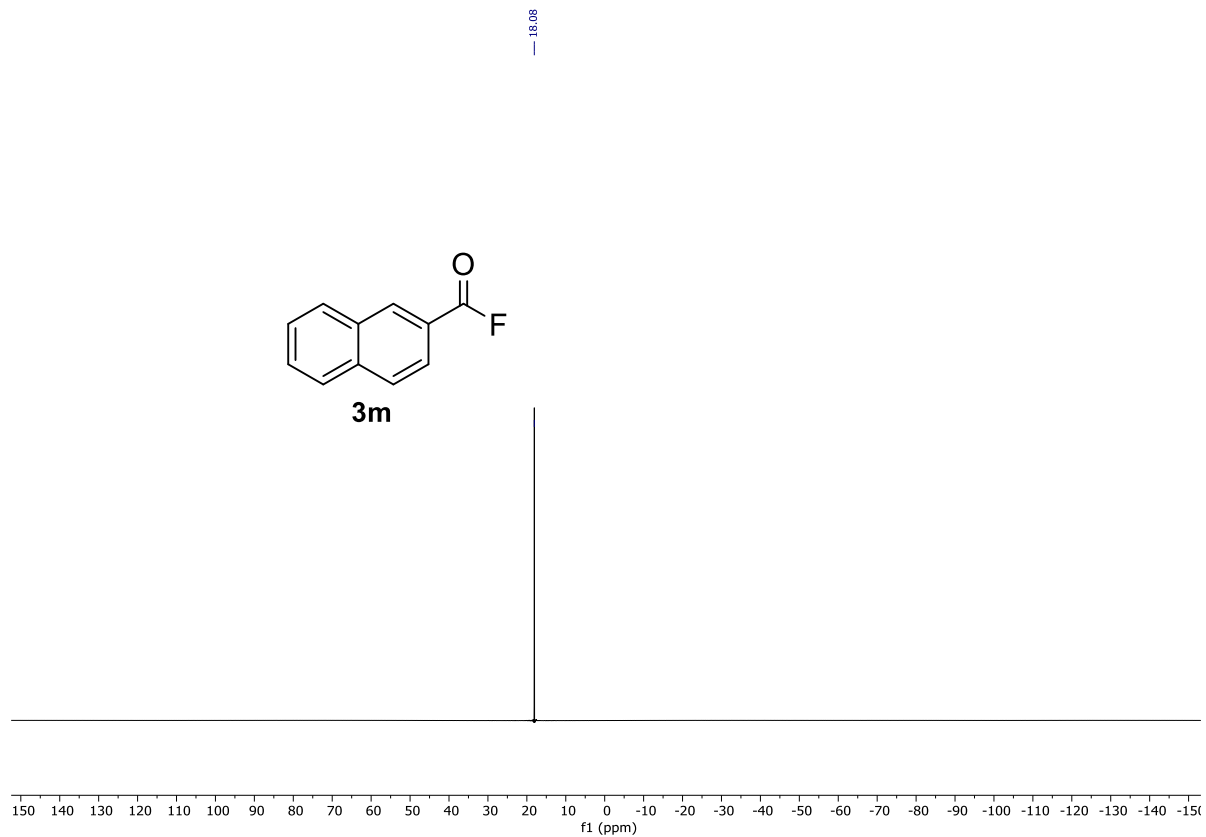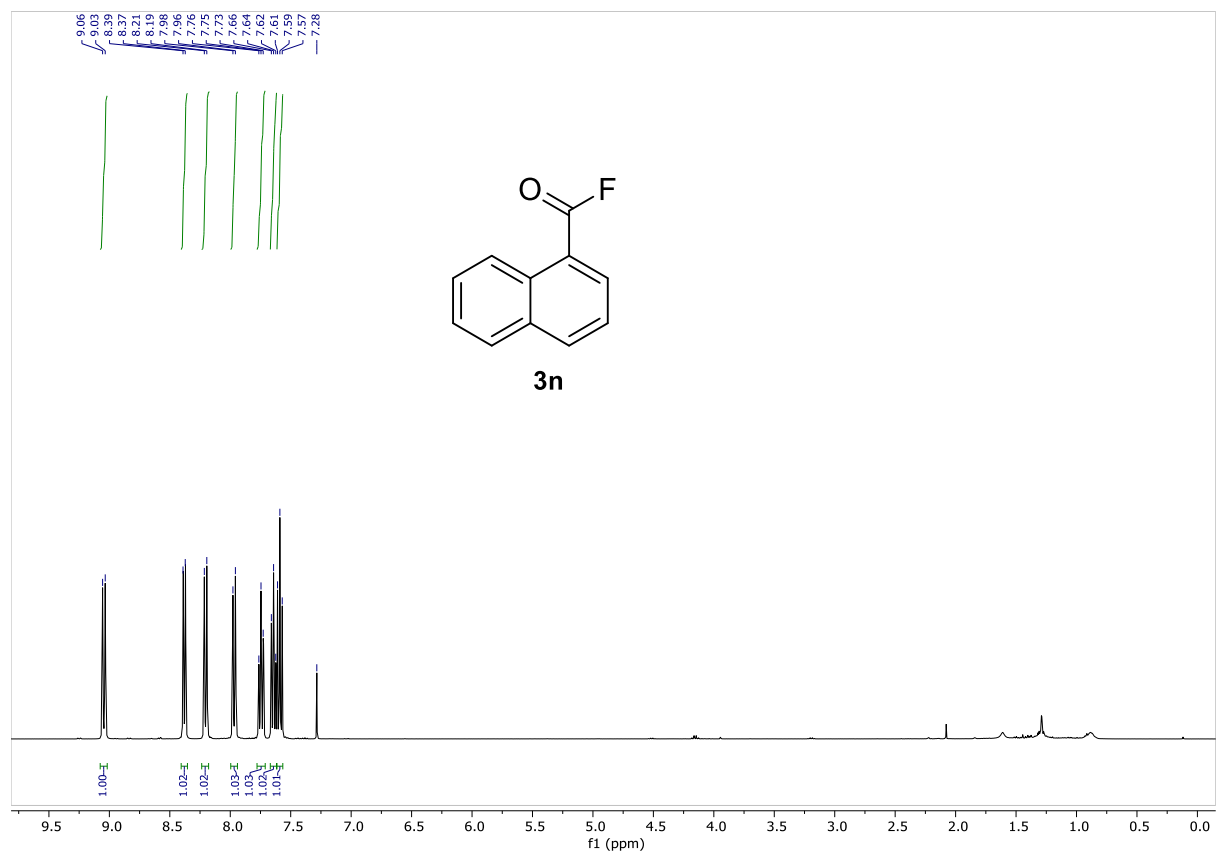



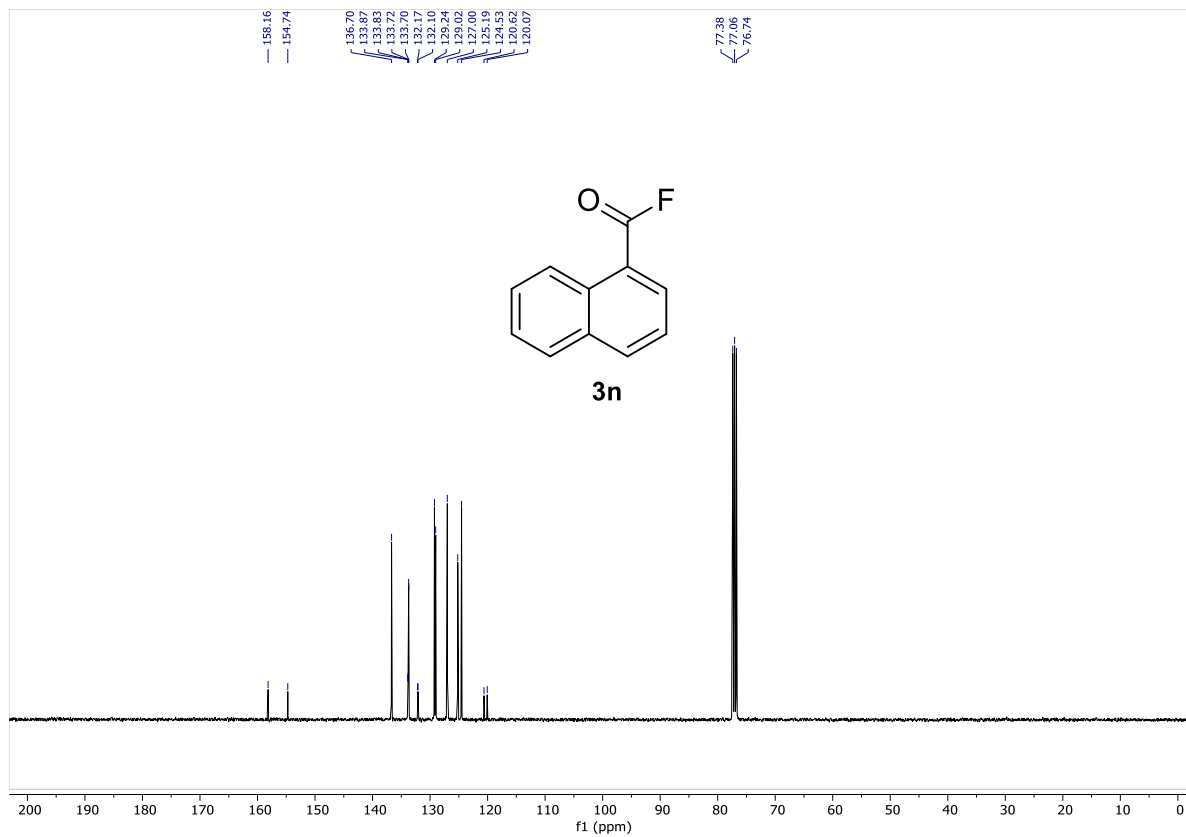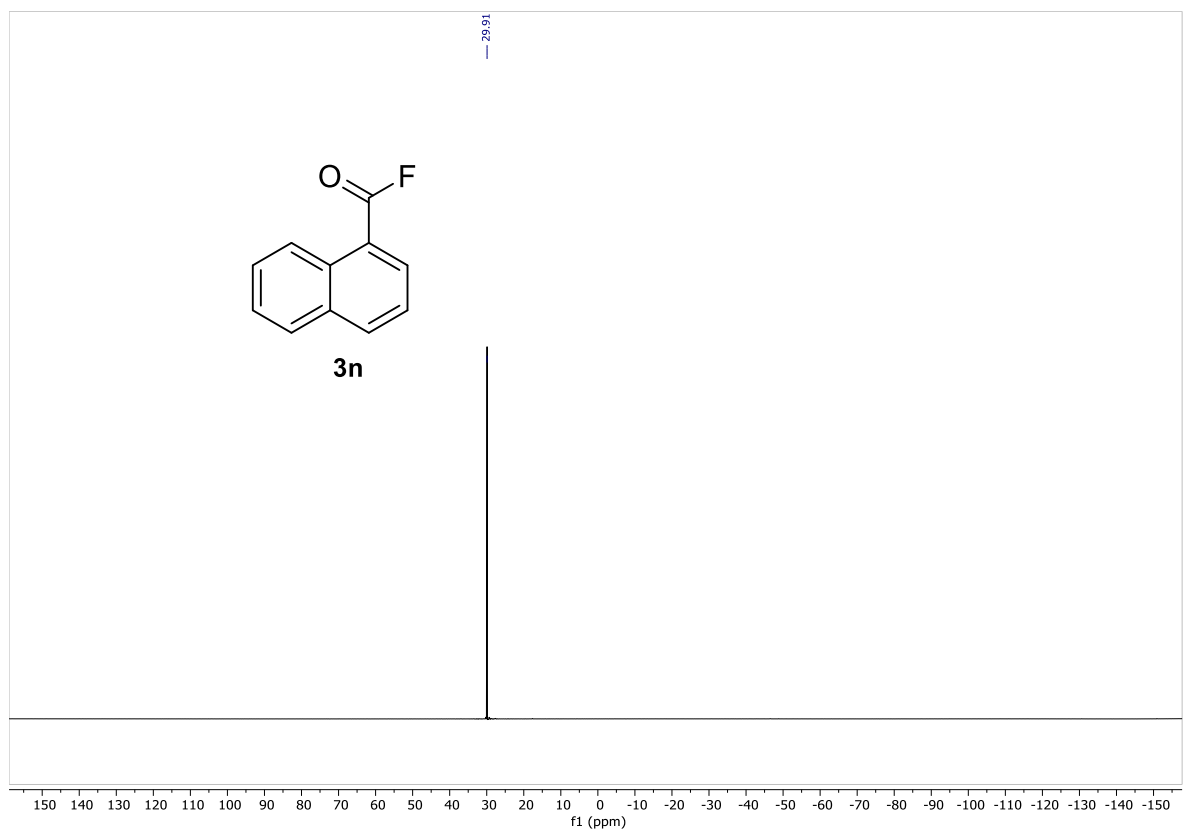

7.89  
7.85  
7.61  
7.60  
7.59  
7.58  
7.53  
7.51  
7.50  
7.49  
7.48  
7.45  
7.44  
7.28  
6.43  
6.41  
6.37

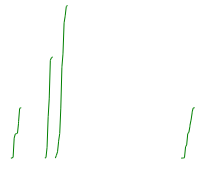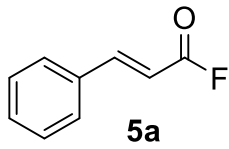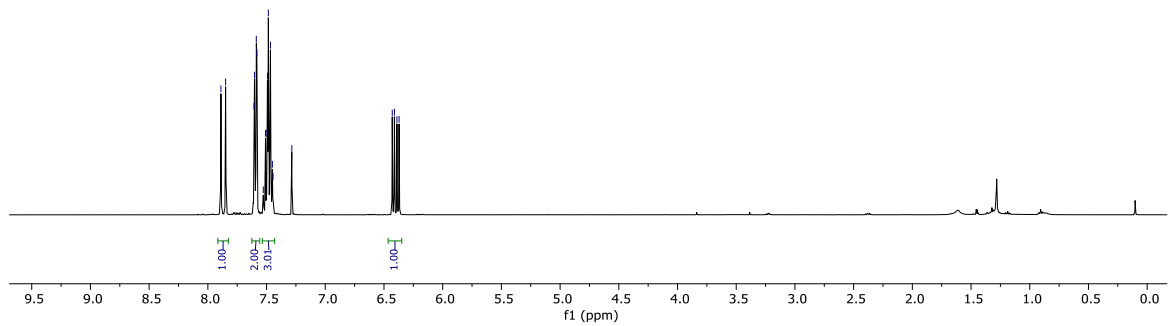

158.82  
155.45  
154.77  
151.41  
133.14  
131.88  
129.21  
128.75  
112.44  
111.78  
77.37  
77.05  
76.73

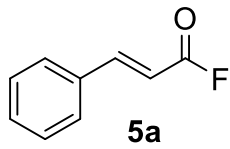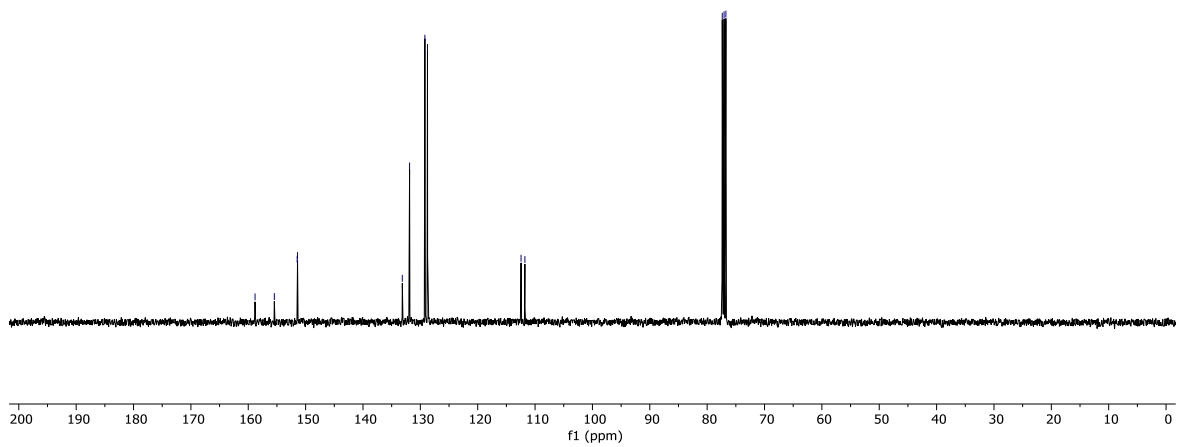

— 25.61

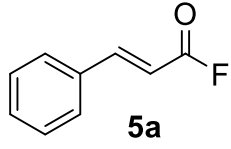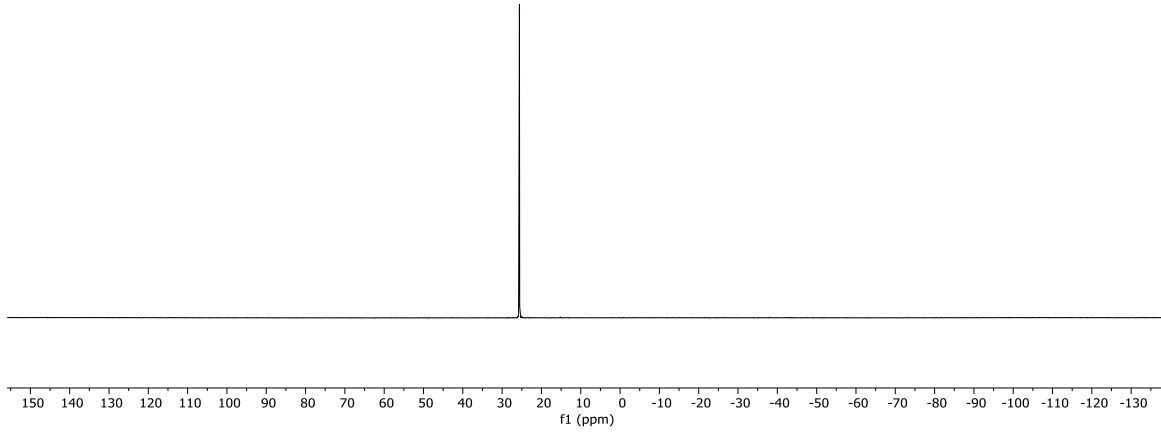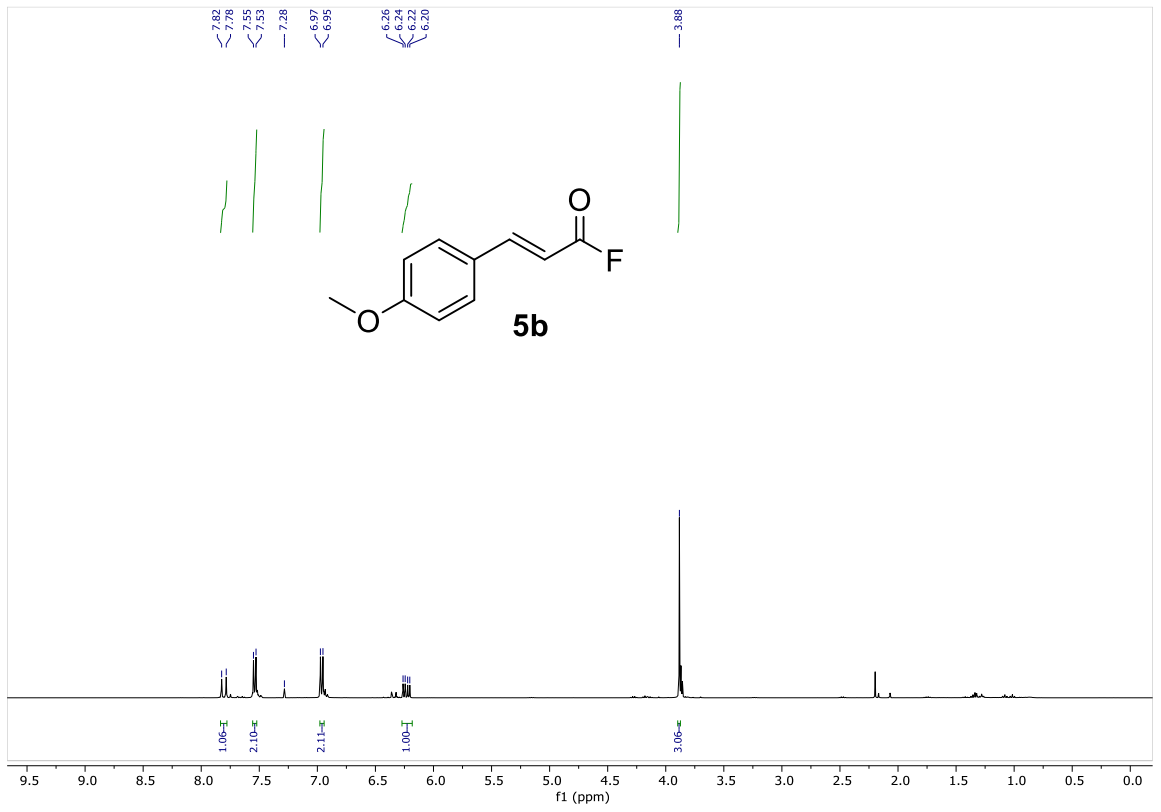

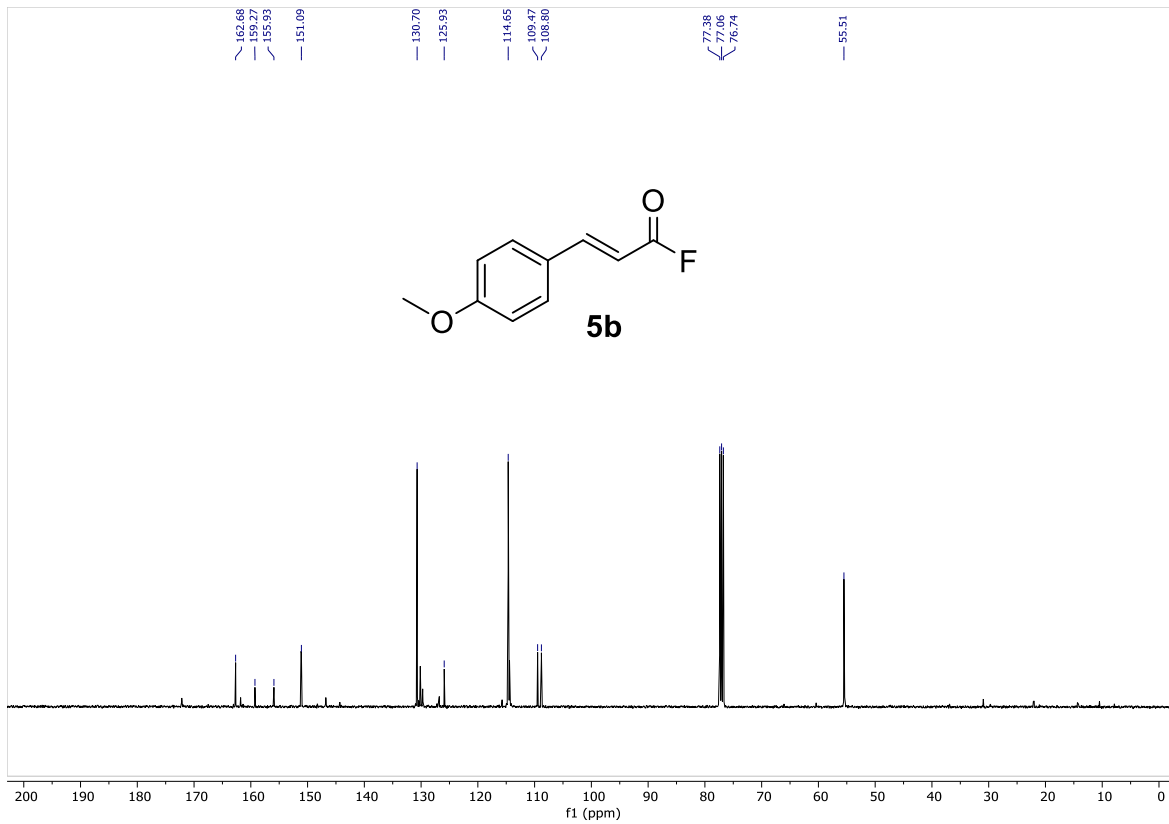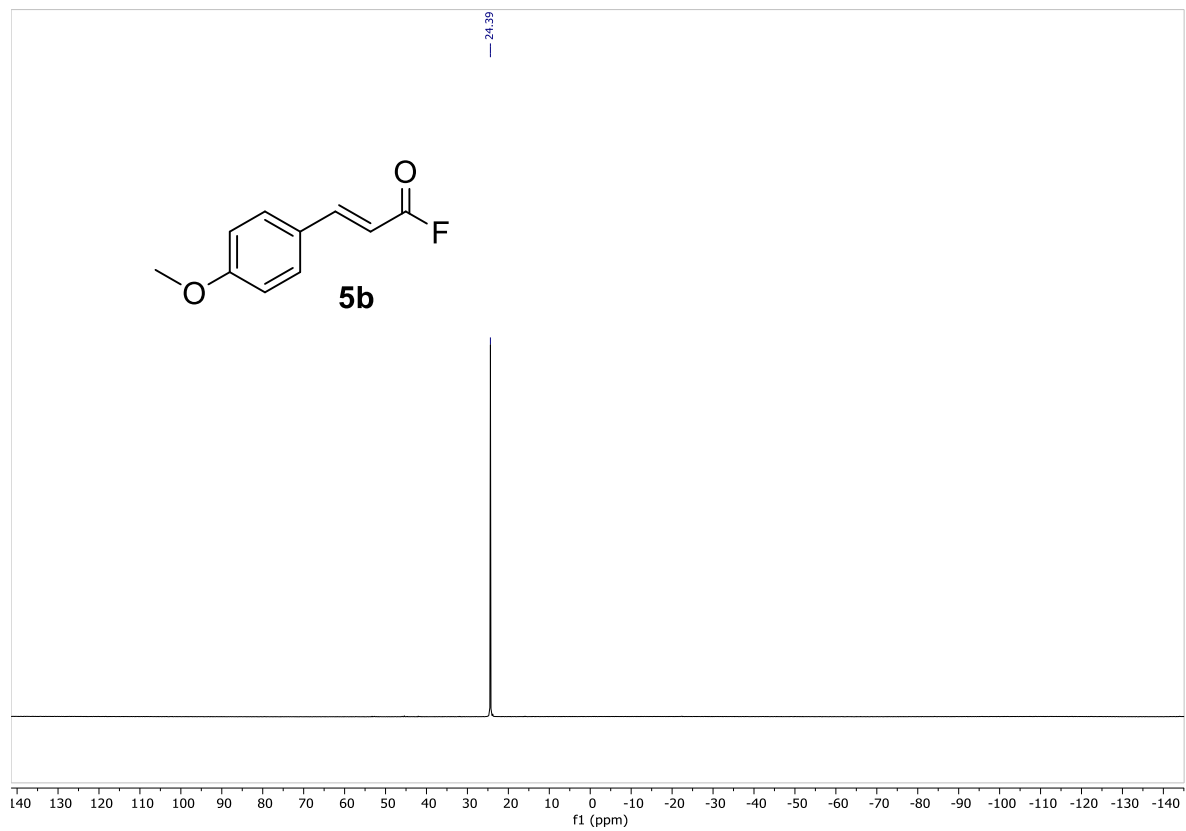

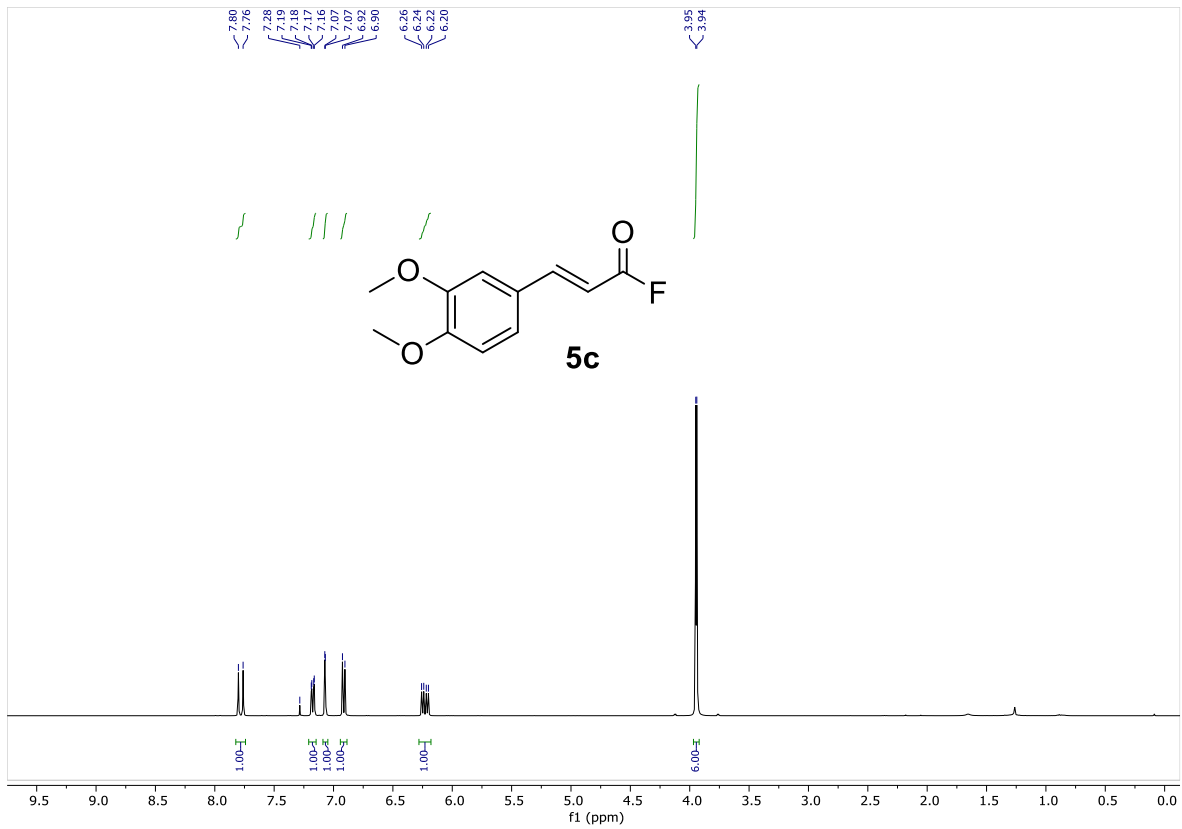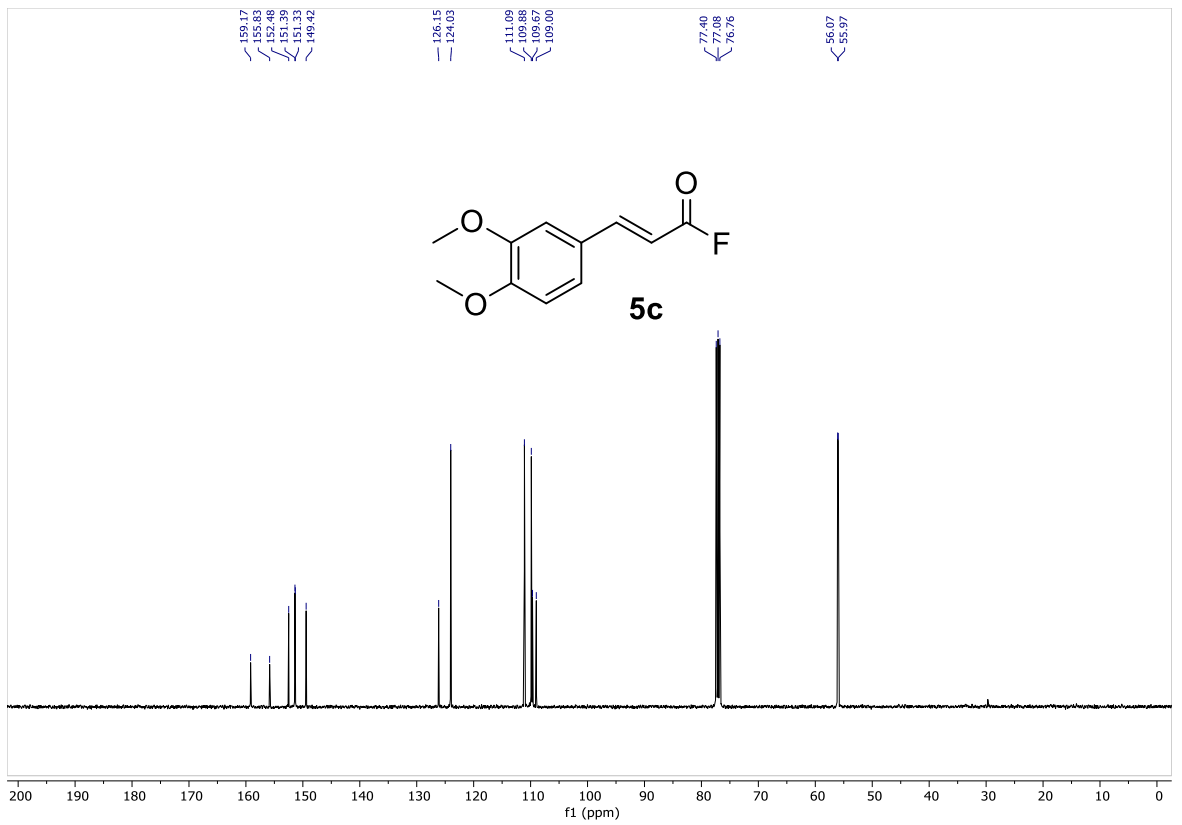

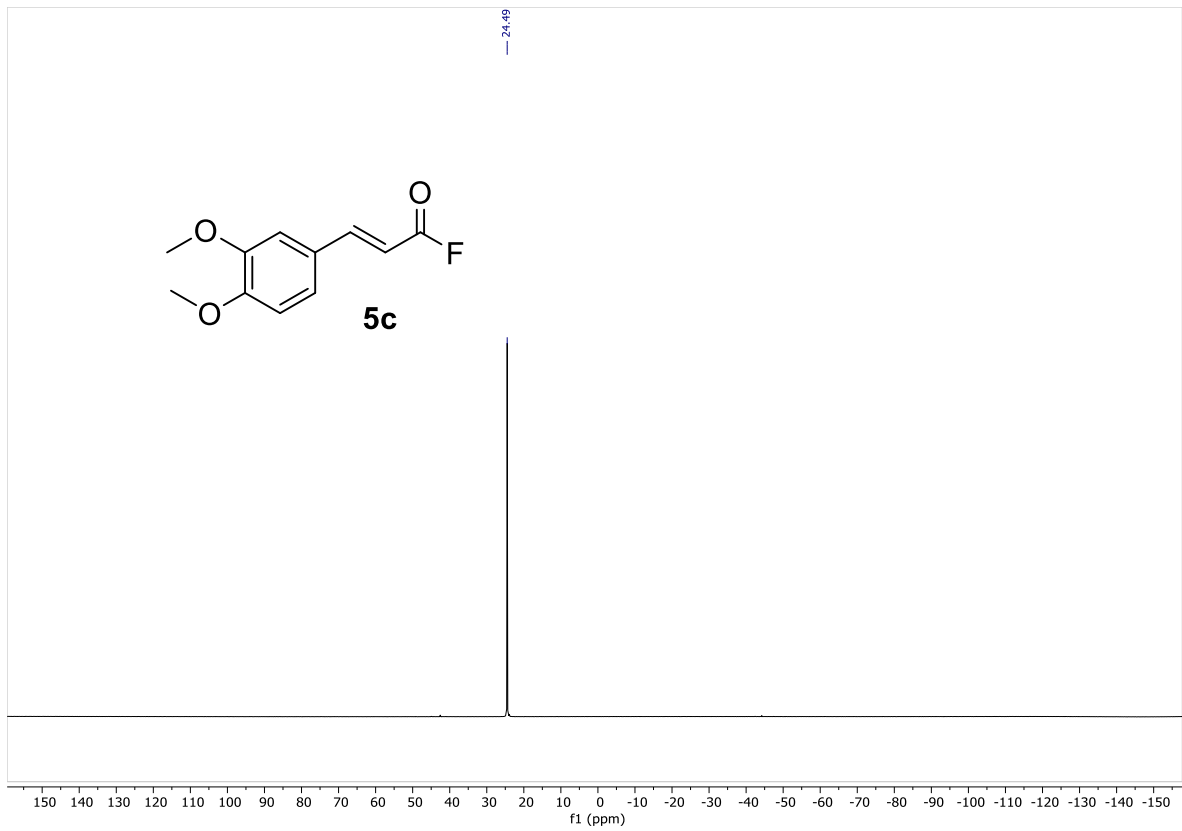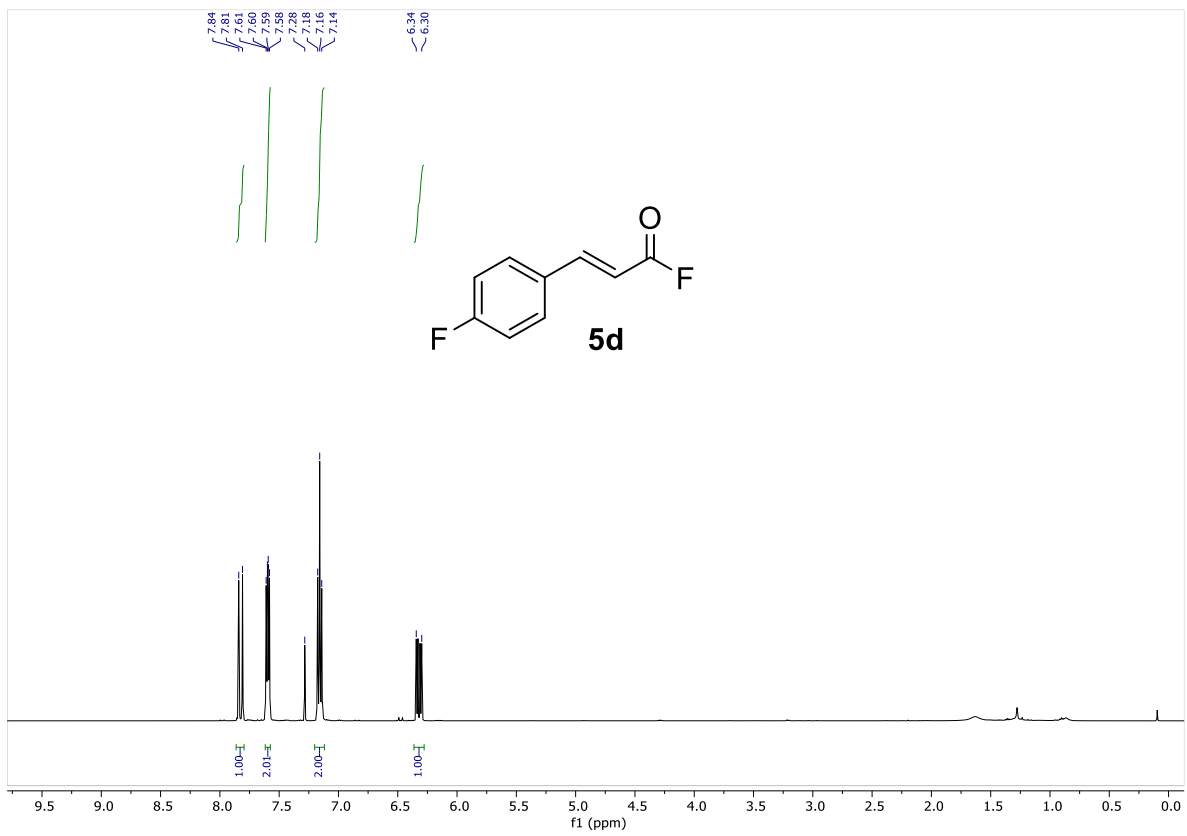

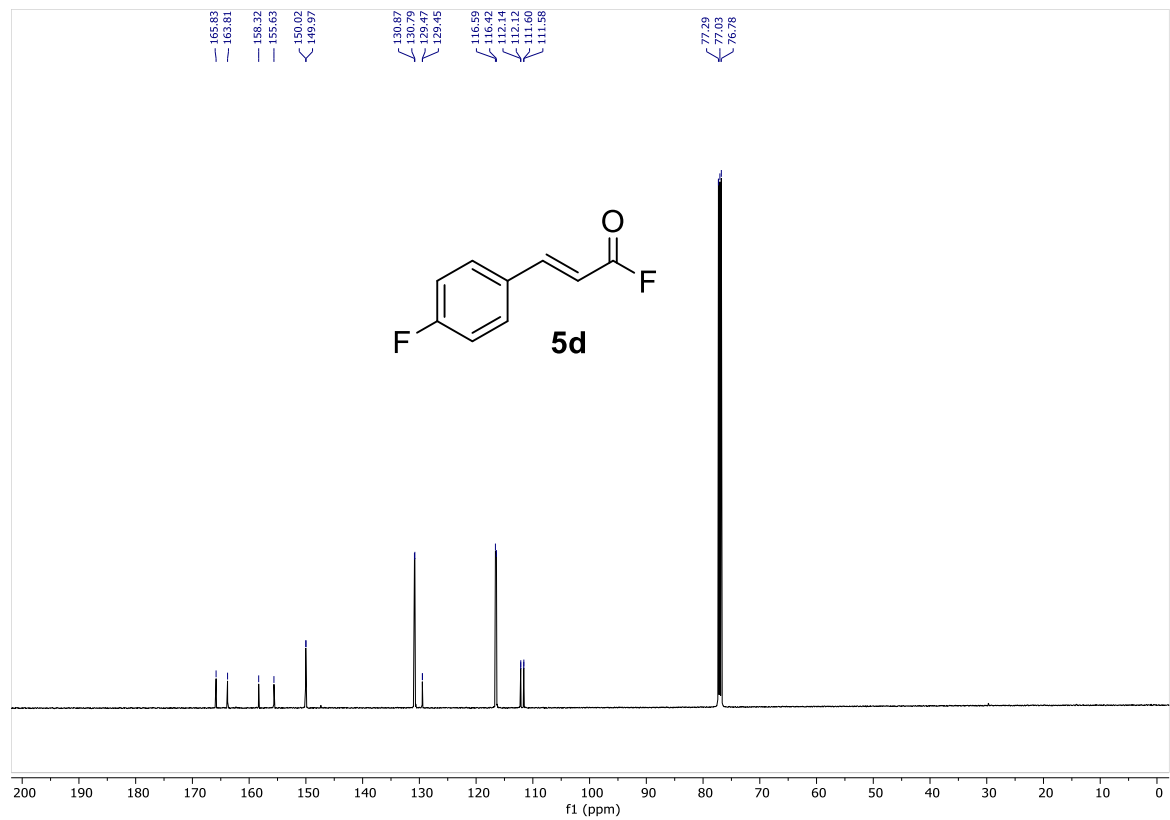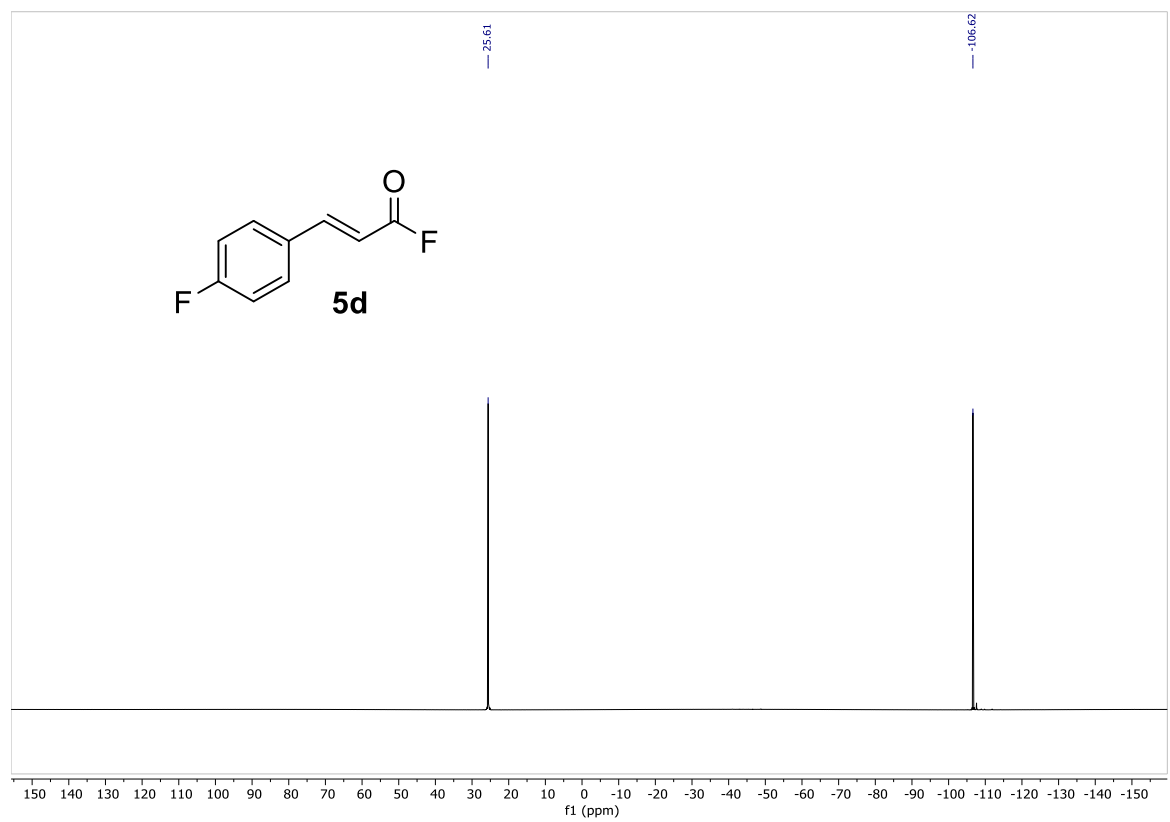

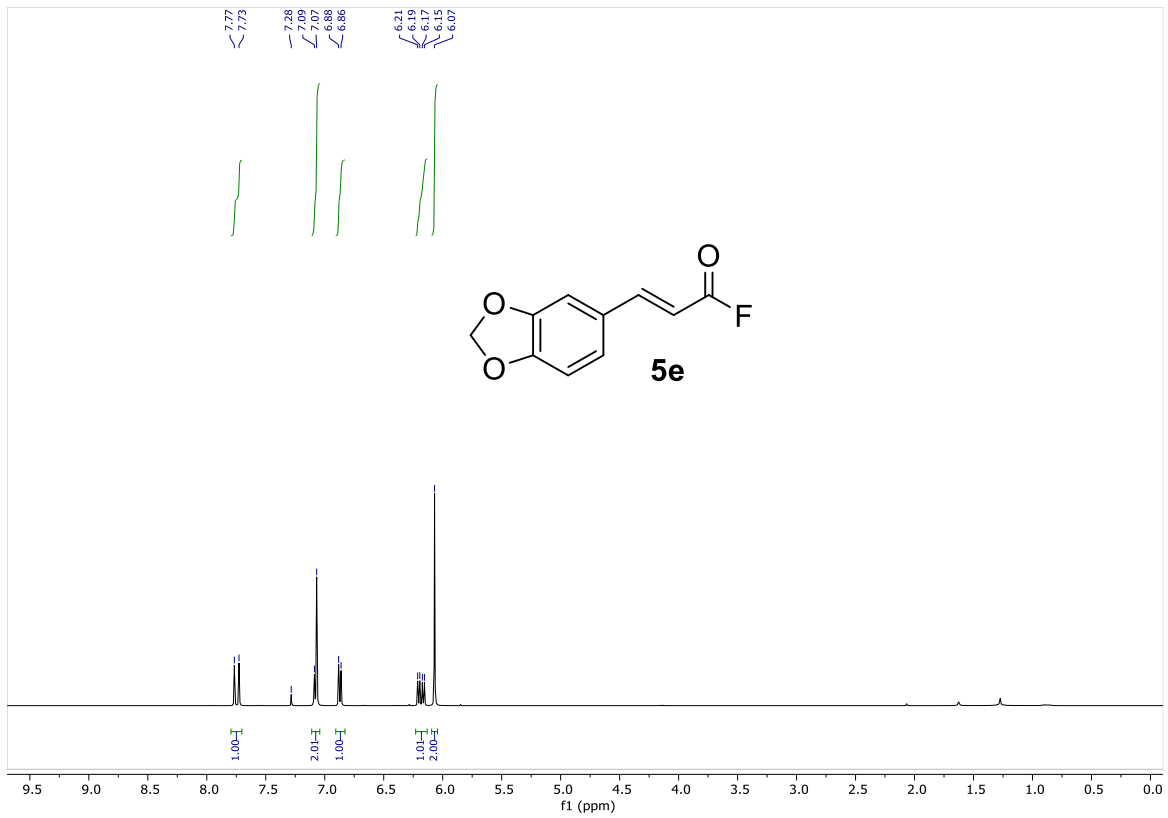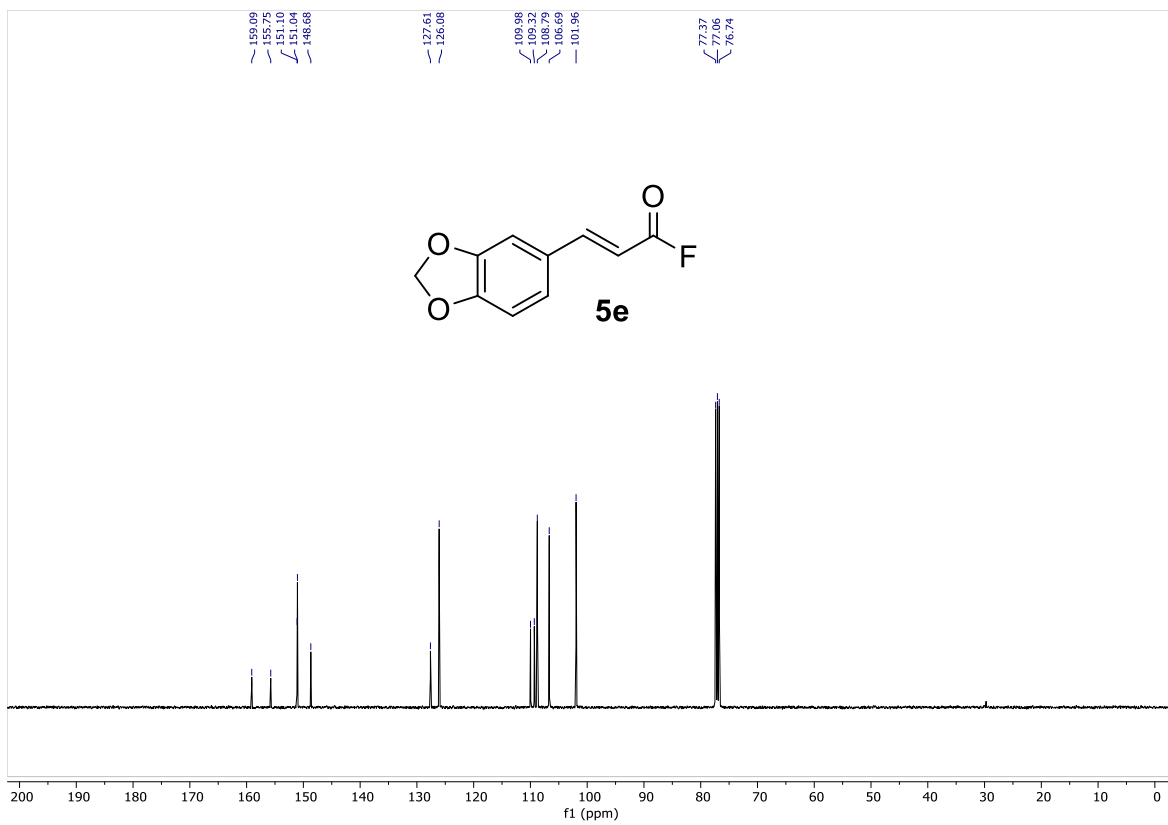



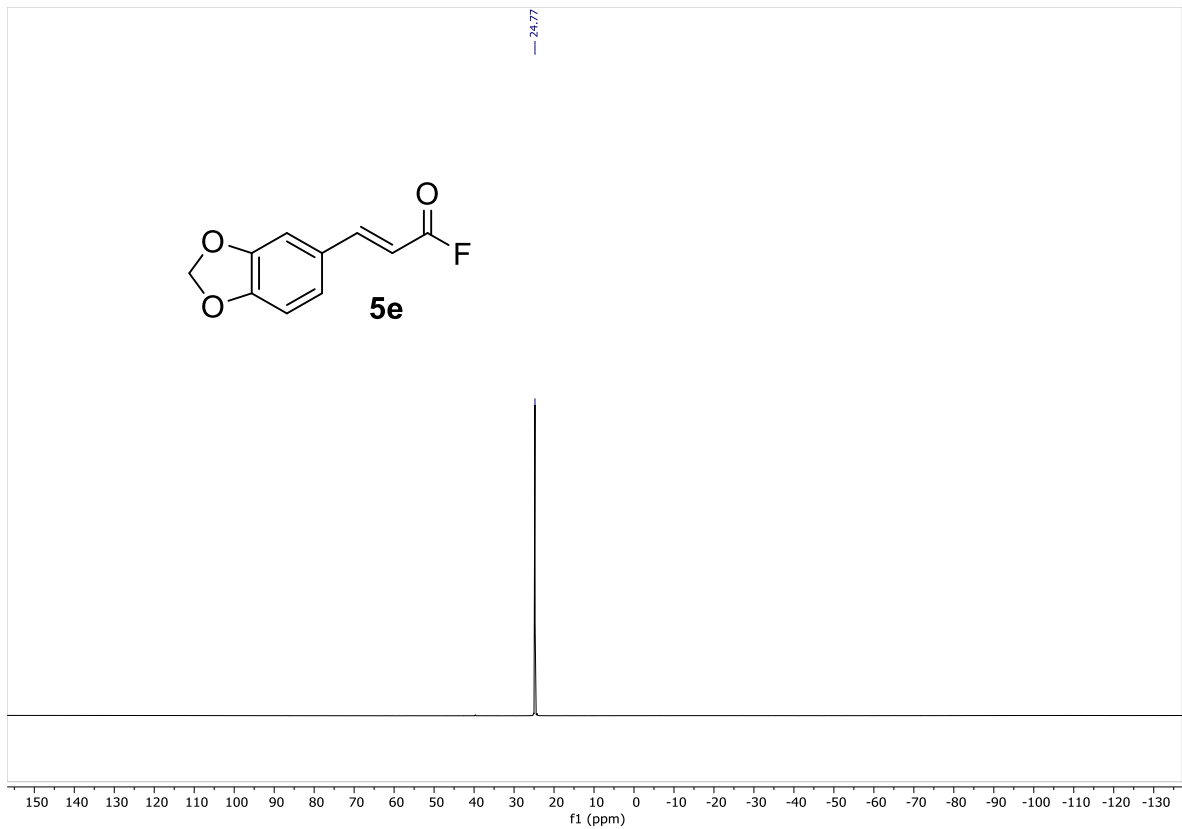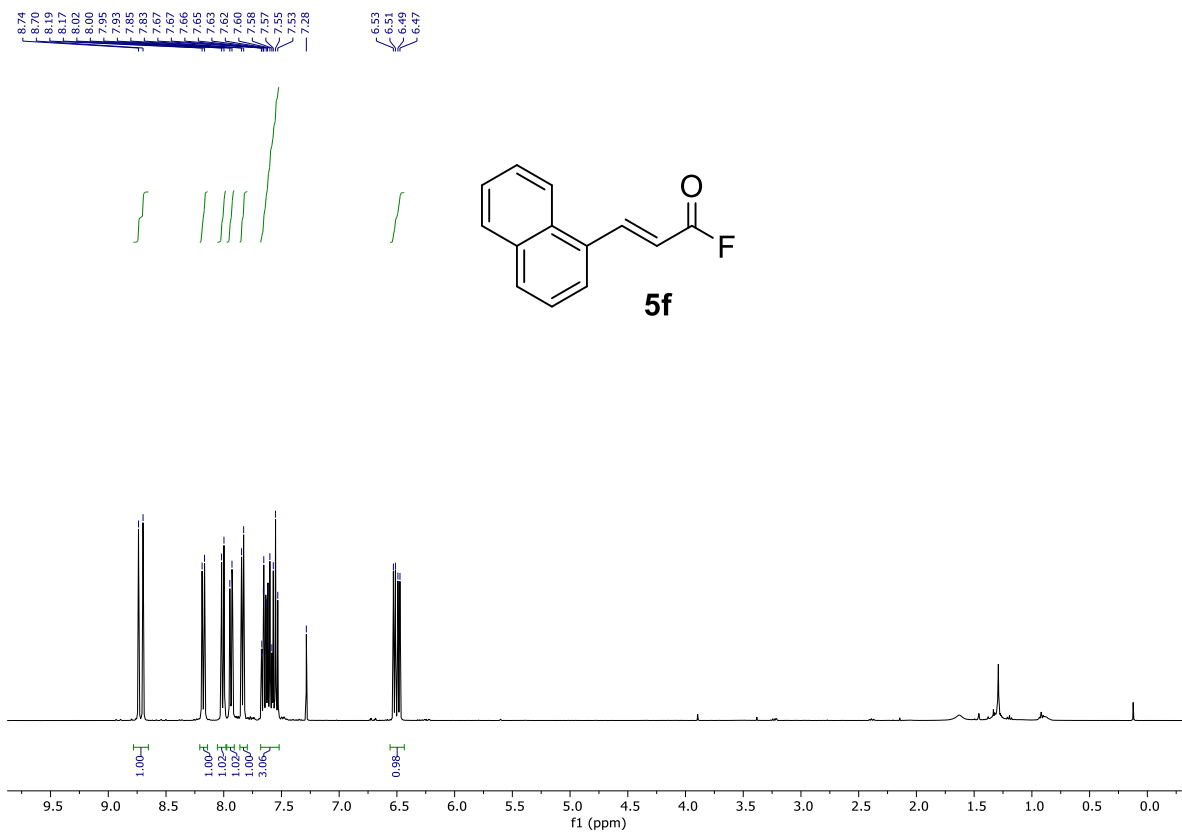

158.72  
155.35  
148.30  
148.24  
133.73  
132.23  
131.33  
129.85  
129.00  
127.55  
126.62  
125.92  
125.44  
124.66  
114.00  
77.39  
77.07  
76.75

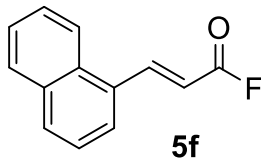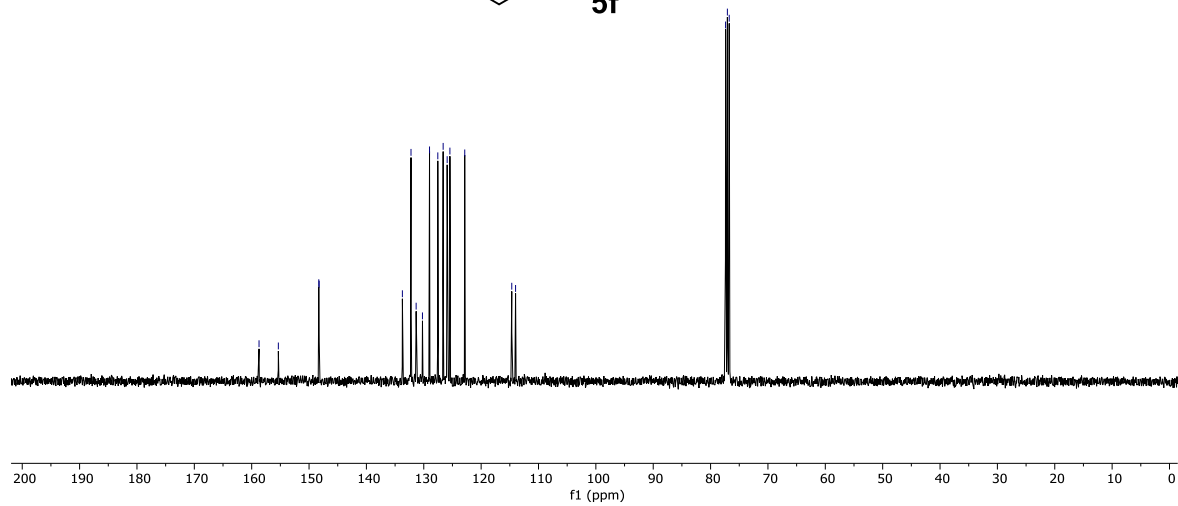

25.96

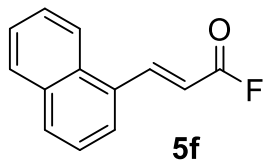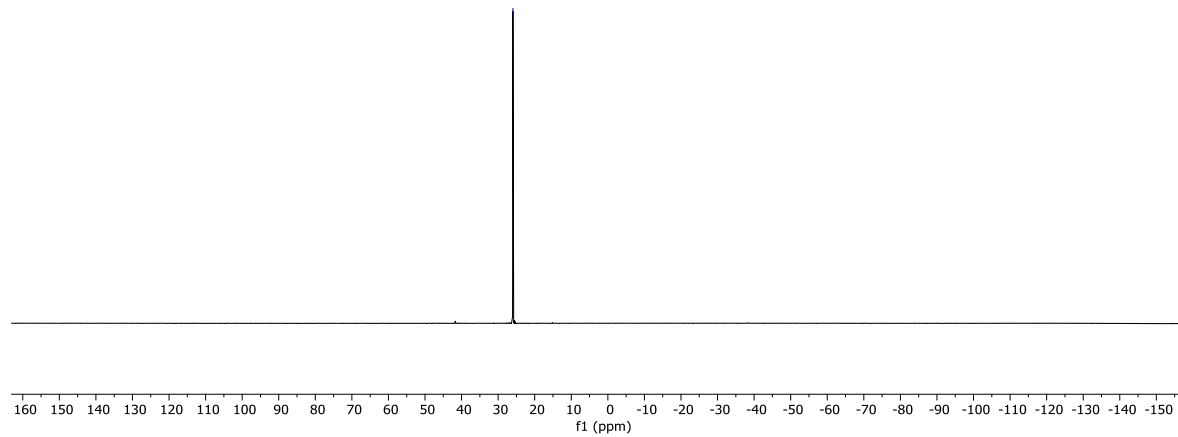

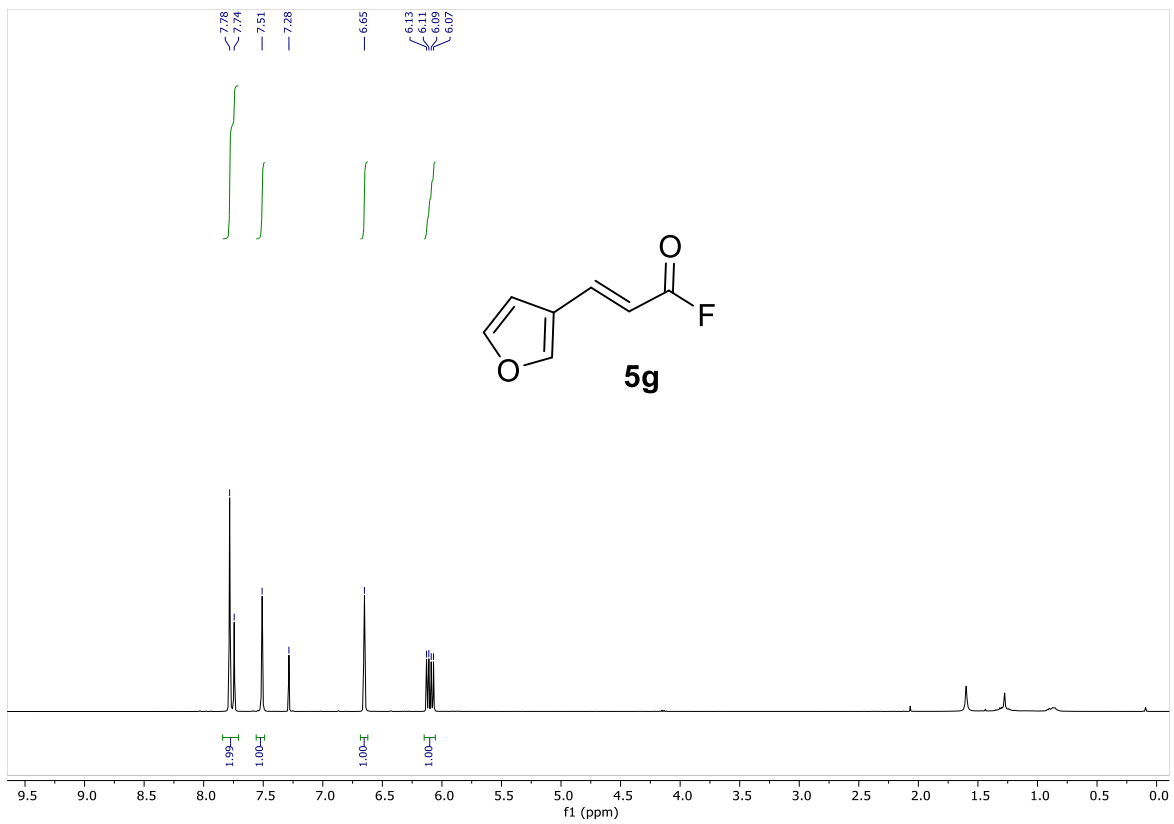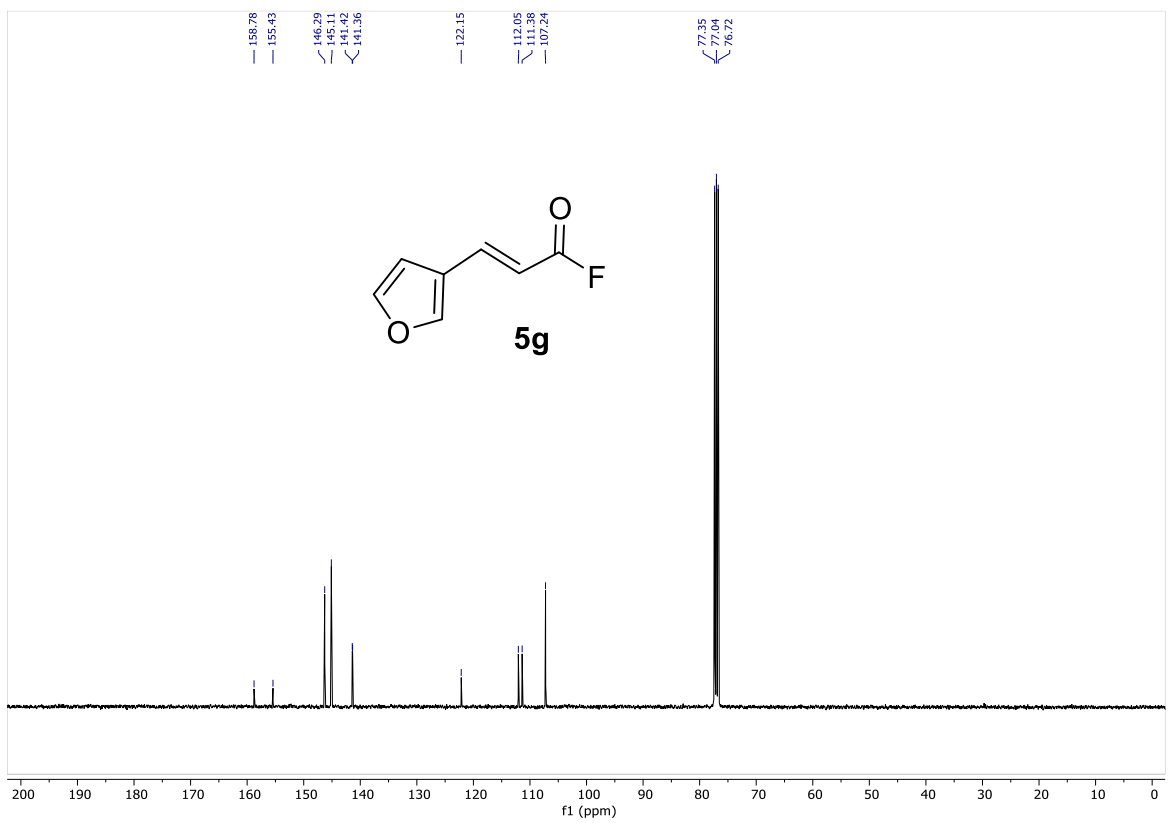

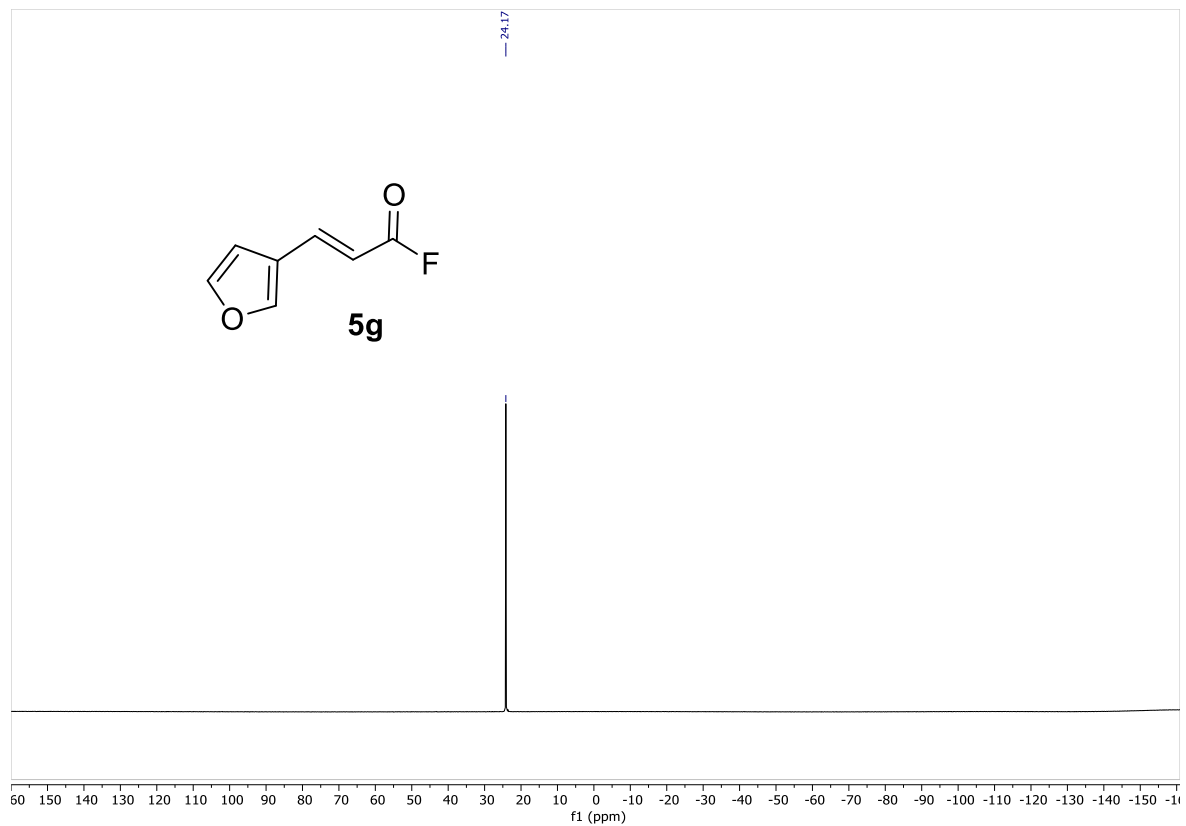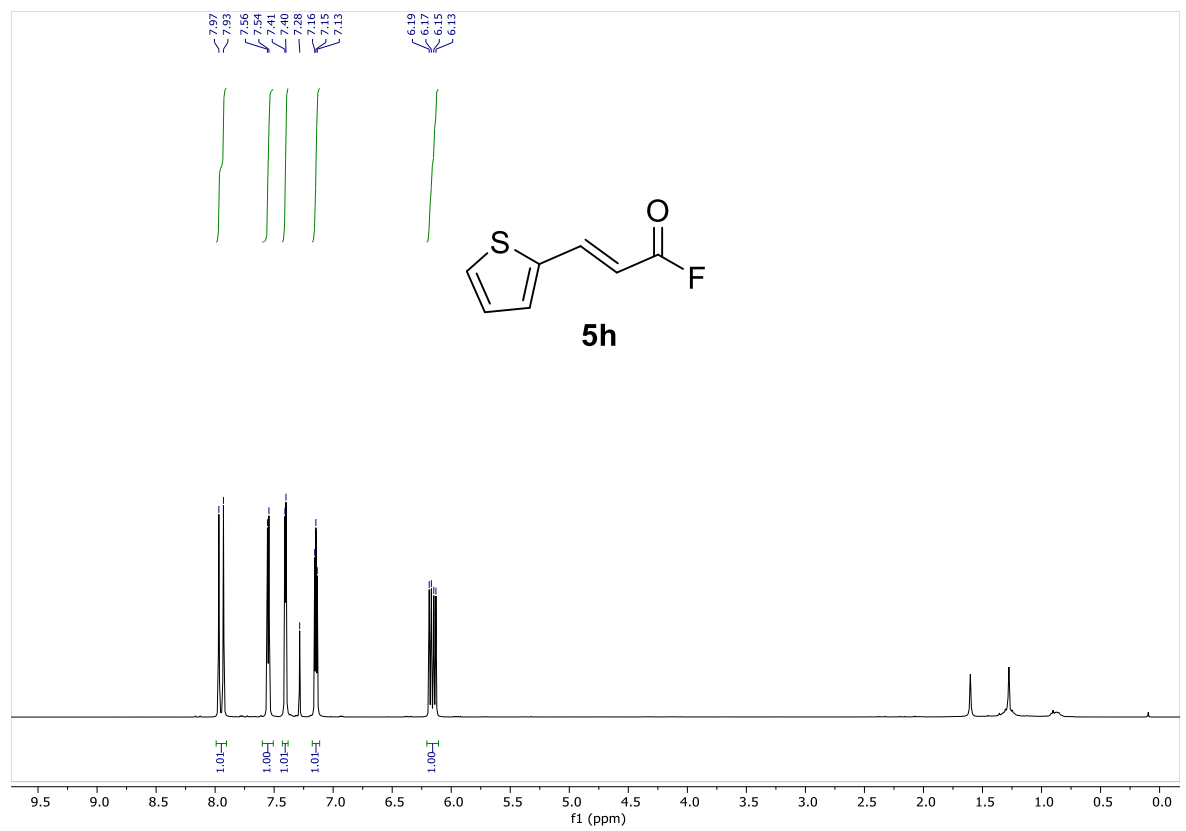

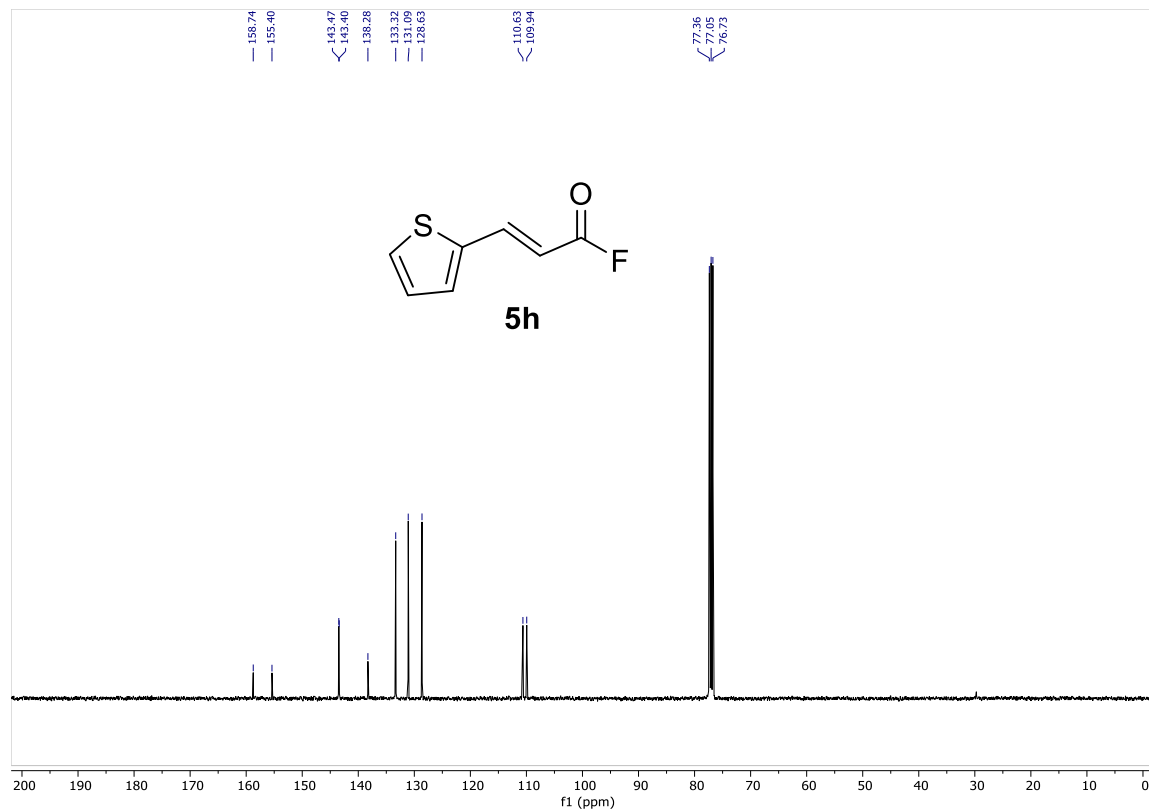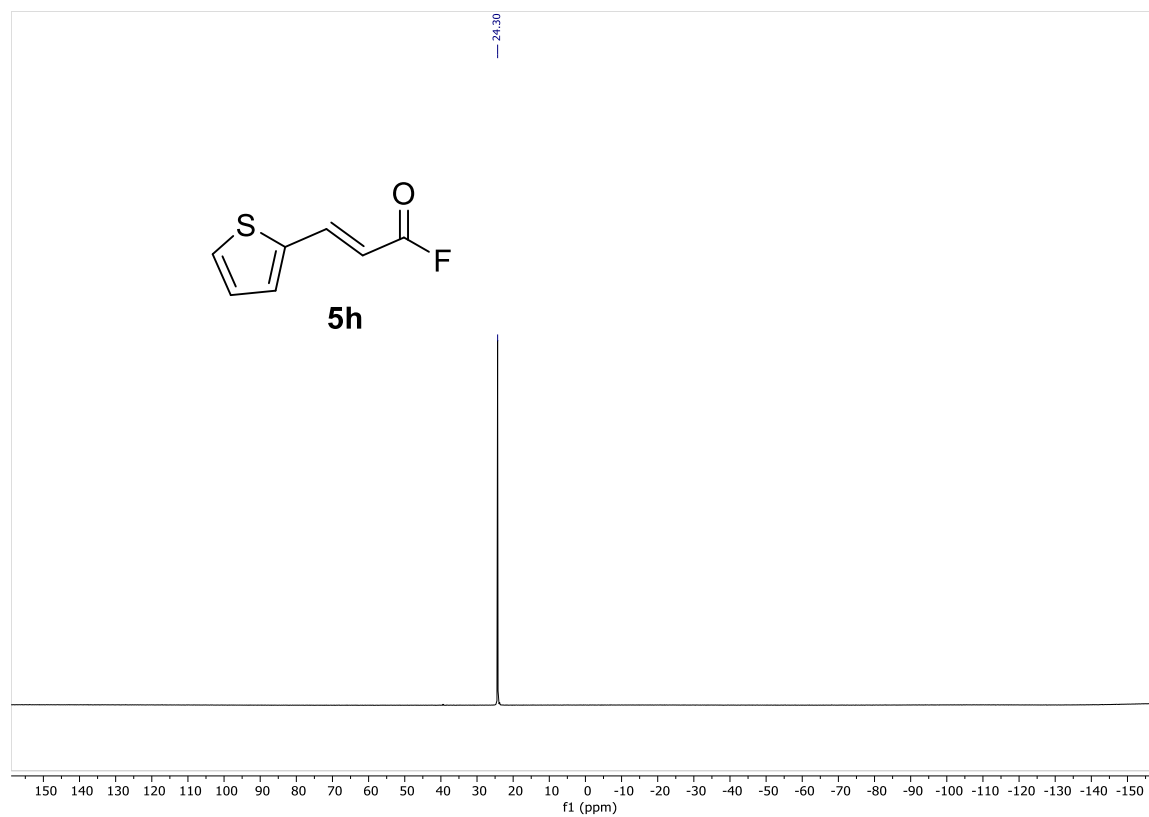

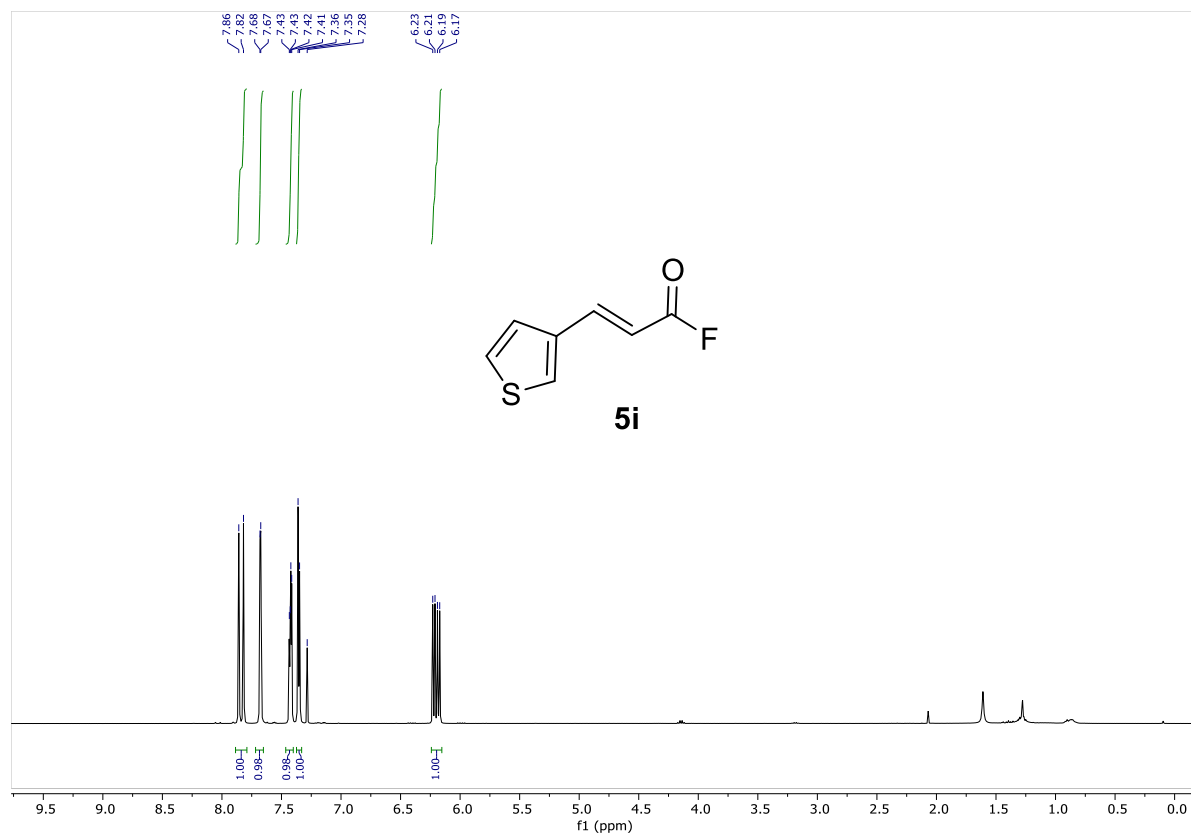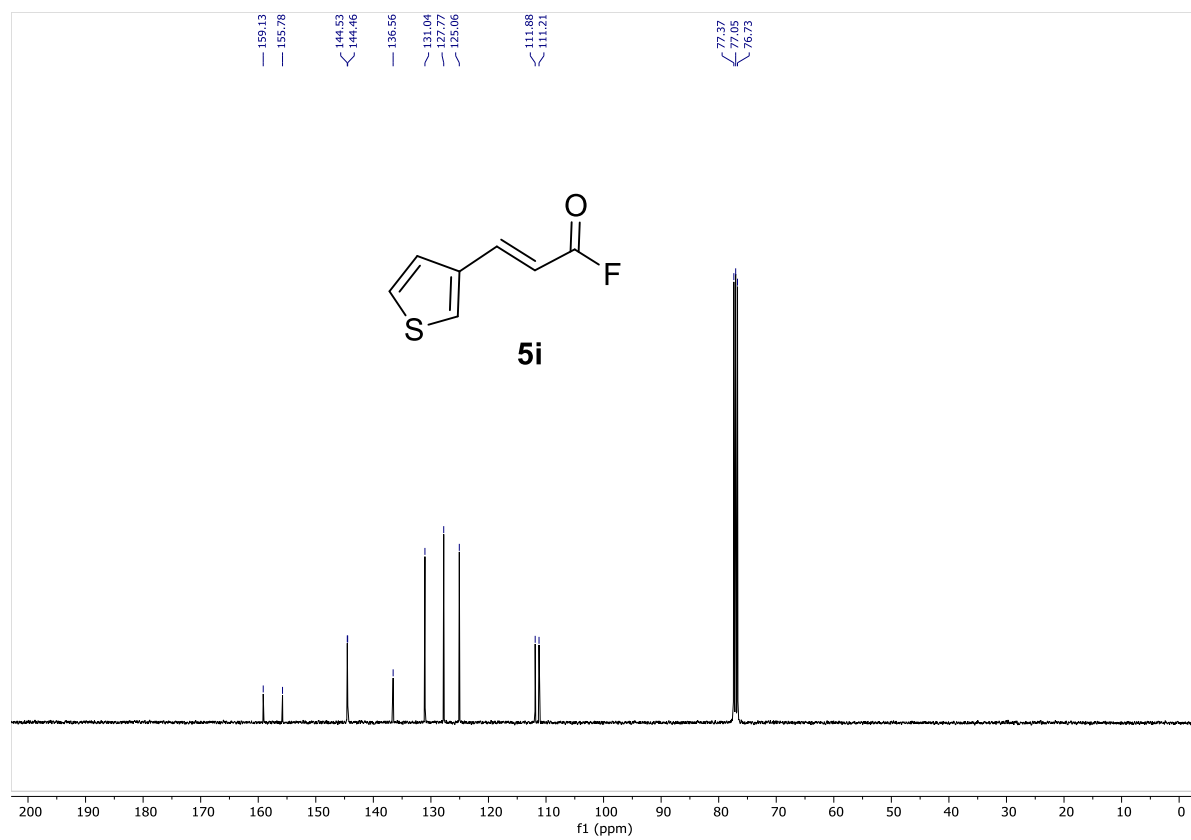

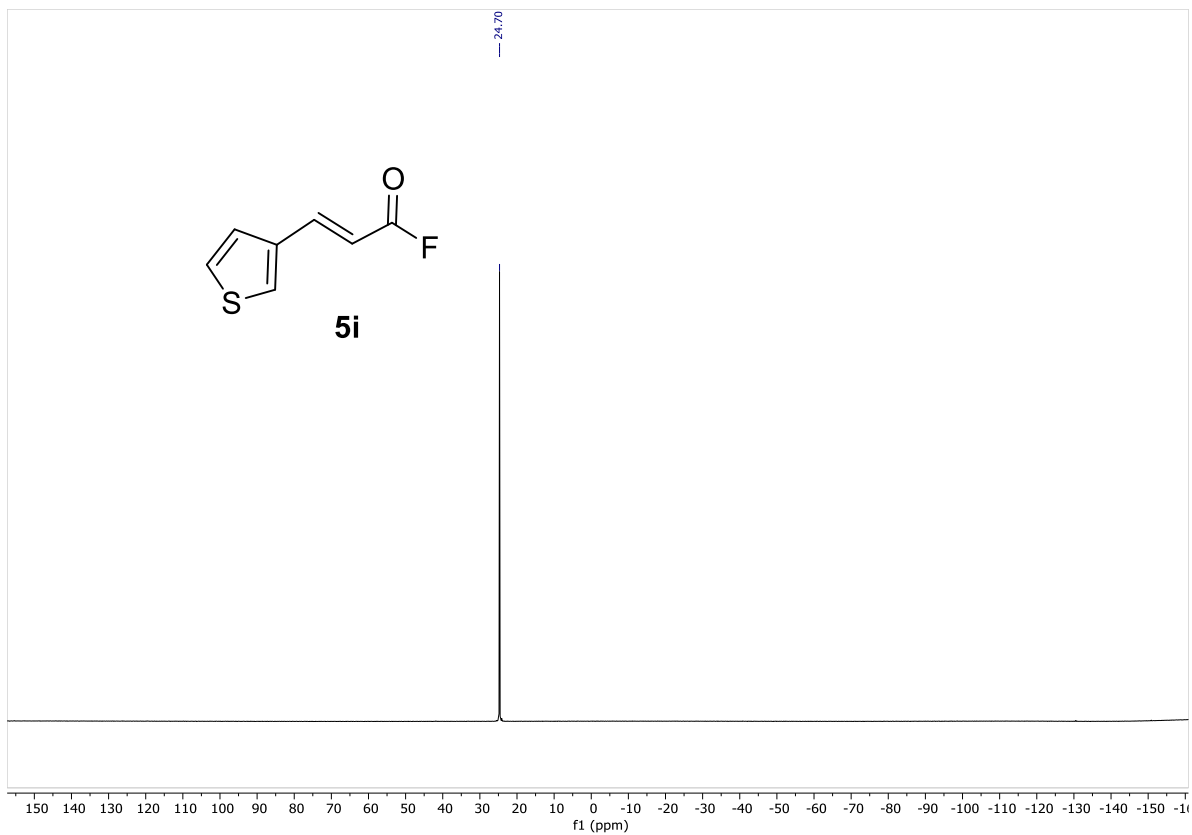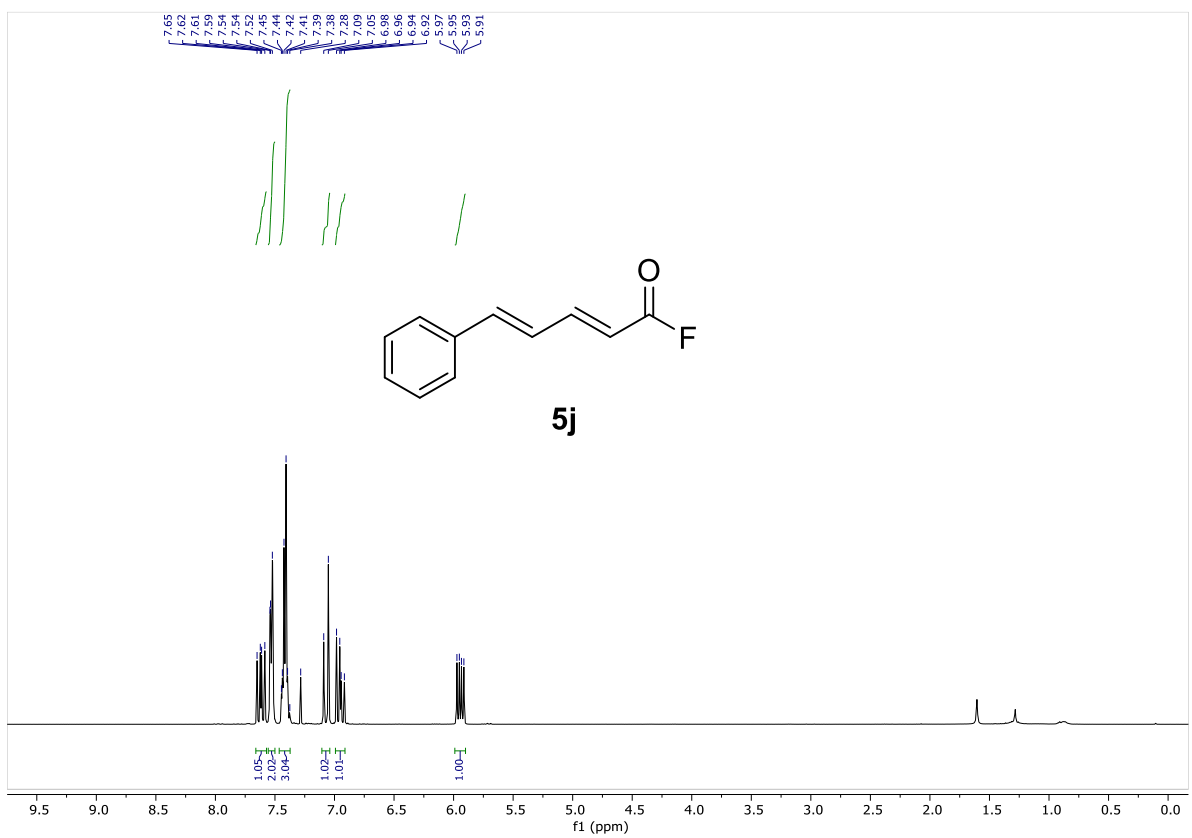

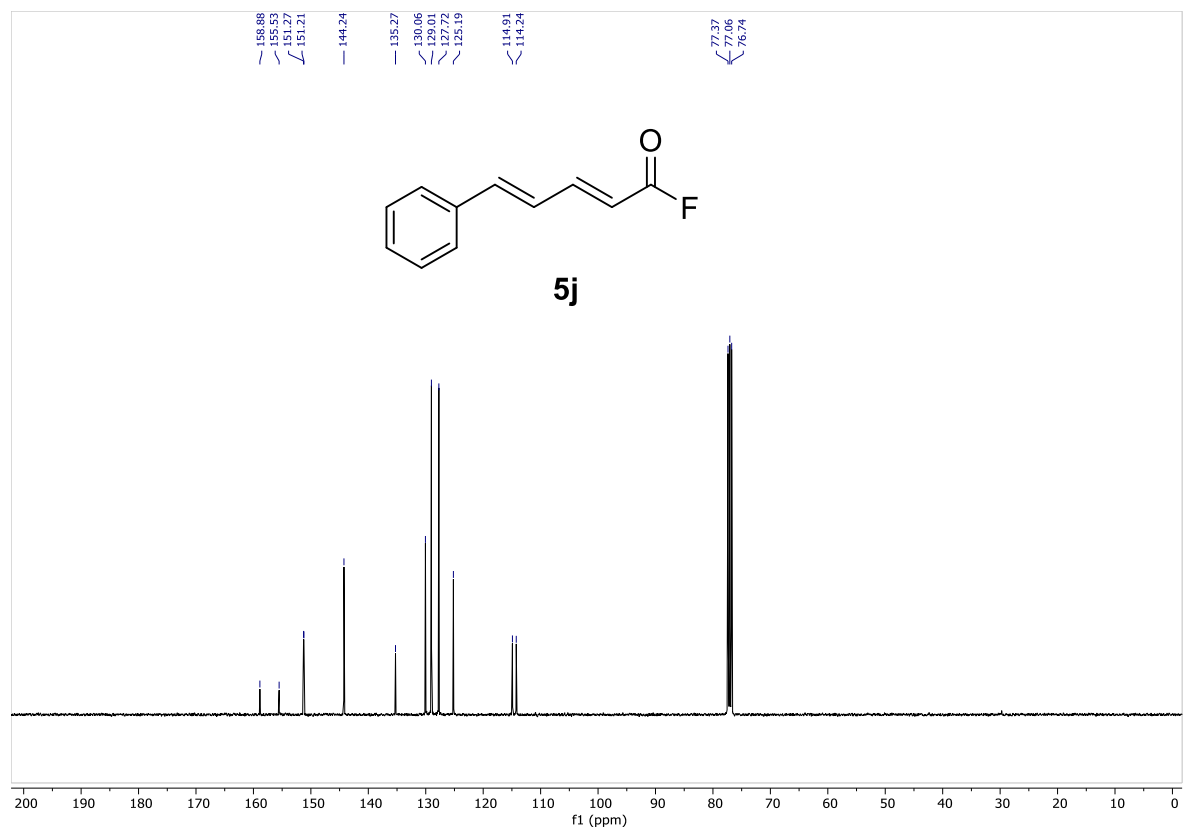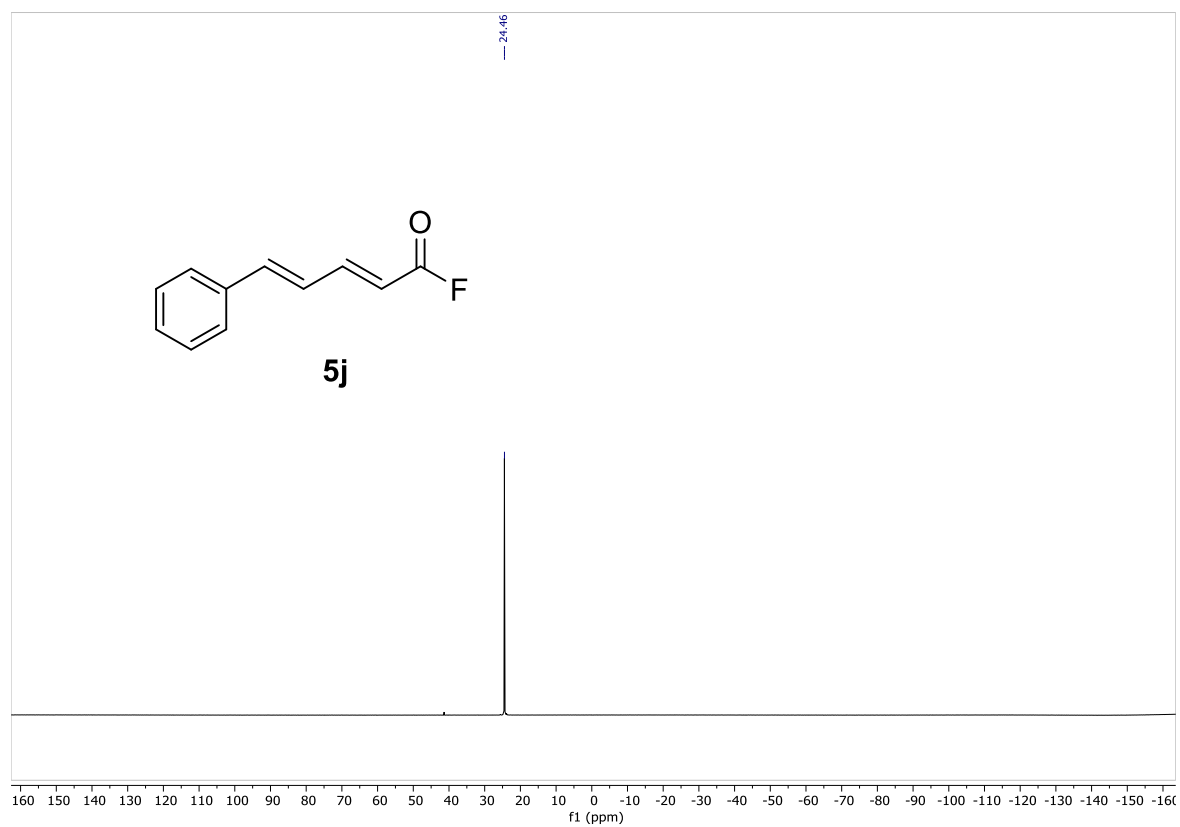



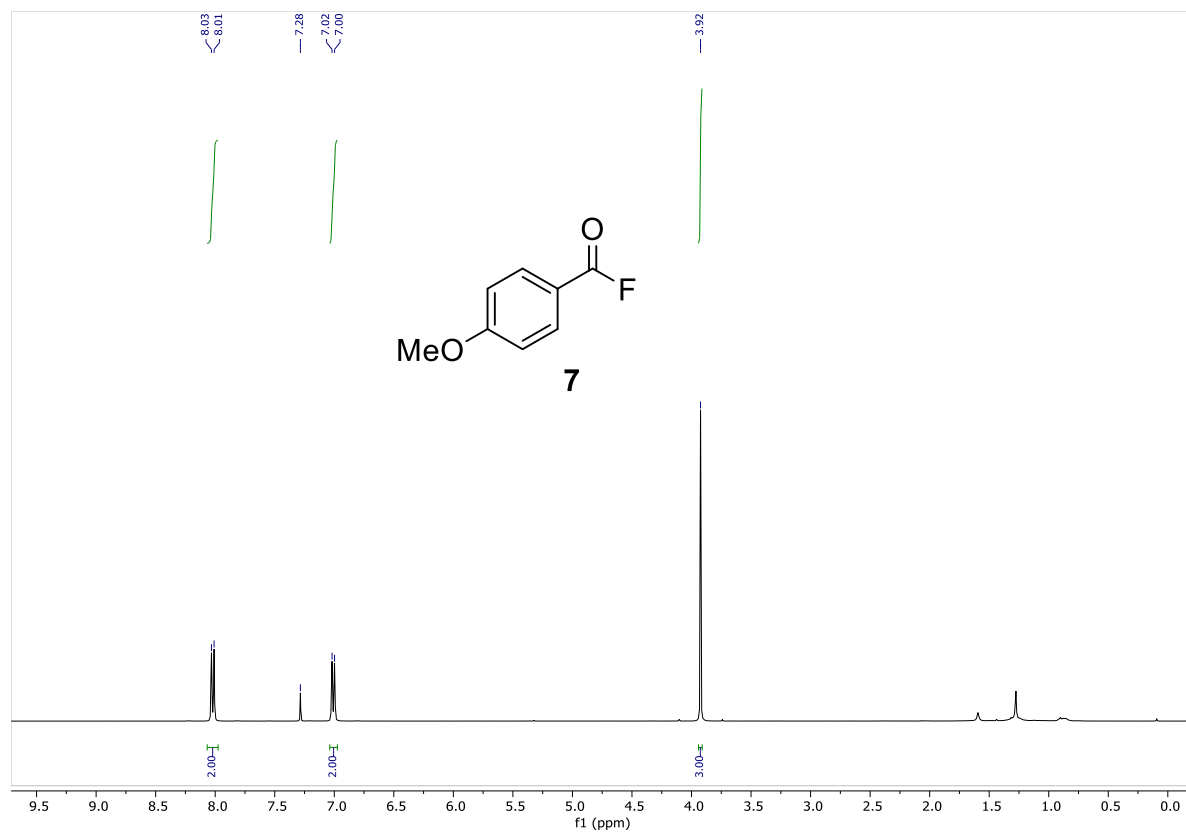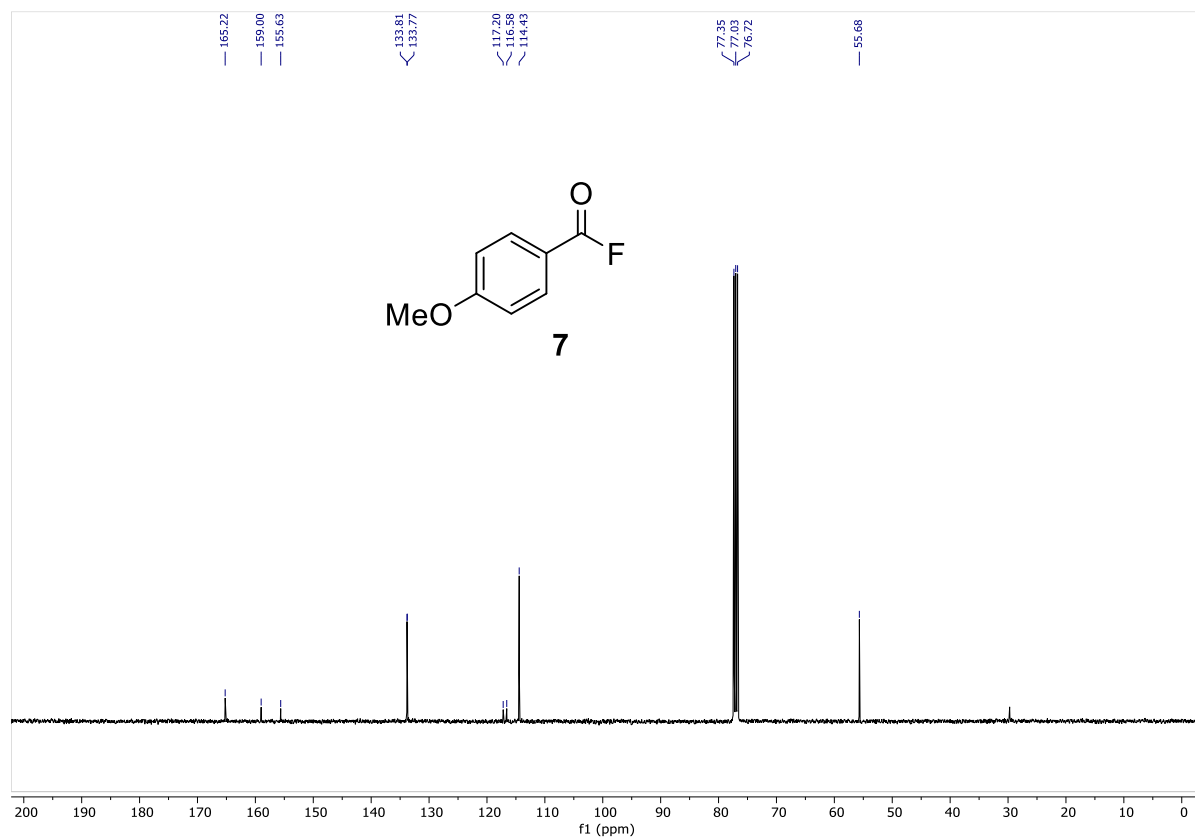

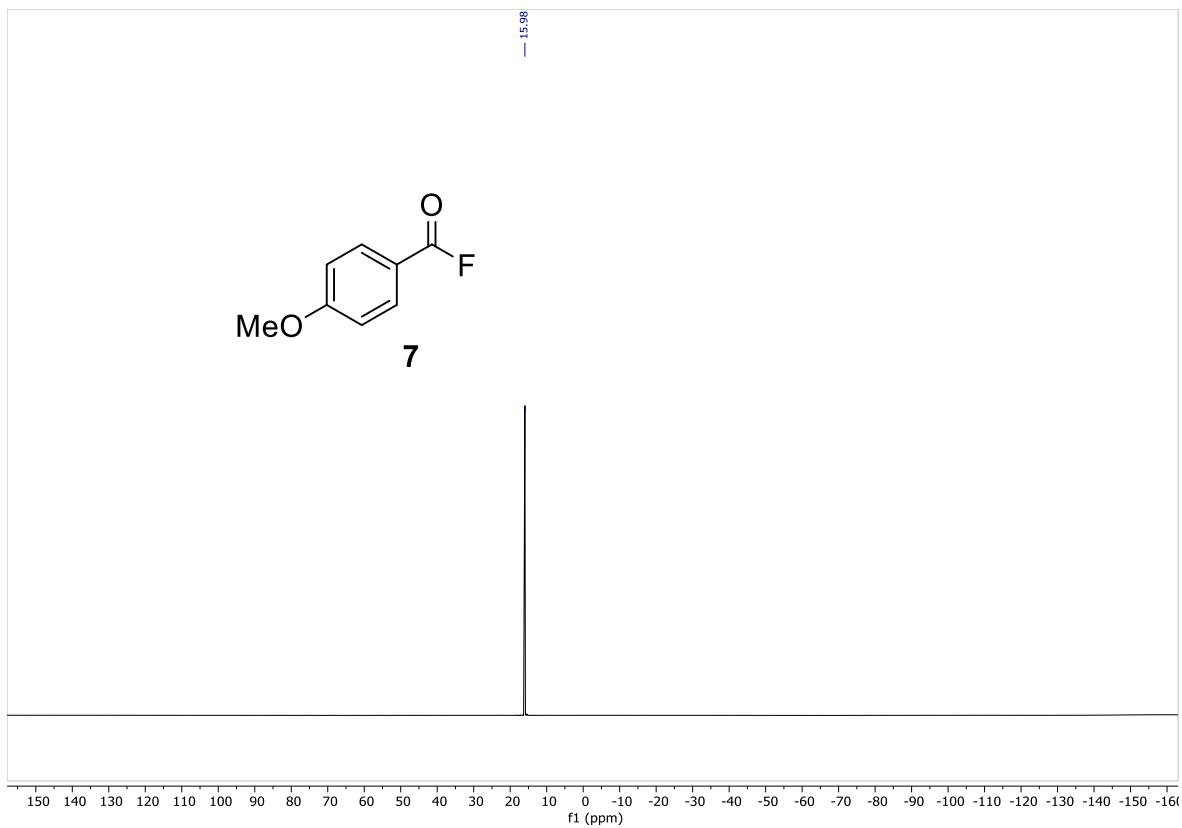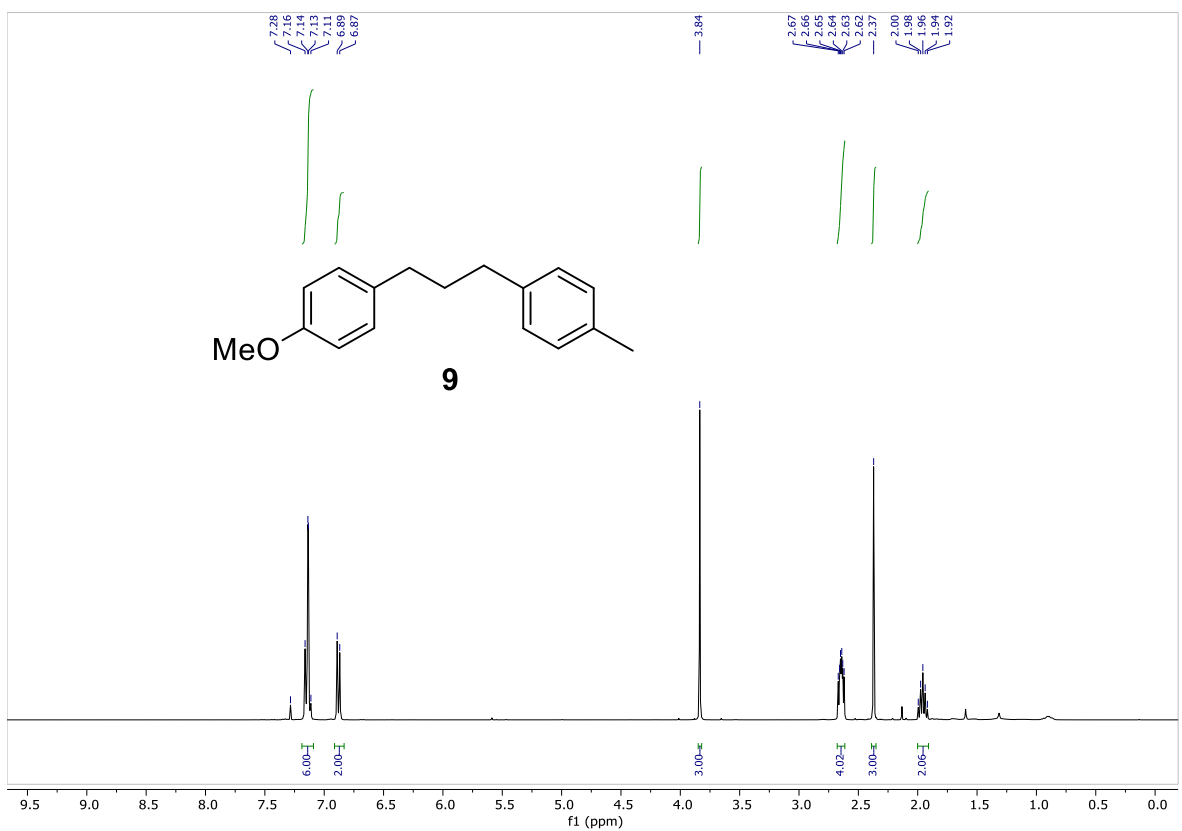

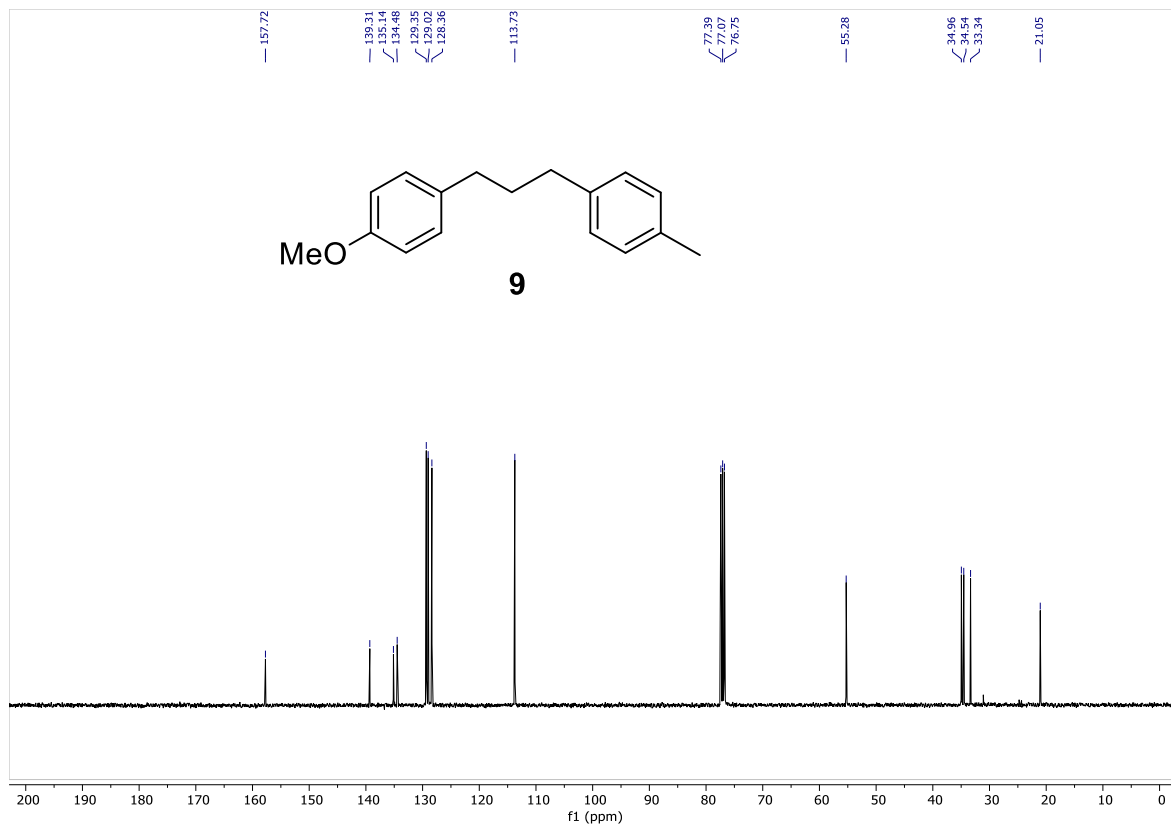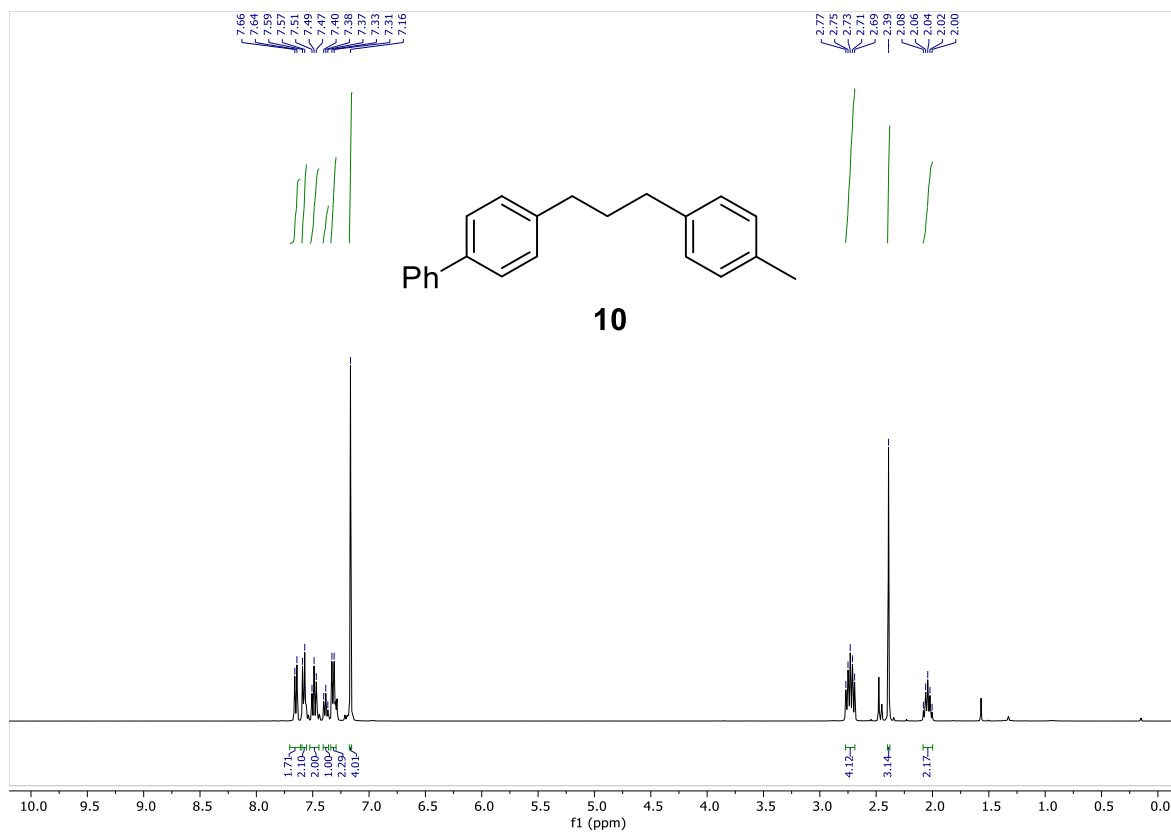

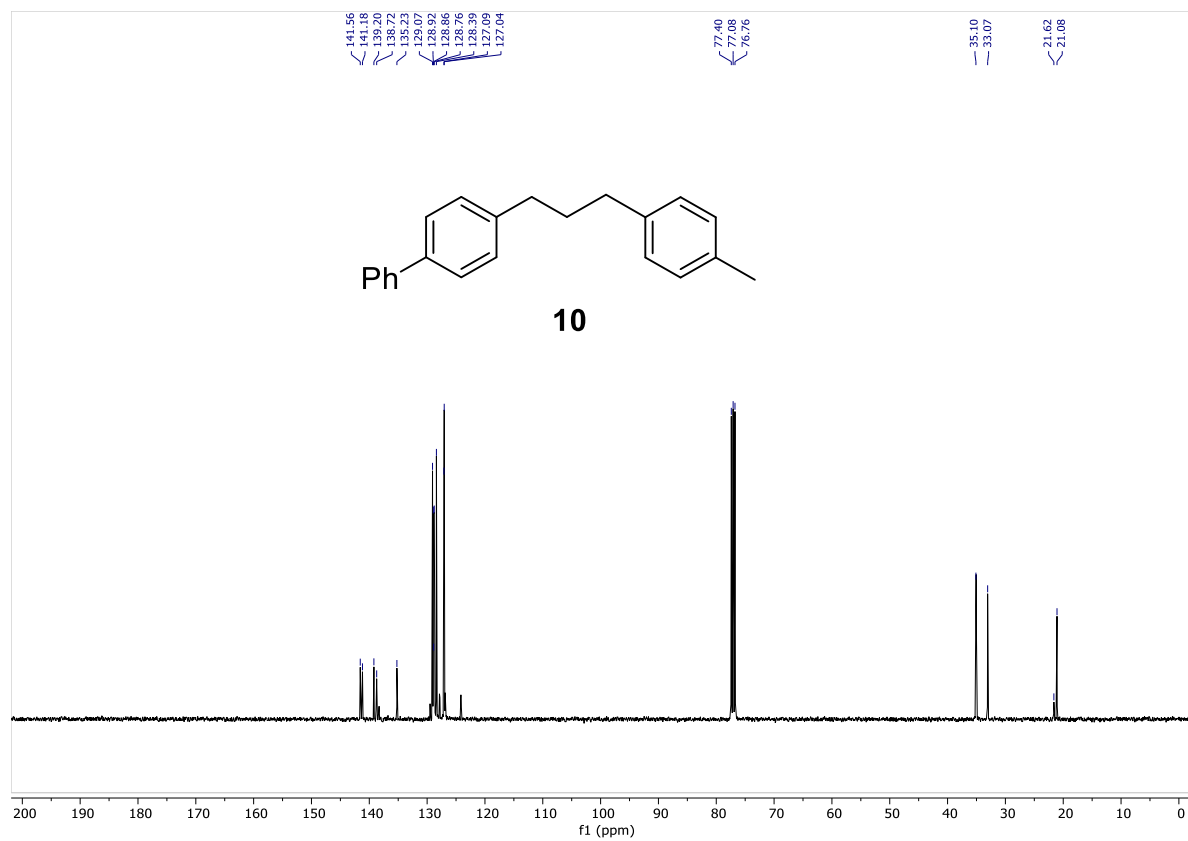

Supplement: d1qo01633d1.pdf [file d1qo01633d1.pdf]
